# Supplementary material for: Theoretical exploration to the significance of n(S)/n(O) → σ* (C-COOMe) stereoelectronic interactions
Source: Royal Society of Chemistry journal article supplement (doi:10.1039/d2nj03861g), 2022-11-21
Supplement: d2nj03861g1.pdf [file d2nj03861g1.pdf]

## Supplementary Information

### Theoretical exploration for the significance of $n(S) / n(O) \rightarrow \sigma^*(C-C_{(COOMe)})$ anomeric effect.

Sana Jindani<sup>†,§</sup> and Bishwajit Ganguly<sup>\*,†,§</sup>

<sup>†</sup> Computation and Simulation Unit (Analytical Discipline and Centralized Instrument Facility), CSIR-Central Salt and Marine Chemicals Research Institute, Bhavnagar 364002, Gujarat, India

<sup>§</sup> Academy of Scientific and Innovative Research (AcSIR), Ghaziabad, 201002, Uttar Pradesh, India

#### Table of Contents:

|                                                                                                                                                                                                                                                                                                                                                                                |     |
|--------------------------------------------------------------------------------------------------------------------------------------------------------------------------------------------------------------------------------------------------------------------------------------------------------------------------------------------------------------------------------|-----|
| 1. Table S1: Selected hyperconjugative interaction energies (E2), corresponding energy gaps ( $\Delta E_{d/a}$ ), % polarization of an orbital and overlap integral ( $S_{ij}$ ) for methyl 1,3-dioxane-2-carboxylate (2), methyl-1,3-oxathiane-2-carboxylate (3) and methyl 1,3-dithiane-2-carboxylate (4) in axial (n-ax) and equatorial (n-eq) conformation (n=2, 3 and 4). | S2  |
| 2. Molecular electrostatic Calculations (MESP)                                                                                                                                                                                                                                                                                                                                 | S2  |
| 3. Figure S1: Molecular electrostatic potential (MESP) surface computed at the B3LYP/6-311+G(d,p)/SMD(Chloroform) level of theory showing electrostatic repulsion between the two oxygen atoms in 2-ax.                                                                                                                                                                        | S3  |
| 4. Table S2: Comparison of structural parameters in the optimized geometries of 2-ax, 2-eq, 3-ax, 3-eq, 4-ax and 4-eq with those optimized geometries obtained by NBODEL, when switching off the key NBO Interactions.                                                                                                                                                         | S3  |
| 6. Table S3: NBO hyperconjugative interactions in 1-ax, 1-eq, 2-ax, 2-eq 3-ax, 3-eq, 4-ax and 4-eq.                                                                                                                                                                                                                                                                            | S4  |
| 7. Table S4: Dipole moment of the compounds 1-4 optimized at CBS-QB3 level.                                                                                                                                                                                                                                                                                                    | S24 |
| 8. Table S5: Cartesian coordinates of optimization at CBS-QB3 method with SMD(chloroform) solvation model.                                                                                                                                                                                                                                                                     | S25 |
| 9. Table S6: Cartesian coordinates of optimization at B3LYP/6-311+G(d,p)/SMD(chloroform).                                                                                                                                                                                                                                                                                      | S27 |
| 10. References                                                                                                                                                                                                                                                                                                                                                                 | S29 |

**Table S1:** Selected hyperconjugative interaction energies (E2), corresponding energy gaps ( $\Delta E_{d/a}$ ), % polarization of an orbital and overlap integral ( $S_{ij}$ ) for methyl 1,3-dioxane-2-carboxylate (2), methyl-1,3-oxathiane-2-carboxylate (3) and methyl 1,3-dithiane-2-carboxylate (4) in axial (n-ax) and equatorial (n-eq) conformation (n=2, 3 and 4).

|      | donor orbital                            | acceptor orbital                              | E(2)         | $\Delta E_{d/a}$ | % polarization |
|------|------------------------------------------|-----------------------------------------------|--------------|------------------|----------------|
|      | $n_{O(ax)}$                              | $\sigma_{C_2-C(ax)}^*$                        | 7.55-7.69    | 0.62             | 50.1%          |
|      | $n_{O(eq)}$                              | $\sigma_{C_2-C(ax)}^*$                        | 1.31-1.2     | 0.88             | 50.1%          |
| 2-ax | $n_{O(ax)}$                              | $\sigma_{C_2-O}^*$                            | 10.34-10.5   | 0.6              | 67.0%          |
|      | $n_{O(eq)}$                              | $\sigma_{C_2-O}^*$                            | 1.28-1.47    | 0.86             | 67.0%          |
|      | $\sigma_{O-C(4,6)}$                      | $\sigma_{C_2-C(ax)}^*$                        | -            | -                | -              |
|      | $n_{O(ax)}$                              | $\sigma_{C_2-O}^*$                            | 12.41-12.43  | 0.61             | 67.2%          |
| 2-eq | $n_{O(eq)}$                              | $\sigma_{C_2-O}^*$                            | 0.52-0.51    | 0.88             | 67.2%          |
|      | $\sigma_{O-C(4,6)}$                      | $\sigma_{C_2-C(eq)}^*$                        | 1.53-1.52    | 1.13             | 49.3%          |
|      | $n_{O(ax)}$<br>[ $n_{S(ax)}$ ]           | $\sigma_{C_2-C(ax)}^*$                        | 6.62 [3.88]  | 0.66 [0.58]      | 49.4%          |
|      | $n_{O(eq)}$ [ $n_{S(eq)}$ ]              | $\sigma_{C_2-C(ax)}^*$                        | 2.04 [-]     | 0.89 [-]         | 49.4%          |
|      | $n_{O(ax)}$<br>[ $n_{S(ax)}$ ]           | $\sigma_{C_2-S}^*$<br>[ $\sigma_{C(2)-O}^*$ ] | 11.99 [4.37] | 0.44 [0.55]      | 46.9% [66.6%]  |
| 3-ax | $n_{O(eq)}$ [ $n_{S(eq)}$ ]              | $\sigma_{C_2-S}^*$<br>[ $\sigma_{C(2)-O}^*$ ] | 2.17 [2.80]  | 0.67 [0.24]      | 46.9% [66.6%]  |
|      | $\sigma_{O-C_6}$<br>[ $\sigma_{S-C_4}$ ] | $\sigma_{C_2-C(ax)}^*$                        | -            | -                | -              |
|      | $n_{O(ax)}$<br>[ $n_{S(ax)}$ ]           | $\sigma_{C_2-S}^*$<br>[ $\sigma_{C(2)-O}^*$ ] | 14.09 [6.48] | 0.44 [0.55]      | 46.8% [66.8%]  |
| 3-eq | $n_{O(eq)}$ [ $n_{S(eq)}$ ]              | $\sigma_{C_2-S}^*$<br>[ $\sigma_{C(2)-O}^*$ ] | 0.86 [-]     | 0.68 [-]         | 46.8% [66.8%]  |
|      | $\sigma_{O-C_6}$<br>[ $\sigma_{S-C_4}$ ] | $\sigma_{C_2-C(eq)}^*$                        | 1.53 [1.13]  | 1.15 [0.93]      | 48.7%          |
|      | $n_{S(ax)}$                              | $\sigma_{C_2-C(ax)}^*$                        | 4.54-4.74    | 0.59             | 48.4%          |
| 4-ax | $n_{S(eq)}$                              | $\sigma_{C_2-C(ax)}^*$                        | 0.62         | 0.99             | 48.4%          |
|      | $n_{S(ax)}$                              | $\sigma_{C_2-S}^*$                            | 4.77-5.07    | 0.38             | 44.3%          |

|      |                     |                        |           |      |       |
|------|---------------------|------------------------|-----------|------|-------|
|      | $n_{S(eq)}$         | $\sigma_{C_2-S}^*$     | 2.13-2.1  | 0.78 | 44.3% |
|      | $\sigma_{S-C(4,6)}$ | $\sigma_{C_2-C(ax)}^*$ | -         | -    | -     |
|      | $n_{S(ax)}$         | $\sigma_{C_2-S}^*$     | 7.09-6.9  | 0.38 | 44.5% |
| 4-eq | $n_{S(eq)}$         | $\sigma_{C_2-S}^*$     | 1.13-1.1  | 0.78 | 44.5% |
|      | $\sigma_{S-C(4,6)}$ | $\sigma_{C_2-C(eq)}^*$ | 1.46-1.51 | 0.93 | 48.2% |

### Molecular electrostatic Calculations (MESP):

The molecular electrostatic potential (MESP)<sup>1-3</sup> calculations have been performed at the B3LYP/6-311+G(d,p)/SMD(Chloroform) and is calculated using charge on the nucleus A ( $Z_A$ ), its location ( $R_A$ ) and electron density  $\rho(r')$  using eq S1

$$V(r) = \sum_A^N \frac{Z_A}{|r - R_A|} - \int \frac{\rho(r') d^3r'}{|r - r'|} \quad (S1)$$

The blue regions of MESP surface generally reveal the electron-rich regions, whereas red/orange areas are considered electron-deficient regions. Figure S1 suggest electrostatic repulsion between the ring oxygen and the 2-carbomethoxy substituent.

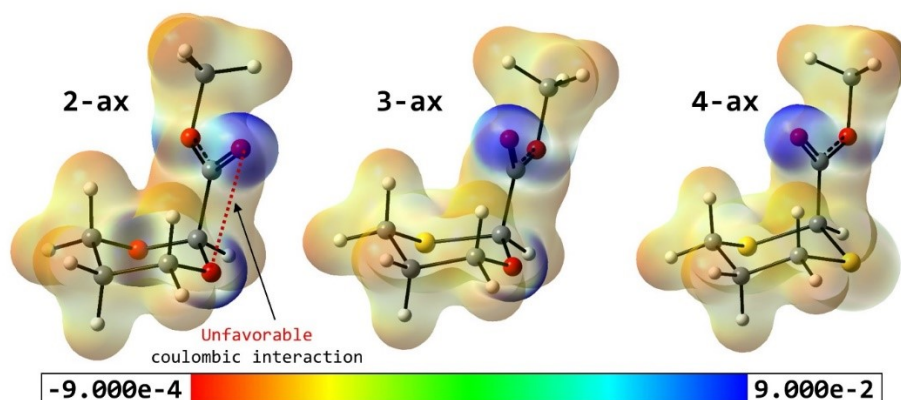

**Figure S1:** Molecular electrostatic potential (MESP) surface computed at the B3LYP/6-311+G(d,p)/SMD(Chloroform) level of theory showing electrostatic repulsion between the two oxygen atoms in 2-ax.

**Table S2:** Comparison of structural parameters in the optimized geometries of 2-ax, 2-eq, 3-ax, 3-eq, 4-ax and 4-eq with those optimized geometries obtained by NBODEL, when switching off the key NBO Interactions.

| methyl 1,3-dioxane-2-carboxylate, 2 |                |                        |                        |                        |                        |            |
|-------------------------------------|----------------|------------------------|------------------------|------------------------|------------------------|------------|
| bond                                | without NBODEL | O <sub>ax</sub> to C-C | O <sub>ax</sub> to C-O | O <sub>eq</sub> to C-C | O <sub>eq</sub> to C-O | O-C to C-C |
|                                     |                |                        |                        |                        |                        |            |

|                                | ax    | eq    | ax    | eq | ax    | eq    | ax    | eq | ax    | eq    | ax | eq    |
|--------------------------------|-------|-------|-------|----|-------|-------|-------|----|-------|-------|----|-------|
| Energy                         | 0.0   | 0.0   | 6.8   | -  | 9.1   | 11.4  | 1.9   | -  | 2.4   | 0.9   | -  | 2.3   |
| C <sub>2</sub> -C              | 1.54  | 1.52  | 1.53  | -  | 1.54  | 1.52  | 1.54  | -  | 1.53  | 1.52  | -  | 1.52  |
| C <sub>2</sub> -O <sub>d</sub> | 1.38  | 1.38  | 1.41  | -  | 1.42  | 1.44  | 1.39  | -  | 1.38  | 1.39  | -  | 1.4   |
| C <sub>2</sub> -O <sub>a</sub> | 1.38  | 1.38  | 1.38  | -  | 1.36  | 1.36  | 1.37  | -  | 1.38  | 1.38  | -  | 1.38  |
| O-C <sub>2</sub> -O            | 113.3 | 112.4 | 113.2 | -  | 111.9 | 110.9 | 113.1 | -  | 112.8 | 112.1 | -  | 112.2 |

| methyl-1,3-oxathiane-2-carboxylate, 3 |                        |       |                        |       |                        |       |                        |       |                        |       |                        |    |
|---------------------------------------|------------------------|-------|------------------------|-------|------------------------|-------|------------------------|-------|------------------------|-------|------------------------|----|
| bond                                  | without NBODEL         |       | O <sub>ax</sub> to C-C |       | O <sub>ax</sub> to C-S |       | O <sub>eq</sub> to C-C |       | O <sub>eq</sub> to C-S |       | S <sub>ax</sub> to C-C |    |
|                                       | ax                     | eq    | ax                     | eq |
| Energy                                | 0.00                   | 0.00  | 6.19                   | -     | 7.97                   | 10.09 | 2.39                   | -     | 2.93                   | 0.98  | 4.33                   | -  |
| C <sub>2</sub> -C                     | 1.52                   | 1.52  | 1.51                   | -     | 1.53                   | 1.52  | 1.53                   | -     | 1.52                   | 1.52  | 1.52                   | -  |
| C <sub>2</sub> -O                     | 1.38                   | 1.38  | 1.41                   | -     | 1.42                   | 1.43  | 1.39                   | -     | 1.38                   | 1.38  | 1.38                   | -  |
| C <sub>2</sub> -S                     | 1.83                   | 1.83  | 1.84                   | -     | 1.8                    | 1.8   | 1.83                   | -     | 1.84                   | 1.84  | 1.86                   | -  |
| S-C <sub>2</sub> -S                   | 114.1                  | 112.5 | 114.1                  | -     | 112.5                  | 110.8 | 113.9                  | -     | 113.9                  | 112.3 | 114.5                  | -  |
|                                       | S <sub>ax</sub> to C-O |       | S <sub>eq</sub> to C-O |       | S-C to C-C             |       | O-C to C-C             |       |                        |       |                        |    |
|                                       | ax                     | eq    | ax                     | eq    | ax                     | eq    | ax                     | eq    |                        |       |                        |    |
|                                       | 4.41                   | 6.58  | 1.74                   | 0.79  | -                      | 0.00  | -                      | 2.08  |                        |       |                        |    |
| C <sub>2</sub> -C                     | 1.52                   | 1.52  | 1.52                   | 1.52  | -                      | 1.52  | -                      | 1.52  |                        |       |                        |    |
| C <sub>2</sub> -O                     | 1.37                   | 1.37  | 1.38                   | 1.38  | -                      | 1.38  | -                      | 1.39  |                        |       |                        |    |
| C <sub>2</sub> -S                     | 1.86                   | 1.88  | 1.85                   | 1.84  | -                      | 1.83  | -                      | 1.83  |                        |       |                        |    |
| S-C <sub>2</sub> -S                   | 113.5                  | 111.4 | 113.4                  | 112.1 | -                      | 112.5 | -                      | 112.3 |                        |       |                        |    |

| methyl 1,3-dithiane-2-carboxylate, 4 |                |       |                        |    |                        |       |                        |    |                        |       |            |       |
|--------------------------------------|----------------|-------|------------------------|----|------------------------|-------|------------------------|----|------------------------|-------|------------|-------|
| bond                                 | without NBODEL |       | S <sub>ax</sub> to C-C |    | S <sub>ax</sub> to C-S |       | S <sub>eq</sub> to C-C |    | S <sub>eq</sub> to C-S |       | S-C to C-C |       |
|                                      | ax             | eq    | ax                     | eq | ax                     | eq    | ax                     | eq | ax                     | eq    | ax         | eq    |
| Energy                               | 0.0            | 0.0   | 4.8                    | -  | 4.1                    | 5.8   | 1.2                    | -  | 2.8                    | 1.6   | -          | 2.1   |
| C <sub>2</sub> -C                    | 1.52           | 1.52  | 1.51                   | -  | 1.52                   | 1.52  | 1.52                   | -  | 1.52                   | 1.52  | -          | 1.52  |
| C <sub>2</sub> -S <sub>d</sub>       | 1.81           | 1.82  | 1.85                   | -  | 1.85                   | 1.86  | 1.82                   | -  | 1.83                   | 1.86  | -          | 1.83  |
| C <sub>2</sub> -S <sub>a</sub>       | 1.82           | 1.83  | 1.82                   | -  | 1.81                   | 1.81  | 1.82                   | -  | 1.82                   | 1.81  | -          | 1.83  |
| S-C <sub>2</sub> -S                  | 114.8          | 113.9 | 114.8                  | -  | 113.5                  | 112.2 | 114.8                  | -  | 114.2                  | 112.2 | -          | 113.8 |

Table S3: NBO hyperconjugative interactions:

1-ax

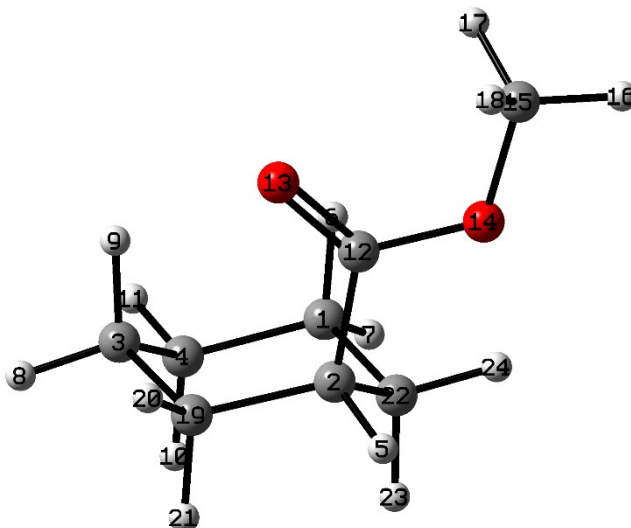

Second Order Perturbation Theory Analysis of Fock Matrix in NBO Basis

Threshold for printing: 0.50 kcal/mol

| Donor NBO (i)         | Acceptor NBO (j)          | E(2)<br>kcal/mol | E(j)-E(i)<br>a.u. | F(i,j)<br>a.u. |
|-----------------------|---------------------------|------------------|-------------------|----------------|
| =====                 |                           |                  |                   |                |
| within unit 1         |                           |                  |                   |                |
| 1. BD ( 1) C 1 - C 4  | / 74. RY*( 1) C 3         | 1.05             | 1.43              | 0.035          |
| 1. BD ( 1) C 1 - C 4  | /253. RY*( 1) C 22        | 1.00             | 1.45              | 0.034          |
| 1. BD ( 1) C 1 - C 4  | /283. BD*( 1) C 1 - C 22  | 0.71             | 0.98              | 0.024          |
| 1. BD ( 1) C 1 - C 4  | /288. BD*( 1) C 3 - C 4   | 0.70             | 0.99              | 0.024          |
| 1. BD ( 1) C 1 - C 4  | /289. BD*( 1) C 3 - H 8   | 1.68             | 1.00              | 0.037          |
| 1. BD ( 1) C 1 - C 4  | /304. BD*( 1) C 22 - H 24 | 1.75             | 1.01              | 0.038          |
| 2. BD ( 1) C 1 - H 6  | /292. BD*( 1) C 4 - H 10  | 2.78             | 0.88              | 0.044          |
| 2. BD ( 1) C 1 - H 6  | /303. BD*( 1) C 22 - H 23 | 2.83             | 0.89              | 0.045          |
| 3. BD ( 1) C 1 - H 7  | /287. BD*( 1) C 2 - C 22  | 3.22             | 0.86              | 0.047          |
| 3. BD ( 1) C 1 - H 7  | /288. BD*( 1) C 3 - C 4   | 2.87             | 0.88              | 0.045          |
| 4. BD ( 1) C 1 - C 22 | / 57. RY*( 1) C 2         | 1.39             | 1.52              | 0.041          |
| 4. BD ( 1) C 1 - C 22 | / 91. RY*( 1) C 4         | 1.04             | 1.46              | 0.035          |
| 4. BD ( 1) C 1 - C 22 | /280. BD*( 1) C 1 - C 4   | 0.71             | 0.99              | 0.024          |
| 4. BD ( 1) C 1 - C 22 | /284. BD*( 1) C 2 - H 5   | 1.56             | 0.99              | 0.035          |
| 4. BD ( 1) C 1 - C 22 | /287. BD*( 1) C 2 - C 22  | 0.69             | 0.97              | 0.023          |
| 4. BD ( 1) C 1 - C 22 | /293. BD*( 1) C 4 - H 11  | 1.67             | 1.01              | 0.037          |
| 5. BD ( 1) C 2 - H 5  | /283. BD*( 1) C 1 - C 22  | 3.00             | 0.88              | 0.046          |
| 5. BD ( 1) C 2 - H 5  | /291. BD*( 1) C 3 - C 19  | 3.01             | 0.88              | 0.046          |
| 5. BD ( 1) C 2 - H 5  | /294. BD*( 1) C 12 - O 13 | 2.12             | 1.09              | 0.043          |
| 5. BD ( 1) C 2 - H 5  | /295. BD*( 2) C 12 - O 13 | 6.63             | 0.49              | 0.053          |
| 6. BD ( 1) C 2 - C 12 | /160. RY*( 1) O 13        | 1.10             | 1.43              | 0.036          |
| 6. BD ( 1) C 2 - C 12 | /177. RY*( 1) O 14        | 0.52             | 1.24              | 0.023          |
| 6. BD ( 1) C 2 - C 12 | /226. RY*( 1) C 19        | 0.77             | 1.47              | 0.030          |
| 6. BD ( 1) C 2 - C 12 | /253. RY*( 1) C 22        | 0.54             | 1.50              | 0.026          |
| 6. BD ( 1) C 2 - C 12 | /287. BD*( 1) C 2 - C 22  | 0.64             | 1.01              | 0.023          |
| 6. BD ( 1) C 2 - C 12 | /294. BD*( 1) C 12 - O 13 | 1.36             | 1.24              | 0.037          |
| 6. BD ( 1) C 2 - C 12 | /297. BD*( 1) O 14 - C 15 | 4.13             | 0.89              | 0.054          |
| 6. BD ( 1) C 2 - C 12 | /302. BD*( 1) C 19 - H 21 | 1.40             | 1.05              | 0.034          |
| 6. BD ( 1) C 2 - C 12 | /303. BD*( 1) C 22 - H 23 | 1.34             | 1.04              | 0.034          |
| 7. BD ( 1) C 2 - C 19 | / 74. RY*( 1) C 3         | 0.77             | 1.44              | 0.030          |
| 7. BD ( 1) C 2 - C 19 | /143. RY*( 1) C 12        | 0.98             | 1.57              | 0.035          |
| 7. BD ( 1) C 2 - C 19 | /253. RY*( 1) C 22        | 0.75             | 1.46              | 0.030          |
| 7. BD ( 1) C 2 - C 19 | /284. BD*( 1) C 2 - H 5   | 0.68             | 1.00              | 0.023          |
| 7. BD ( 1) C 2 - C 19 | /285. BD*( 1) C 2 - C 12  | 0.53             | 0.97              | 0.020          |
| 7. BD ( 1) C 2 - C 19 | /287. BD*( 1) C 2 - C 22  | 1.08             | 0.97              | 0.029          |
| 7. BD ( 1) C 2 - C 19 | /289. BD*( 1) C 3 - H 8   | 1.44             | 1.01              | 0.034          |
| 7. BD ( 1) C 2 - C 19 | /291. BD*( 1) C 3 - C 19  | 0.67             | 0.99              | 0.023          |
| 7. BD ( 1) C 2 - C 19 | /296. BD*( 1) C 12 - O 14 | 2.77             | 0.96              | 0.047          |
| 7. BD ( 1) C 2 - C 19 | /304. BD*( 1) C 22 - H 24 | 1.65             | 1.02              | 0.037          |
| 8. BD ( 1) C 2 - C 22 | / 40. RY*( 1) C 1         | 0.84             | 1.46              | 0.031          |
| 8. BD ( 1) C 2 - C 22 | /226. RY*( 1) C 19        | 0.69             | 1.42              | 0.028          |
| 8. BD ( 1) C 2 - C 22 | /282. BD*( 1) C 1 - H 7   | 1.52             | 1.00              | 0.035          |
| 8. BD ( 1) C 2 - C 22 | /283. BD*( 1) C 1 - C 22  | 0.58             | 0.99              | 0.021          |
| 8. BD ( 1) C 2 - C 22 | /284. BD*( 1) C 2 - H 5   | 0.65             | 0.99              | 0.023          |

|                         |                           |       |       |       |
|-------------------------|---------------------------|-------|-------|-------|
| 8. BD ( 1) C 2 - C 22   | /286. BD*( 1) C 2 - C 19  | 0.99  | 0.98  | 0.028 |
| 8. BD ( 1) C 2 - C 22   | /294. BD*( 1) C 12 - 0 13 | 2.39  | 1.19  | 0.048 |
| 8. BD ( 1) C 2 - C 22   | /295. BD*( 2) C 12 - 0 13 | 1.94  | 0.60  | 0.032 |
| 8. BD ( 1) C 2 - C 22   | /301. BD*( 1) C 19 - H 20 | 1.69  | 1.01  | 0.037 |
| 9. BD ( 1) C 3 - C 4    | / 40. RY*( 1) C 1         | 1.05  | 1.46  | 0.035 |
| 9. BD ( 1) C 3 - C 4    | /226. RY*( 1) C 19        | 0.90  | 1.42  | 0.032 |
| 9. BD ( 1) C 3 - C 4    | /280. BD*( 1) C 1 - C 4   | 0.70  | 0.98  | 0.023 |
| 9. BD ( 1) C 3 - C 4    | /282. BD*( 1) C 1 - H 7   | 1.72  | 1.00  | 0.037 |
| 9. BD ( 1) C 3 - C 4    | /291. BD*( 1) C 3 - C 19  | 0.67  | 0.98  | 0.023 |
| 9. BD ( 1) C 3 - C 4    | /301. BD*( 1) C 19 - H 20 | 1.67  | 1.01  | 0.037 |
| 10. BD ( 1) C 3 - H 8   | /280. BD*( 1) C 1 - C 4   | 2.94  | 0.88  | 0.045 |
| 10. BD ( 1) C 3 - H 8   | /286. BD*( 1) C 2 - C 19  | 3.22  | 0.86  | 0.047 |
| 11. BD ( 1) C 3 - H 9   | /226. RY*( 1) C 19        | 0.62  | 1.30  | 0.025 |
| 11. BD ( 1) C 3 - H 9   | /292. BD*( 1) C 4 - H 10  | 2.86  | 0.88  | 0.045 |
| 11. BD ( 1) C 3 - H 9   | /302. BD*( 1) C 19 - H 21 | 2.76  | 0.88  | 0.044 |
| 12. BD ( 1) C 3 - C 19  | / 58. RY*( 2) C 2         | 1.15  | 1.48  | 0.037 |
| 12. BD ( 1) C 3 - C 19  | / 91. RY*( 1) C 4         | 0.99  | 1.45  | 0.034 |
| 12. BD ( 1) C 3 - C 19  | /284. BD*( 1) C 2 - H 5   | 1.67  | 0.99  | 0.036 |
| 12. BD ( 1) C 3 - C 19  | /286. BD*( 1) C 2 - C 19  | 0.72  | 0.97  | 0.024 |
| 12. BD ( 1) C 3 - C 19  | /288. BD*( 1) C 3 - C 4   | 0.66  | 0.99  | 0.023 |
| 12. BD ( 1) C 3 - C 19  | /293. BD*( 1) C 4 - H 11  | 1.65  | 1.00  | 0.036 |
| 12. BD ( 1) C 3 - C 19  | /301. BD*( 1) C 19 - H 20 | 0.50  | 1.01  | 0.020 |
| 13. BD ( 1) C 4 - H 10  | /281. BD*( 1) C 1 - H 6   | 2.88  | 0.88  | 0.045 |
| 13. BD ( 1) C 4 - H 10  | /290. BD*( 1) C 3 - H 9   | 2.75  | 0.89  | 0.044 |
| 14. BD ( 1) C 4 - H 11  | /283. BD*( 1) C 1 - C 22  | 2.98  | 0.87  | 0.046 |
| 14. BD ( 1) C 4 - H 11  | /291. BD*( 1) C 3 - C 19  | 3.03  | 0.88  | 0.046 |
| 15. BD ( 1) C 12 - 0 13 | /143. RY*( 1) C 12        | 1.79  | 2.07  | 0.055 |
| 15. BD ( 1) C 12 - 0 13 | /285. BD*( 1) C 2 - C 12  | 1.49  | 1.47  | 0.042 |
| 16. BD ( 2) C 12 - 0 13 | /284. BD*( 1) C 2 - H 5   | 1.37  | 0.80  | 0.029 |
| 16. BD ( 2) C 12 - 0 13 | /287. BD*( 1) C 2 - C 22  | 1.01  | 0.77  | 0.025 |
| 16. BD ( 2) C 12 - 0 13 | /295. BD*( 2) C 12 - 0 13 | 0.68  | 0.40  | 0.016 |
| 17. BD ( 1) C 12 - 0 14 | / 57. RY*( 1) C 2         | 0.51  | 1.86  | 0.027 |
| 17. BD ( 1) C 12 - 0 14 | /196. RY*( 3) C 15        | 1.50  | 1.75  | 0.046 |
| 17. BD ( 1) C 12 - 0 14 | /286. BD*( 1) C 2 - C 19  | 1.05  | 1.32  | 0.033 |
| 18. BD ( 1) 0 14 - C 15 | /143. RY*( 1) C 12        | 1.42  | 1.79  | 0.045 |
| 18. BD ( 1) 0 14 - C 15 | /285. BD*( 1) C 2 - C 12  | 2.45  | 1.20  | 0.049 |
| 19. BD ( 1) C 15 - H 16 | /180. RY*( 4) 0 14        | 0.53  | 1.86  | 0.028 |
| 19. BD ( 1) C 15 - H 16 | /296. BD*( 1) C 12 - 0 14 | 2.96  | 0.89  | 0.047 |
| 20. BD ( 1) C 15 - H 17 | /297. BD*( 1) 0 14 - C 15 | 0.63  | 0.78  | 0.020 |
| 21. BD ( 1) C 15 - H 18 | /178. RY*( 2) 0 14        | 0.67  | 1.31  | 0.026 |
| 21. BD ( 1) C 15 - H 18 | /297. BD*( 1) 0 14 - C 15 | 0.64  | 0.78  | 0.020 |
| 22. BD ( 1) C 19 - H 20 | /287. BD*( 1) C 2 - C 22  | 3.11  | 0.86  | 0.046 |
| 22. BD ( 1) C 19 - H 20 | /288. BD*( 1) C 3 - C 4   | 2.87  | 0.88  | 0.045 |
| 23. BD ( 1) C 19 - H 21 | /285. BD*( 1) C 2 - C 12  | 3.30  | 0.86  | 0.048 |
| 23. BD ( 1) C 19 - H 21 | /290. BD*( 1) C 3 - H 9   | 2.78  | 0.89  | 0.045 |
| 24. BD ( 1) C 22 - H 23 | /281. BD*( 1) C 1 - H 6   | 2.90  | 0.89  | 0.045 |
| 24. BD ( 1) C 22 - H 23 | /285. BD*( 1) C 2 - C 12  | 3.42  | 0.86  | 0.049 |
| 25. BD ( 1) C 22 - H 24 | /280. BD*( 1) C 1 - C 4   | 2.78  | 0.88  | 0.044 |
| 25. BD ( 1) C 22 - H 24 | /286. BD*( 1) C 2 - C 19  | 2.97  | 0.87  | 0.045 |
| 26. CR ( 1) C 1         | /256. RY*( 4) C 22        | 0.82  | 11.23 | 0.086 |
| 27. CR ( 1) C 2         | /255. RY*( 3) C 22        | 0.52  | 11.09 | 0.068 |
| 27. CR ( 1) C 2         | /294. BD*( 1) C 12 - 0 13 | 0.73  | 10.65 | 0.079 |
| 28. CR ( 1) C 3         | / 94. RY*( 4) C 4         | 0.54  | 11.06 | 0.069 |
| 28. CR ( 1) C 3         | /229. RY*( 4) C 19        | 0.75  | 11.33 | 0.082 |
| 29. CR ( 1) C 4         | / 42. RY*( 3) C 1         | 0.51  | 11.07 | 0.067 |
| 29. CR ( 1) C 4         | / 76. RY*( 3) C 3         | 0.54  | 11.05 | 0.069 |
| 30. CR ( 1) C 12        | / 59. RY*( 3) C 2         | 0.91  | 11.27 | 0.090 |
| 30. CR ( 1) C 12        | /297. BD*( 1) 0 14 - C 15 | 1.20  | 10.44 | 0.100 |
| 31. CR ( 1) 0 13        | /143. RY*( 1) C 12        | 7.10  | 19.82 | 0.337 |
| 31. CR ( 1) 0 13        | /285. BD*( 1) C 2 - C 12  | 0.69  | 19.23 | 0.105 |
| 32. CR ( 1) 0 14        | /143. RY*( 1) C 12        | 1.27  | 19.95 | 0.143 |
| 32. CR ( 1) 0 14        | /144. RY*( 2) C 12        | 0.86  | 20.75 | 0.120 |
| 32. CR ( 1) 0 14        | /146. RY*( 4) C 12        | 1.00  | 20.73 | 0.129 |
| 32. CR ( 1) 0 14        | /194. RY*( 1) C 15        | 0.58  | 19.98 | 0.096 |
| 32. CR ( 1) 0 14        | /196. RY*( 3) C 15        | 0.61  | 19.79 | 0.098 |
| 33. CR ( 1) C 15        | /212. RY*( 2) H 16        | 0.54  | 12.18 | 0.072 |
| 33. CR ( 1) C 15        | /296. BD*( 1) C 12 - 0 14 | 0.85  | 10.46 | 0.086 |
| 33. CR ( 1) C 15        | /297. BD*( 1) 0 14 - C 15 | 1.77  | 10.35 | 0.121 |
| 34. CR ( 1) C 19        | / 58. RY*( 2) C 2         | 0.68  | 10.91 | 0.077 |
| 34. CR ( 1) C 19        | / 76. RY*( 3) C 3         | 0.70  | 11.05 | 0.079 |
| 35. CR ( 1) C 22        | / 42. RY*( 3) C 1         | 0.79  | 11.07 | 0.084 |
| 35. CR ( 1) C 22        | / 58. RY*( 2) C 2         | 0.59  | 10.92 | 0.072 |
| 35. CR ( 1) C 22        | /275. RY*( 1) H 24        | 0.54  | 11.29 | 0.070 |
| 36. LP ( 1) 0 13        | /143. RY*( 1) C 12        | 17.42 | 1.68  | 0.153 |

|      |                     |       |                     |       |      |       |
|------|---------------------|-------|---------------------|-------|------|-------|
| 36.  | LP ( 1) 0 13        | /157. | RY*( 15) C 12       | 1.10  | 3.52 | 0.056 |
| 36.  | LP ( 1) 0 13        | /285. | BD*( 1) C 2 - C 12  | 2.23  | 1.08 | 0.044 |
| 36.  | LP ( 1) 0 13        | /296. | BD*( 1) C 12 - O 14 | 1.11  | 1.07 | 0.031 |
| 37.  | LP ( 2) 0 13        | /144. | RY*( 2) C 12        | 2.84  | 2.05 | 0.071 |
| 37.  | LP ( 2) 0 13        | /146. | RY*( 4) C 12        | 1.24  | 2.04 | 0.047 |
| 37.  | LP ( 2) 0 13        | /285. | BD*( 1) C 2 - C 12  | 17.05 | 0.65 | 0.096 |
| 37.  | LP ( 2) 0 13        | /296. | BD*( 1) C 12 - O 14 | 32.00 | 0.64 | 0.129 |
| 37.  | LP ( 2) 0 13        | /298. | BD*( 1) C 15 - H 16 | 0.78  | 0.67 | 0.021 |
| 38.  | LP ( 1) 0 14        | /143. | RY*( 1) C 12        | 2.44  | 1.54 | 0.055 |
| 38.  | LP ( 1) 0 14        | /146. | RY*( 4) C 12        | 2.43  | 2.33 | 0.068 |
| 38.  | LP ( 1) 0 14        | /194. | RY*( 1) C 15        | 2.14  | 1.58 | 0.052 |
| 38.  | LP ( 1) 0 14        | /294. | BD*( 1) C 12 - O 13 | 7.62  | 1.17 | 0.085 |
| 38.  | LP ( 1) 0 14        | /298. | BD*( 1) C 15 - H 16 | 2.28  | 0.96 | 0.042 |
| 38.  | LP ( 1) 0 14        | /299. | BD*( 1) C 15 - H 17 | 0.51  | 0.95 | 0.020 |
| 38.  | LP ( 1) 0 14        | /300. | BD*( 1) C 15 - H 18 | 0.58  | 0.95 | 0.021 |
| 39.  | LP ( 2) 0 14        | /145. | RY*( 3) C 12        | 2.51  | 1.92 | 0.065 |
| 39.  | LP ( 2) 0 14        | /195. | RY*( 2) C 15        | 1.74  | 1.61 | 0.050 |
| 39.  | LP ( 2) 0 14        | /295. | BD*( 2) C 12 - O 13 | 47.58 | 0.34 | 0.113 |
| 39.  | LP ( 2) 0 14        | /299. | BD*( 1) C 15 - H 17 | 4.60  | 0.72 | 0.054 |
| 39.  | LP ( 2) 0 14        | /300. | BD*( 1) C 15 - H 18 | 4.51  | 0.72 | 0.053 |
| 295. | BD*( 2) C 12 - O 13 | /145. | RY*( 3) C 12        | 1.64  | 1.58 | 0.135 |
| 295. | BD*( 2) C 12 - O 13 | /161. | RY*( 2) O 13        | 1.44  | 0.55 | 0.075 |
| 295. | BD*( 2) C 12 - O 13 | /284. | BD*( 1) C 2 - H 5   | 0.98  | 0.40 | 0.051 |
| 295. | BD*( 2) C 12 - O 13 | /287. | BD*( 1) C 2 - C 22  | 0.82  | 0.37 | 0.044 |

### 1-eq

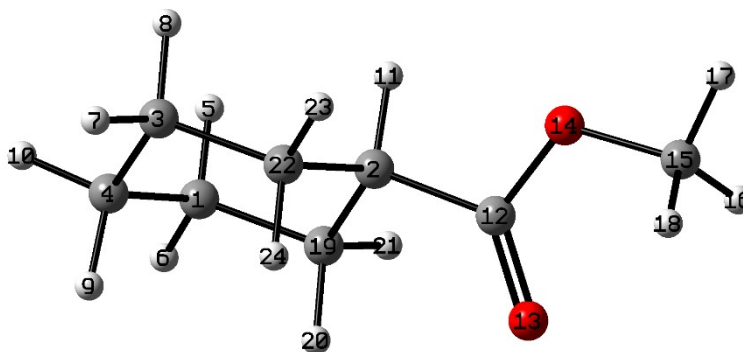

### Second Order Perturbation Theory Analysis of Fock Matrix in NBO Basis

Threshold for printing: 0.50 kcal/mol

| Donor NBO (i)         | Acceptor NBO (j)          | E(2)<br>kcal/mol | E(j)-E(i)<br>a.u. | F(i,j)<br>a.u. |
|-----------------------|---------------------------|------------------|-------------------|----------------|
| =====                 |                           |                  |                   |                |
| within unit 1         |                           |                  |                   |                |
| 1. BD ( 1) C 1 - C 4  | / 74. RY*( 1) C 3         | 0.97             | 1.43              | 0.033          |
| 1. BD ( 1) C 1 - C 4  | /226. RY*( 1) C 19        | 1.01             | 1.43              | 0.034          |
| 1. BD ( 1) C 1 - C 4  | /283. BD*( 1) C 1 - C 19  | 0.71             | 0.99              | 0.024          |
| 1. BD ( 1) C 1 - C 4  | /288. BD*( 1) C 3 - C 4   | 0.71             | 0.99              | 0.024          |
| 1. BD ( 1) C 1 - C 4  | /289. BD*( 1) C 3 - H 7   | 1.71             | 1.00              | 0.037          |
| 1. BD ( 1) C 1 - C 4  | /302. BD*( 1) C 19 - H 21 | 1.69             | 1.00              | 0.037          |
| 2. BD ( 1) C 1 - H 5  | /292. BD*( 1) C 4 - H 9   | 2.80             | 0.88              | 0.044          |
| 2. BD ( 1) C 1 - H 5  | /301. BD*( 1) C 19 - H 20 | 2.84             | 0.89              | 0.045          |
| 3. BD ( 1) C 1 - H 6  | /286. BD*( 1) C 2 - C 19  | 2.98             | 0.87              | 0.045          |
| 3. BD ( 1) C 1 - H 6  | /288. BD*( 1) C 3 - C 4   | 2.92             | 0.88              | 0.045          |
| 4. BD ( 1) C 1 - C 19 | / 57. RY*( 1) C 2         | 0.59             | 1.43              | 0.026          |
| 4. BD ( 1) C 1 - C 19 | / 91. RY*( 1) C 4         | 0.98             | 1.45              | 0.034          |
| 4. BD ( 1) C 1 - C 19 | /280. BD*( 1) C 1 - C 4   | 0.70             | 0.99              | 0.024          |
| 4. BD ( 1) C 1 - C 19 | /285. BD*( 1) C 2 - C 12  | 2.04             | 0.98              | 0.040          |
| 4. BD ( 1) C 1 - C 19 | /286. BD*( 1) C 2 - C 19  | 0.88             | 0.98              | 0.026          |
| 4. BD ( 1) C 1 - C 19 | /293. BD*( 1) C 4 - H 10  | 1.65             | 1.00              | 0.036          |
| 5. BD ( 1) C 2 - H 11 | /294. BD*( 1) C 12 - O 13 | 4.03             | 1.08              | 0.059          |
| 5. BD ( 1) C 2 - H 11 | /295. BD*( 2) C 12 - O 13 | 2.55             | 0.50              | 0.033          |
| 5. BD ( 1) C 2 - H 11 | /296. BD*( 1) C 12 - O 14 | 0.71             | 0.85              | 0.022          |
| 5. BD ( 1) C 2 - H 11 | /301. BD*( 1) C 19 - H 20 | 2.73             | 0.90              | 0.044          |
| 5. BD ( 1) C 2 - H 11 | /304. BD*( 1) C 22 - H 24 | 2.74             | 0.89              | 0.044          |

|                         |                           |      |      |       |
|-------------------------|---------------------------|------|------|-------|
| 6. BD ( 1) C 2 - C 12   | /160. RY*( 1) 0 13        | 1.21 | 1.39 | 0.037 |
| 6. BD ( 1) C 2 - C 12   | /177. RY*( 1) 0 14        | 0.67 | 1.26 | 0.026 |
| 6. BD ( 1) C 2 - C 12   | /182. RY*( 6) 0 14        | 0.56 | 2.01 | 0.030 |
| 6. BD ( 1) C 2 - C 12   | /227. RY*( 2) C 19        | 0.79 | 1.44 | 0.030 |
| 6. BD ( 1) C 2 - C 12   | /254. RY*( 2) C 22        | 0.63 | 1.64 | 0.029 |
| 6. BD ( 1) C 2 - C 12   | /283. BD*( 1) C 1 - C 19  | 1.77 | 1.04 | 0.038 |
| 6. BD ( 1) C 2 - C 12   | /286. BD*( 1) C 2 - C 19  | 0.55 | 1.03 | 0.021 |
| 6. BD ( 1) C 2 - C 12   | /287. BD*( 1) C 2 - C 22  | 0.67 | 1.01 | 0.023 |
| 6. BD ( 1) C 2 - C 12   | /291. BD*( 1) C 3 - C 22  | 1.89 | 1.04 | 0.040 |
| 6. BD ( 1) C 2 - C 12   | /294. BD*( 1) C 12 - 0 13 | 1.56 | 1.24 | 0.039 |
| 6. BD ( 1) C 2 - C 12   | /297. BD*( 1) 0 14 - C 15 | 4.19 | 0.90 | 0.055 |
| 7. BD ( 1) C 2 - C 19   | / 40. RY*( 1) C 1         | 1.05 | 1.44 | 0.035 |
| 7. BD ( 1) C 2 - C 19   | /143. RY*( 1) C 12        | 1.12 | 1.55 | 0.037 |
| 7. BD ( 1) C 2 - C 19   | /253. RY*( 1) C 22        | 0.97 | 1.45 | 0.034 |
| 7. BD ( 1) C 2 - C 19   | /282. BD*( 1) C 1 - H 6   | 1.50 | 1.01 | 0.035 |
| 7. BD ( 1) C 2 - C 19   | /283. BD*( 1) C 1 - C 19  | 0.67 | 0.99 | 0.023 |
| 7. BD ( 1) C 2 - C 19   | /284. BD*( 1) C 2 - H 11  | 0.59 | 1.00 | 0.022 |
| 7. BD ( 1) C 2 - C 19   | /285. BD*( 1) C 2 - C 12  | 0.64 | 0.98 | 0.023 |
| 7. BD ( 1) C 2 - C 19   | /287. BD*( 1) C 2 - C 22  | 1.14 | 0.96 | 0.030 |
| 7. BD ( 1) C 2 - C 19   | /295. BD*( 2) C 12 - 0 13 | 0.78 | 0.61 | 0.020 |
| 7. BD ( 1) C 2 - C 19   | /296. BD*( 1) C 12 - 0 14 | 2.35 | 0.96 | 0.043 |
| 7. BD ( 1) C 2 - C 19   | /303. BD*( 1) C 22 - H 23 | 1.59 | 1.01 | 0.036 |
| 8. BD ( 1) C 2 - C 22   | / 74. RY*( 1) C 3         | 1.04 | 1.43 | 0.035 |
| 8. BD ( 1) C 2 - C 22   | /147. RY*( 5) C 12        | 1.06 | 1.53 | 0.036 |
| 8. BD ( 1) C 2 - C 22   | /226. RY*( 1) C 19        | 1.08 | 1.43 | 0.035 |
| 8. BD ( 1) C 2 - C 22   | /284. BD*( 1) C 2 - H 11  | 0.55 | 0.99 | 0.021 |
| 8. BD ( 1) C 2 - C 22   | /285. BD*( 1) C 2 - C 12  | 0.57 | 0.98 | 0.021 |
| 8. BD ( 1) C 2 - C 22   | /286. BD*( 1) C 2 - C 19  | 1.03 | 0.98 | 0.028 |
| 8. BD ( 1) C 2 - C 22   | /289. BD*( 1) C 3 - H 7   | 1.52 | 1.00 | 0.035 |
| 8. BD ( 1) C 2 - C 22   | /291. BD*( 1) C 3 - C 22  | 0.57 | 0.98 | 0.021 |
| 8. BD ( 1) C 2 - C 22   | /294. BD*( 1) C 12 - 0 13 | 1.27 | 1.18 | 0.035 |
| 8. BD ( 1) C 2 - C 22   | /295. BD*( 2) C 12 - 0 13 | 3.76 | 0.60 | 0.044 |
| 8. BD ( 1) C 2 - C 22   | /302. BD*( 1) C 19 - H 21 | 1.73 | 1.00 | 0.037 |
| 9. BD ( 1) C 3 - C 4    | / 40. RY*( 1) C 1         | 0.97 | 1.43 | 0.033 |
| 9. BD ( 1) C 3 - C 4    | /253. RY*( 1) C 22        | 1.06 | 1.45 | 0.035 |
| 9. BD ( 1) C 3 - C 4    | /280. BD*( 1) C 1 - C 4   | 0.70 | 0.99 | 0.024 |
| 9. BD ( 1) C 3 - C 4    | /282. BD*( 1) C 1 - H 6   | 1.70 | 1.00 | 0.037 |
| 9. BD ( 1) C 3 - C 4    | /291. BD*( 1) C 3 - C 22  | 0.71 | 0.99 | 0.024 |
| 9. BD ( 1) C 3 - C 4    | /303. BD*( 1) C 22 - H 23 | 1.68 | 1.01 | 0.037 |
| 10. BD ( 1) C 3 - H 7   | /280. BD*( 1) C 1 - C 4   | 2.90 | 0.88 | 0.045 |
| 10. BD ( 1) C 3 - H 7   | /287. BD*( 1) C 2 - C 22  | 3.06 | 0.85 | 0.046 |
| 11. BD ( 1) C 3 - H 8   | /292. BD*( 1) C 4 - H 9   | 2.79 | 0.88 | 0.044 |
| 11. BD ( 1) C 3 - H 8   | /304. BD*( 1) C 22 - H 24 | 2.90 | 0.88 | 0.045 |
| 12. BD ( 1) C 3 - C 22  | / 58. RY*( 2) C 2         | 0.74 | 1.52 | 0.030 |
| 12. BD ( 1) C 3 - C 22  | / 91. RY*( 1) C 4         | 1.01 | 1.45 | 0.034 |
| 12. BD ( 1) C 3 - C 22  | /285. BD*( 1) C 2 - C 12  | 1.83 | 0.98 | 0.038 |
| 12. BD ( 1) C 3 - C 22  | /287. BD*( 1) C 2 - C 22  | 0.80 | 0.96 | 0.025 |
| 12. BD ( 1) C 3 - C 22  | /288. BD*( 1) C 3 - C 4   | 0.71 | 0.99 | 0.024 |
| 12. BD ( 1) C 3 - C 22  | /293. BD*( 1) C 4 - H 10  | 1.63 | 1.01 | 0.036 |
| 12. BD ( 1) C 3 - C 22  | /303. BD*( 1) C 22 - H 23 | 0.50 | 1.01 | 0.020 |
| 13. BD ( 1) C 4 - H 9   | /281. BD*( 1) C 1 - H 5   | 2.85 | 0.88 | 0.045 |
| 13. BD ( 1) C 4 - H 9   | /290. BD*( 1) C 3 - H 8   | 2.86 | 0.88 | 0.045 |
| 14. BD ( 1) C 4 - H 10  | /283. BD*( 1) C 1 - C 19  | 2.99 | 0.88 | 0.046 |
| 14. BD ( 1) C 4 - H 10  | /291. BD*( 1) C 3 - C 22  | 3.02 | 0.88 | 0.046 |
| 15. BD ( 1) C 12 - 0 13 | / 57. RY*( 1) C 2         | 0.62 | 1.93 | 0.031 |
| 15. BD ( 1) C 12 - 0 13 | /143. RY*( 1) C 12        | 1.78 | 2.04 | 0.054 |
| 15. BD ( 1) C 12 - 0 13 | /285. BD*( 1) C 2 - C 12  | 1.68 | 1.48 | 0.045 |
| 16. BD ( 2) C 12 - 0 13 | /284. BD*( 1) C 2 - H 11  | 0.63 | 0.80 | 0.020 |
| 16. BD ( 2) C 12 - 0 13 | /287. BD*( 1) C 2 - C 22  | 1.15 | 0.77 | 0.027 |
| 16. BD ( 2) C 12 - 0 13 | /295. BD*( 2) C 12 - 0 13 | 0.74 | 0.41 | 0.016 |
| 17. BD ( 1) C 12 - 0 14 | / 57. RY*( 1) C 2         | 0.80 | 1.77 | 0.034 |
| 17. BD ( 1) C 12 - 0 14 | /196. RY*( 3) C 15        | 1.51 | 1.76 | 0.046 |
| 17. BD ( 1) C 12 - 0 14 | /286. BD*( 1) C 2 - C 19  | 0.91 | 1.32 | 0.031 |
| 18. BD ( 1) 0 14 - C 15 | /143. RY*( 1) C 12        | 1.39 | 1.78 | 0.045 |
| 18. BD ( 1) 0 14 - C 15 | /285. BD*( 1) C 2 - C 12  | 2.42 | 1.21 | 0.049 |
| 19. BD ( 1) C 15 - H 16 | /178. RY*( 2) 0 14        | 0.66 | 1.27 | 0.026 |
| 19. BD ( 1) C 15 - H 16 | /297. BD*( 1) 0 14 - C 15 | 0.63 | 0.78 | 0.020 |
| 20. BD ( 1) C 15 - H 17 | /180. RY*( 4) 0 14        | 0.57 | 1.80 | 0.029 |
| 20. BD ( 1) C 15 - H 17 | /296. BD*( 1) C 12 - 0 14 | 2.87 | 0.89 | 0.046 |
| 21. BD ( 1) C 15 - H 18 | /178. RY*( 2) 0 14        | 0.61 | 1.27 | 0.025 |
| 21. BD ( 1) C 15 - H 18 | /297. BD*( 1) 0 14 - C 15 | 0.66 | 0.78 | 0.020 |
| 22. BD ( 1) C 19 - H 20 | / 59. RY*( 3) C 2         | 0.50 | 1.45 | 0.024 |
| 22. BD ( 1) C 19 - H 20 | /281. BD*( 1) C 1 - H 5   | 2.76 | 0.88 | 0.044 |
| 22. BD ( 1) C 19 - H 20 | /284. BD*( 1) C 2 - H 11  | 3.00 | 0.88 | 0.046 |



|                          |                           |       |       |       |
|--------------------------|---------------------------|-------|-------|-------|
| 23. BD ( 1) C 19 - H 21  | /280. BD*( 1) C 1 - C 4   | 2.91  | 0.88  | 0.045 |
| 23. BD ( 1) C 19 - H 21  | /287. BD*( 1) C 2 - C 22  | 3.16  | 0.85  | 0.046 |
| 24. BD ( 1) C 22 - H 23  | /286. BD*( 1) C 2 - C 19  | 2.96  | 0.88  | 0.045 |
| 24. BD ( 1) C 22 - H 23  | /288. BD*( 1) C 3 - C 4   | 2.86  | 0.89  | 0.045 |
| 25. BD ( 1) C 22 - H 24  | / 57. RY*( 1) C 2         | 0.67  | 1.33  | 0.027 |
| 25. BD ( 1) C 22 - H 24  | /284. BD*( 1) C 2 - H 11  | 2.66  | 0.89  | 0.043 |
| 25. BD ( 1) C 22 - H 24  | /290. BD*( 1) C 3 - H 8   | 2.69  | 0.89  | 0.044 |
| 26. CR ( 1) C 1          | / 94. RY*( 4) C 4         | 0.59  | 11.10 | 0.072 |
| 26. CR ( 1) C 1          | /227. RY*( 2) C 19        | 0.55  | 10.82 | 0.069 |
| 27. CR ( 1) C 2          | /149. RY*( 7) C 12        | 0.70  | 11.05 | 0.079 |
| 27. CR ( 1) C 2          | /255. RY*( 3) C 22        | 0.59  | 11.00 | 0.072 |
| 27. CR ( 1) C 2          | /294. BD*( 1) C 12 - 0 13 | 0.77  | 10.64 | 0.081 |
| 29. CR ( 1) C 4          | / 76. RY*( 3) C 3         | 0.56  | 11.20 | 0.071 |
| 30. CR ( 1) C 12         | / 58. RY*( 2) C 2         | 0.70  | 11.11 | 0.079 |
| 30. CR ( 1) C 12         | /297. BD*( 1) 0 14 - C 15 | 1.19  | 10.44 | 0.100 |
| 31. CR ( 1) 0 13         | /143. RY*( 1) C 12        | 7.09  | 19.81 | 0.336 |
| 31. CR ( 1) 0 13         | /285. BD*( 1) C 2 - C 12  | 0.70  | 19.24 | 0.105 |
| 32. CR ( 1) 0 14         | /143. RY*( 1) C 12        | 1.29  | 19.93 | 0.144 |
| 32. CR ( 1) 0 14         | /144. RY*( 2) C 12        | 0.83  | 20.71 | 0.118 |
| 32. CR ( 1) 0 14         | /146. RY*( 4) C 12        | 0.98  | 20.74 | 0.128 |
| 32. CR ( 1) 0 14         | /194. RY*( 1) C 15        | 0.59  | 19.99 | 0.097 |
| 32. CR ( 1) 0 14         | /196. RY*( 3) C 15        | 0.59  | 19.80 | 0.097 |
| 33. CR ( 1) C 15         | /217. RY*( 2) H 17        | 0.50  | 12.14 | 0.070 |
| 33. CR ( 1) C 15         | /296. BD*( 1) C 12 - 0 14 | 0.82  | 10.46 | 0.085 |
| 33. CR ( 1) C 15         | /297. BD*( 1) 0 14 - C 15 | 1.79  | 10.35 | 0.122 |
| 34. CR ( 1) C 19         | / 42. RY*( 3) C 1         | 0.54  | 11.15 | 0.069 |
| 34. CR ( 1) C 19         | / 58. RY*( 2) C 2         | 0.65  | 10.95 | 0.075 |
| 35. CR ( 1) C 22         | / 59. RY*( 3) C 2         | 0.70  | 11.00 | 0.078 |
| 35. CR ( 1) C 22         | / 76. RY*( 3) C 3         | 0.76  | 11.21 | 0.083 |
| 36. LP ( 1) 0 13         | /143. RY*( 1) C 12        | 17.23 | 1.66  | 0.151 |
| 36. LP ( 1) 0 13         | /157. RY*( 15) C 12       | 0.78  | 3.39  | 0.046 |
| 36. LP ( 1) 0 13         | /158. RY*( 16) C 12       | 0.62  | 3.39  | 0.041 |
| 36. LP ( 1) 0 13         | /285. BD*( 1) C 2 - C 12  | 2.32  | 1.10  | 0.045 |
| 36. LP ( 1) 0 13         | /296. BD*( 1) C 12 - 0 14 | 1.16  | 1.07  | 0.032 |
| 37. LP ( 2) 0 13         | /144. RY*( 2) C 12        | 2.80  | 2.01  | 0.069 |
| 37. LP ( 2) 0 13         | /146. RY*( 4) C 12        | 1.30  | 2.05  | 0.048 |
| 37. LP ( 2) 0 13         | /285. BD*( 1) C 2 - C 12  | 16.41 | 0.66  | 0.095 |
| 37. LP ( 2) 0 13         | /296. BD*( 1) C 12 - 0 14 | 32.04 | 0.64  | 0.129 |
| 37. LP ( 2) 0 13         | /299. BD*( 1) C 15 - H 17 | 0.78  | 0.67  | 0.021 |
| 38. LP ( 1) 0 14         | /143. RY*( 1) C 12        | 2.61  | 1.53  | 0.057 |
| 38. LP ( 1) 0 14         | /146. RY*( 4) C 12        | 2.29  | 2.34  | 0.066 |
| 38. LP ( 1) 0 14         | /194. RY*( 1) C 15        | 2.15  | 1.59  | 0.053 |
| 38. LP ( 1) 0 14         | /294. BD*( 1) C 12 - 0 13 | 7.78  | 1.17  | 0.085 |
| 38. LP ( 1) 0 14         | /299. BD*( 1) C 15 - H 17 | 2.27  | 0.96  | 0.042 |
| 38. LP ( 1) 0 14         | /300. BD*( 1) C 15 - H 18 | 0.59  | 0.96  | 0.021 |
| 39. LP ( 2) 0 14         | /145. RY*( 3) C 12        | 2.60  | 1.91  | 0.066 |
| 39. LP ( 2) 0 14         | /195. RY*( 2) C 15        | 1.71  | 1.56  | 0.049 |
| 39. LP ( 2) 0 14         | /295. BD*( 2) C 12 - 0 13 | 46.36 | 0.34  | 0.113 |
| 39. LP ( 2) 0 14         | /298. BD*( 1) C 15 - H 16 | 4.64  | 0.72  | 0.054 |
| 39. LP ( 2) 0 14         | /300. BD*( 1) C 15 - H 18 | 4.39  | 0.72  | 0.053 |
| 295. BD*( 2) C 12 - 0 13 | /145. RY*( 3) C 12        | 1.53  | 1.56  | 0.130 |
| 295. BD*( 2) C 12 - 0 13 | /153. RY*( 11) C 12       | 0.55  | 2.52  | 0.100 |
| 295. BD*( 2) C 12 - 0 13 | /161. RY*( 2) 0 13        | 1.46  | 0.65  | 0.082 |
| 295. BD*( 2) C 12 - 0 13 | /287. BD*( 1) C 2 - C 22  | 1.23  | 0.36  | 0.054 |
| 295. BD*( 2) C 12 - 0 13 | /294. BD*( 1) C 12 - 0 13 | 1.02  | 0.58  | 0.062 |

## 2-ax

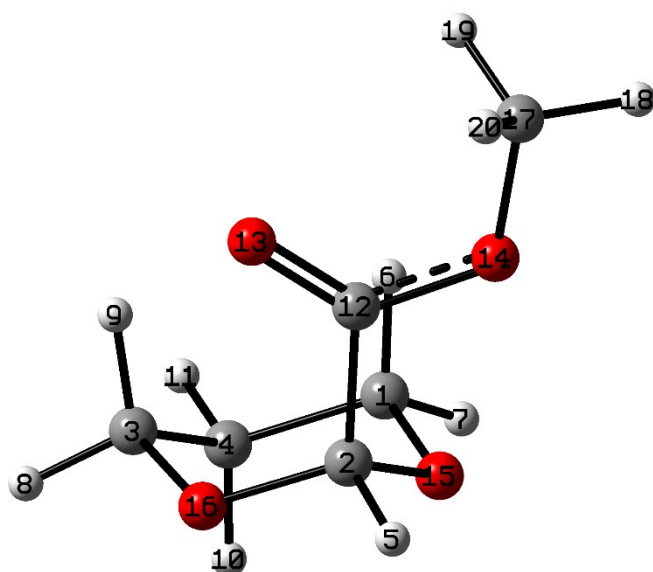

Second Order Perturbation Theory Analysis of Fock Matrix in NBO Basis

Threshold for printing: 0.50 kcal/mol

| Donor NBO (i)         | Acceptor NBO (j)          | E(2)<br>kcal/mol | E(j)-E(i)<br>a.u. | F(i,j)<br>a.u. |
|-----------------------|---------------------------|------------------|-------------------|----------------|
| =====                 |                           |                  |                   |                |
| within unit 1         |                           |                  |                   |                |
| 1. BD ( 1) C 1 - C 4  | / 75. RY*( 2) C 3         | 0.72             | 1.67              | 0.031          |
| 1. BD ( 1) C 1 - C 4  | /194. RY*( 1) O 15        | 0.87             | 1.29              | 0.030          |
| 1. BD ( 1) C 1 - C 4  | /268. BD*( 1) C 3 - C 4   | 0.52             | 1.01              | 0.020          |
| 1. BD ( 1) C 1 - C 4  | /269. BD*( 1) C 3 - H 8   | 1.68             | 1.03              | 0.037          |
| 1. BD ( 1) C 1 - C 4  | /271. BD*( 1) C 3 - O 16  | 0.54             | 0.90              | 0.020          |
| 2. BD ( 1) C 1 - H 6  | /263. BD*( 1) C 1 - O 15  | 0.55             | 0.79              | 0.019          |
| 2. BD ( 1) C 1 - H 6  | /272. BD*( 1) C 4 - H 10  | 2.53             | 0.91              | 0.043          |
| 3. BD ( 1) C 1 - H 7  | /195. RY*( 2) O 15        | 0.79             | 1.31              | 0.029          |
| 3. BD ( 1) C 1 - H 7  | /266. BD*( 1) C 2 - O 15  | 3.01             | 0.81              | 0.044          |
| 3. BD ( 1) C 1 - H 7  | /268. BD*( 1) C 3 - C 4   | 2.40             | 0.90              | 0.041          |
| 4. BD ( 1) C 1 - O 15 | / 57. RY*( 1) C 2         | 1.88             | 1.82              | 0.052          |
| 4. BD ( 1) C 1 - O 15 | / 58. RY*( 2) C 2         | 0.75             | 2.18              | 0.036          |
| 4. BD ( 1) C 1 - O 15 | /264. BD*( 1) C 2 - H 5   | 0.97             | 1.18              | 0.030          |
| 4. BD ( 1) C 1 - O 15 | /273. BD*( 1) C 4 - H 11  | 1.10             | 1.20              | 0.032          |
| 5. BD ( 1) C 2 - H 5  | /148. RY*( 6) C 12        | 0.57             | 1.96              | 0.030          |
| 5. BD ( 1) C 2 - H 5  | /263. BD*( 1) C 1 - O 15  | 3.74             | 0.80              | 0.049          |
| 5. BD ( 1) C 2 - H 5  | /271. BD*( 1) C 3 - O 16  | 3.96             | 0.80              | 0.050          |
| 5. BD ( 1) C 2 - H 5  | /274. BD*( 1) C 12 - O 13 | 1.49             | 1.13              | 0.037          |
| 5. BD ( 1) C 2 - H 5  | /275. BD*( 2) C 12 - O 13 | 5.24             | 0.53              | 0.049          |
| 6. BD ( 1) C 2 - C 12 | /160. RY*( 1) O 13        | 1.33             | 1.43              | 0.039          |
| 6. BD ( 1) C 2 - C 12 | /177. RY*( 1) O 14        | 0.77             | 1.28              | 0.028          |
| 6. BD ( 1) C 2 - C 12 | /274. BD*( 1) C 12 - O 13 | 0.75             | 1.25              | 0.027          |
| 6. BD ( 1) C 2 - C 12 | /277. BD*( 1) O 14 - C 17 | 4.32             | 0.90              | 0.056          |
| 7. BD ( 1) C 2 - O 15 | / 40. RY*( 1) C 1         | 2.02             | 1.71              | 0.052          |
| 7. BD ( 1) C 2 - O 15 | /262. BD*( 1) C 1 - H 7   | 0.72             | 1.25              | 0.027          |
| 7. BD ( 1) C 2 - O 15 | /274. BD*( 1) C 12 - O 13 | 1.16             | 1.44              | 0.037          |
| 7. BD ( 1) C 2 - O 15 | /275. BD*( 2) C 12 - O 13 | 0.54             | 0.85              | 0.020          |
| 8. BD ( 1) C 2 - O 16 | / 74. RY*( 1) C 3         | 1.94             | 1.72              | 0.052          |
| 8. BD ( 1) C 2 - O 16 | /269. BD*( 1) C 3 - H 8   | 0.62             | 1.26              | 0.025          |
| 8. BD ( 1) C 2 - O 16 | /276. BD*( 1) C 12 - O 14 | 1.20             | 1.23              | 0.035          |
| 9. BD ( 1) C 3 - C 4  | / 41. RY*( 2) C 1         | 0.81             | 1.69              | 0.033          |
| 9. BD ( 1) C 3 - C 4  | /211. RY*( 1) O 16        | 0.78             | 1.33              | 0.029          |
| 9. BD ( 1) C 3 - C 4  | /260. BD*( 1) C 1 - C 4   | 0.53             | 1.00              | 0.021          |
| 9. BD ( 1) C 3 - C 4  | /262. BD*( 1) C 1 - H 7   | 1.72             | 1.02              | 0.037          |
| 9. BD ( 1) C 3 - C 4  | /263. BD*( 1) C 1 - O 15  | 0.53             | 0.90              | 0.020          |
| 10. BD ( 1) C 3 - H 8 | /212. RY*( 2) O 16        | 0.68             | 1.32              | 0.027          |
| 10. BD ( 1) C 3 - H 8 | /260. BD*( 1) C 1 - C 4   | 2.42             | 0.89              | 0.042          |

|                         |                           |       |       |       |
|-------------------------|---------------------------|-------|-------|-------|
| 10. BD ( 1) C 3 - H 8   | /267. BD*( 1) C 2 - 0 16  | 3.05  | 0.82  | 0.045 |
| 11. BD ( 1) C 3 - H 9   | /271. BD*( 1) C 3 - 0 16  | 0.52  | 0.78  | 0.018 |
| 11. BD ( 1) C 3 - H 9   | /272. BD*( 1) C 4 - H 10  | 2.58  | 0.91  | 0.043 |
| 12. BD ( 1) C 3 - 0 16  | / 57. RY*( 1) C 2         | 1.47  | 1.82  | 0.046 |
| 12. BD ( 1) C 3 - 0 16  | / 58. RY*( 2) C 2         | 0.66  | 2.17  | 0.034 |
| 12. BD ( 1) C 3 - 0 16  | / 59. RY*( 3) C 2         | 0.58  | 2.10  | 0.031 |
| 12. BD ( 1) C 3 - 0 16  | /264. BD*( 1) C 2 - H 5   | 1.00  | 1.18  | 0.031 |
| 12. BD ( 1) C 3 - 0 16  | /273. BD*( 1) C 4 - H 11  | 1.08  | 1.19  | 0.032 |
| 13. BD ( 1) C 4 - H 10  | / 40. RY*( 1) C 1         | 0.60  | 1.36  | 0.026 |
| 13. BD ( 1) C 4 - H 10  | / 74. RY*( 1) C 3         | 0.65  | 1.36  | 0.027 |
| 13. BD ( 1) C 4 - H 10  | /261. BD*( 1) C 1 - H 6   | 2.65  | 0.87  | 0.043 |
| 13. BD ( 1) C 4 - H 10  | /270. BD*( 1) C 3 - H 9   | 2.53  | 0.88  | 0.042 |
| 14. BD ( 1) C 4 - H 11  | /263. BD*( 1) C 1 - 0 15  | 3.98  | 0.77  | 0.050 |
| 14. BD ( 1) C 4 - H 11  | /271. BD*( 1) C 3 - 0 16  | 4.03  | 0.77  | 0.050 |
| 15. BD ( 1) C 12 - 0 13 | / 57. RY*( 1) C 2         | 0.54  | 2.13  | 0.030 |
| 15. BD ( 1) C 12 - 0 13 | /143. RY*( 1) C 12        | 1.64  | 2.12  | 0.053 |
| 15. BD ( 1) C 12 - 0 13 | /265. BD*( 1) C 2 - C 12  | 0.72  | 1.41  | 0.029 |
| 16. BD ( 2) C 12 - 0 13 | /178. RY*( 2) O 14        | 0.54  | 1.20  | 0.023 |
| 16. BD ( 2) C 12 - 0 13 | /264. BD*( 1) C 2 - H 5   | 1.06  | 0.79  | 0.026 |
| 16. BD ( 2) C 12 - 0 13 | /266. BD*( 1) C 2 - 0 15  | 1.27  | 0.71  | 0.027 |
| 16. BD ( 2) C 12 - 0 13 | /275. BD*( 2) C 12 - 0 13 | 0.67  | 0.41  | 0.016 |
| 17. BD ( 1) C 12 - 0 14 | / 57. RY*( 1) C 2         | 0.60  | 1.97  | 0.031 |
| 17. BD ( 1) C 12 - 0 14 | /229. RY*( 2) C 17        | 0.51  | 2.04  | 0.029 |
| 17. BD ( 1) C 12 - 0 14 | /230. RY*( 3) C 17        | 0.84  | 1.99  | 0.036 |
| 17. BD ( 1) C 12 - 0 14 | /267. BD*( 1) C 2 - 0 16  | 0.73  | 1.26  | 0.027 |
| 17. BD ( 1) C 12 - 0 14 | /274. BD*( 1) C 12 - 0 13 | 0.52  | 1.55  | 0.025 |
| 18. BD ( 1) O 14 - C 17 | /143. RY*( 1) C 12        | 1.60  | 1.84  | 0.048 |
| 18. BD ( 1) O 14 - C 17 | /147. RY*( 5) C 12        | 0.69  | 1.87  | 0.032 |
| 18. BD ( 1) O 14 - C 17 | /265. BD*( 1) C 2 - C 12  | 2.48  | 1.13  | 0.048 |
| 19. BD ( 1) C 17 - H 18 | /276. BD*( 1) C 12 - 0 14 | 2.85  | 0.90  | 0.046 |
| 20. BD ( 1) C 17 - H 19 | /178. RY*( 2) O 14        | 0.60  | 1.33  | 0.025 |
| 20. BD ( 1) C 17 - H 19 | /277. BD*( 1) O 14 - C 17 | 0.71  | 0.78  | 0.021 |
| 21. BD ( 1) C 17 - H 20 | /178. RY*( 2) O 14        | 0.61  | 1.33  | 0.025 |
| 21. BD ( 1) C 17 - H 20 | /277. BD*( 1) O 14 - C 17 | 0.71  | 0.78  | 0.021 |
| 22. CR ( 1) C 1         | / 93. RY*( 3) C 4         | 0.87  | 11.21 | 0.088 |
| 22. CR ( 1) C 1         | /263. BD*( 1) C 1 - 0 15  | 1.27  | 10.37 | 0.103 |
| 22. CR ( 1) C 1         | /266. BD*( 1) C 2 - 0 15  | 0.83  | 10.39 | 0.084 |
| 23. CR ( 1) C 2         | /263. BD*( 1) C 1 - 0 15  | 1.00  | 10.45 | 0.092 |
| 23. CR ( 1) C 2         | /264. BD*( 1) C 2 - H 5   | 0.78  | 10.56 | 0.081 |
| 23. CR ( 1) C 2         | /271. BD*( 1) C 3 - 0 16  | 1.04  | 10.45 | 0.093 |
| 23. CR ( 1) C 2         | /274. BD*( 1) C 12 - 0 13 | 0.57  | 10.78 | 0.070 |
| 24. CR ( 1) C 3         | / 93. RY*( 3) C 4         | 0.77  | 11.21 | 0.083 |
| 24. CR ( 1) C 3         | /267. BD*( 1) C 2 - 0 16  | 0.83  | 10.40 | 0.084 |
| 24. CR ( 1) C 3         | /271. BD*( 1) C 3 - 0 16  | 1.32  | 10.37 | 0.105 |
| 25. CR ( 1) C 4         | / 46. RY*( 7) C 1         | 0.68  | 10.96 | 0.077 |
| 25. CR ( 1) C 4         | / 80. RY*( 7) C 3         | 0.63  | 11.02 | 0.074 |
| 25. CR ( 1) C 4         | /133. RY*( 1) H 10        | 0.51  | 11.20 | 0.068 |
| 26. CR ( 1) C 12        | / 58. RY*( 2) C 2         | 0.64  | 11.58 | 0.077 |
| 26. CR ( 1) C 12        | /277. BD*( 1) O 14 - C 17 | 1.26  | 10.44 | 0.103 |
| 27. CR ( 1) O 13        | /143. RY*( 1) C 12        | 6.99  | 19.88 | 0.334 |
| 27. CR ( 1) O 13        | /265. BD*( 1) C 2 - C 12  | 0.56  | 19.17 | 0.095 |
| 28. CR ( 1) O 14        | /143. RY*( 1) C 12        | 1.47  | 20.00 | 0.154 |
| 28. CR ( 1) O 14        | /144. RY*( 2) C 12        | 0.73  | 20.84 | 0.111 |
| 28. CR ( 1) O 14        | /146. RY*( 4) C 12        | 0.92  | 20.87 | 0.123 |
| 28. CR ( 1) O 14        | /228. RY*( 1) C 17        | 0.57  | 19.95 | 0.095 |
| 28. CR ( 1) O 14        | /274. BD*( 1) C 12 - 0 13 | 0.52  | 19.58 | 0.091 |
| 29. CR ( 1) O 15        | / 40. RY*( 1) C 1         | 1.05  | 19.80 | 0.129 |
| 29. CR ( 1) O 15        | / 57. RY*( 1) C 2         | 1.56  | 19.96 | 0.158 |
| 30. CR ( 1) O 16        | / 57. RY*( 1) C 2         | 1.87  | 19.96 | 0.173 |
| 30. CR ( 1) O 16        | / 74. RY*( 1) C 3         | 0.60  | 19.81 | 0.097 |
| 30. CR ( 1) O 16        | / 75. RY*( 2) C 3         | 0.72  | 19.98 | 0.107 |
| 31. CR ( 1) C 17        | /246. RY*( 2) H 18        | 0.59  | 12.22 | 0.076 |
| 31. CR ( 1) C 17        | /276. BD*( 1) C 12 - 0 14 | 0.84  | 10.48 | 0.086 |
| 31. CR ( 1) C 17        | /277. BD*( 1) O 14 - C 17 | 1.85  | 10.35 | 0.124 |
| 32. LP ( 1) O 13        | /143. RY*( 1) C 12        | 17.03 | 1.73  | 0.153 |
| 32. LP ( 1) O 13        | /156. RY*( 14) C 12       | 0.94  | 7.83  | 0.077 |
| 32. LP ( 1) O 13        | /265. BD*( 1) C 2 - C 12  | 1.74  | 1.03  | 0.038 |
| 32. LP ( 1) O 13        | /276. BD*( 1) C 12 - 0 14 | 1.33  | 1.09  | 0.035 |
| 33. LP ( 2) O 13        | /144. RY*( 2) C 12        | 3.21  | 2.14  | 0.077 |
| 33. LP ( 2) O 13        | /146. RY*( 4) C 12        | 0.90  | 2.17  | 0.041 |
| 33. LP ( 2) O 13        | /265. BD*( 1) C 2 - C 12  | 20.47 | 0.59  | 0.099 |
| 33. LP ( 2) O 13        | /276. BD*( 1) C 12 - 0 14 | 30.65 | 0.66  | 0.128 |
| 33. LP ( 2) O 13        | /278. BD*( 1) C 17 - H 18 | 0.69  | 0.68  | 0.020 |
| 34. LP ( 1) O 14        | /143. RY*( 1) C 12        | 2.63  | 1.59  | 0.058 |

|                          |                           |       |      |       |
|--------------------------|---------------------------|-------|------|-------|
| 34. LP ( 1) 0 14         | /146. RY*( 4) C 12        | 2.19  | 2.46 | 0.066 |
| 34. LP ( 1) 0 14         | /228. RY*( 1) C 17        | 2.07  | 1.55 | 0.051 |
| 34. LP ( 1) 0 14         | /265. BD*( 1) C 2 - C 12  | 0.94  | 0.89 | 0.026 |
| 34. LP ( 1) 0 14         | /274. BD*( 1) C 12 - 0 13 | 8.05  | 1.17 | 0.087 |
| 34. LP ( 1) 0 14         | /278. BD*( 1) C 17 - H 18 | 2.25  | 0.97 | 0.042 |
| 34. LP ( 1) 0 14         | /279. BD*( 1) C 17 - H 19 | 0.53  | 0.96 | 0.020 |
| 35. LP ( 2) 0 14         | /145. RY*( 3) C 12        | 2.78  | 1.93 | 0.069 |
| 35. LP ( 2) 0 14         | /150. RY*( 8) C 12        | 0.56  | 1.20 | 0.025 |
| 35. LP ( 2) 0 14         | /229. RY*( 2) C 17        | 1.17  | 1.43 | 0.039 |
| 35. LP ( 2) 0 14         | /230. RY*( 3) C 17        | 0.81  | 1.38 | 0.032 |
| 35. LP ( 2) 0 14         | /275. BD*( 2) C 12 - 0 13 | 49.43 | 0.34 | 0.116 |
| 35. LP ( 2) 0 14         | /279. BD*( 1) C 17 - H 19 | 4.32  | 0.72 | 0.053 |
| 35. LP ( 2) 0 14         | /280. BD*( 1) C 17 - H 20 | 4.32  | 0.72 | 0.053 |
| 36. LP ( 1) 0 15         | / 40. RY*( 1) C 1         | 1.33  | 1.44 | 0.039 |
| 36. LP ( 1) 0 15         | / 41. RY*( 2) C 1         | 1.02  | 1.64 | 0.037 |
| 36. LP ( 1) 0 15         | / 57. RY*( 1) C 2         | 2.24  | 1.60 | 0.054 |
| 36. LP ( 1) 0 15         | / 59. RY*( 3) C 2         | 0.78  | 1.88 | 0.034 |
| 36. LP ( 1) 0 15         | /260. BD*( 1) C 1 - C 4   | 0.74  | 0.96 | 0.024 |
| 36. LP ( 1) 0 15         | /261. BD*( 1) C 1 - H 6   | 0.80  | 0.95 | 0.025 |
| 36. LP ( 1) 0 15         | /262. BD*( 1) C 1 - H 7   | 2.43  | 0.98 | 0.044 |
| 36. LP ( 1) 0 15         | /264. BD*( 1) C 2 - H 5   | 2.90  | 0.96 | 0.047 |
| 36. LP ( 1) 0 15         | /265. BD*( 1) C 2 - C 12  | 1.31  | 0.88 | 0.031 |
| 36. LP ( 1) 0 15         | /267. BD*( 1) C 2 - 0 16  | 1.28  | 0.88 | 0.030 |
| 37. LP ( 2) 0 15         | / 42. RY*( 3) C 1         | 1.12  | 1.82 | 0.041 |
| 37. LP ( 2) 0 15         | / 58. RY*( 2) C 2         | 0.79  | 1.69 | 0.033 |
| 37. LP ( 2) 0 15         | / 60. RY*( 4) C 2         | 0.59  | 1.84 | 0.030 |
| 37. LP ( 2) 0 15         | / 61. RY*( 5) C 2         | 0.50  | 2.19 | 0.030 |
| 37. LP ( 2) 0 15         | /260. BD*( 1) C 1 - C 4   | 4.49  | 0.69 | 0.051 |
| 37. LP ( 2) 0 15         | /261. BD*( 1) C 1 - H 6   | 5.69  | 0.69 | 0.057 |
| 37. LP ( 2) 0 15         | /265. BD*( 1) C 2 - C 12  | 7.55  | 0.62 | 0.061 |
| 37. LP ( 2) 0 15         | /267. BD*( 1) C 2 - 0 16  | 10.34 | 0.62 | 0.072 |
| 37. LP ( 2) 0 15         | /273. BD*( 1) C 4 - H 11  | 0.59  | 0.71 | 0.019 |
| 37. LP ( 2) 0 15         | /275. BD*( 2) C 12 - 0 13 | 0.59  | 0.31 | 0.013 |
| 38. LP ( 1) 0 16         | / 57. RY*( 1) C 2         | 3.05  | 1.59 | 0.063 |
| 38. LP ( 1) 0 16         | / 59. RY*( 3) C 2         | 0.61  | 1.87 | 0.030 |
| 38. LP ( 1) 0 16         | / 74. RY*( 1) C 3         | 0.58  | 1.44 | 0.026 |
| 38. LP ( 1) 0 16         | / 75. RY*( 2) C 3         | 1.57  | 1.61 | 0.045 |
| 38. LP ( 1) 0 16         | / 76. RY*( 3) C 3         | 0.56  | 2.09 | 0.031 |
| 38. LP ( 1) 0 16         | /264. BD*( 1) C 2 - H 5   | 3.02  | 0.95 | 0.048 |
| 38. LP ( 1) 0 16         | /265. BD*( 1) C 2 - C 12  | 1.20  | 0.88 | 0.029 |
| 38. LP ( 1) 0 16         | /266. BD*( 1) C 2 - 0 15  | 1.47  | 0.86 | 0.032 |
| 38. LP ( 1) 0 16         | /268. BD*( 1) C 3 - C 4   | 0.85  | 0.95 | 0.026 |
| 38. LP ( 1) 0 16         | /269. BD*( 1) C 3 - H 8   | 2.47  | 0.97 | 0.044 |
| 38. LP ( 1) 0 16         | /270. BD*( 1) C 3 - H 9   | 0.68  | 0.96 | 0.023 |
| 39. LP ( 2) 0 16         | / 58. RY*( 2) C 2         | 0.87  | 1.69 | 0.035 |
| 39. LP ( 2) 0 16         | / 60. RY*( 4) C 2         | 0.72  | 1.84 | 0.033 |
| 39. LP ( 2) 0 16         | / 76. RY*( 3) C 3         | 1.08  | 1.83 | 0.041 |
| 39. LP ( 2) 0 16         | /265. BD*( 1) C 2 - C 12  | 7.69  | 0.62 | 0.062 |
| 39. LP ( 2) 0 16         | /266. BD*( 1) C 2 - 0 15  | 10.50 | 0.60 | 0.072 |
| 39. LP ( 2) 0 16         | /268. BD*( 1) C 3 - C 4   | 4.27  | 0.69 | 0.049 |
| 39. LP ( 2) 0 16         | /270. BD*( 1) C 3 - H 9   | 5.70  | 0.70 | 0.057 |
| 39. LP ( 2) 0 16         | /273. BD*( 1) C 4 - H 11  | 0.54  | 0.70 | 0.018 |
| 39. LP ( 2) 0 16         | /276. BD*( 1) C 12 - 0 14 | 0.70  | 0.68 | 0.019 |
| 265. BD*( 1) C 2 - C 12  | / 58. RY*( 2) C 2         | 0.70  | 1.07 | 0.103 |
| 265. BD*( 1) C 2 - C 12  | / 62. RY*( 6) C 2         | 0.60  | 0.92 | 0.091 |
| 265. BD*( 1) C 2 - C 12  | /147. RY*( 5) C 12        | 1.04  | 0.73 | 0.107 |
| 265. BD*( 1) C 2 - C 12  | /264. BD*( 1) C 2 - H 5   | 0.67  | 0.07 | 0.024 |
| 275. BD*( 2) C 12 - 0 13 | /145. RY*( 3) C 12        | 1.72  | 1.58 | 0.138 |
| 275. BD*( 2) C 12 - 0 13 | /161. RY*( 2) 0 13        | 1.42  | 0.55 | 0.075 |
| 275. BD*( 2) C 12 - 0 13 | /264. BD*( 1) C 2 - H 5   | 0.90  | 0.38 | 0.047 |
| 275. BD*( 2) C 12 - 0 13 | /266. BD*( 1) C 2 - 0 15  | 1.32  | 0.29 | 0.048 |
| 275. BD*( 2) C 12 - 0 13 | /274. BD*( 1) C 12 - 0 13 | 0.93  | 0.60 | 0.060 |

## 2-eq

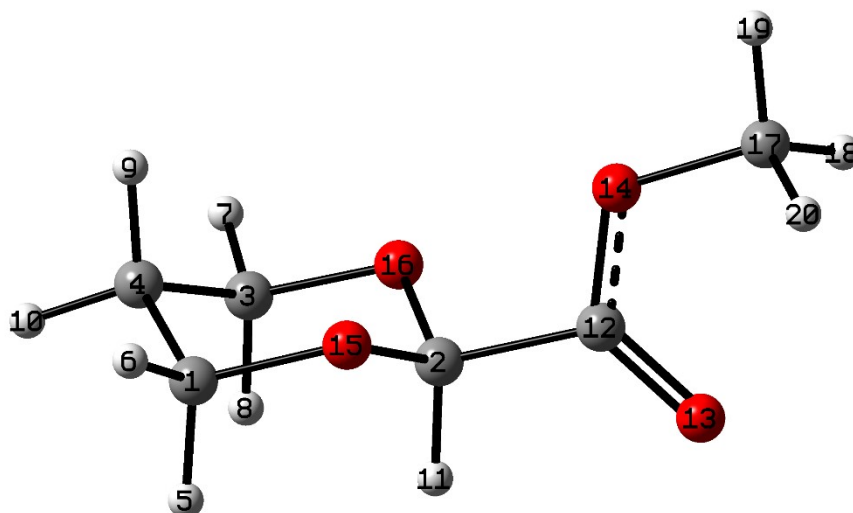

Second Order Perturbation Theory Analysis of Fock Matrix in NBO Basis

Threshold for printing: 0.50 kcal/mol

| Donor NBO (i)          | Acceptor NBO (j)          | E(2)<br>kcal/mol | E(j)-E(i)<br>a.u. | F(i,j)<br>a.u. |
|------------------------|---------------------------|------------------|-------------------|----------------|
| within unit 1          |                           |                  |                   |                |
| 1. BD ( 1) C 1 - C 4   | /194. RY*( 1) O 15        | 0.64             | 1.51              | 0.028          |
| 1. BD ( 1) C 1 - C 4   | /268. BD*( 1) C 3 - C 4   | 0.50             | 1.00              | 0.020          |
| 1. BD ( 1) C 1 - C 4   | /269. BD*( 1) C 3 - H 7   | 1.66             | 1.03              | 0.037          |
| 1. BD ( 1) C 1 - C 4   | /271. BD*( 1) C 3 - O 16  | 0.52             | 0.90              | 0.019          |
| 2. BD ( 1) C 1 - H 5   | /263. BD*( 1) C 1 - O 15  | 0.58             | 0.79              | 0.019          |
| 2. BD ( 1) C 1 - H 5   | /272. BD*( 1) C 4 - H 9   | 2.52             | 0.91              | 0.043          |
| 3. BD ( 1) C 1 - H 6   | /195. RY*( 2) O 15        | 0.54             | 1.23              | 0.023          |
| 3. BD ( 1) C 1 - H 6   | /266. BD*( 1) C 2 - O 15  | 2.75             | 0.81              | 0.043          |
| 3. BD ( 1) C 1 - H 6   | /268. BD*( 1) C 3 - C 4   | 2.44             | 0.89              | 0.042          |
| 4. BD ( 1) C 1 - O 15  | / 57. RY*( 1) C 2         | 0.65             | 1.72              | 0.030          |
| 4. BD ( 1) C 1 - O 15  | /265. BD*( 1) C 2 - C 12  | 1.53             | 1.13              | 0.038          |
| 4. BD ( 1) C 1 - O 15  | /273. BD*( 1) C 4 - H 10  | 1.07             | 1.19              | 0.032          |
| 5. BD ( 1) C 2 - H 11  | /276. BD*( 1) C 12 - O 14 | 3.50             | 0.92              | 0.052          |
| 6. BD ( 1) C 2 - C 12  | /160. RY*( 1) O 13        | 1.34             | 1.36              | 0.038          |
| 6. BD ( 1) C 2 - C 12  | /177. RY*( 1) O 14        | 0.61             | 1.41              | 0.026          |
| 6. BD ( 1) C 2 - C 12  | /182. RY*( 6) O 14        | 0.64             | 2.11              | 0.033          |
| 6. BD ( 1) C 2 - C 12  | /263. BD*( 1) C 1 - O 15  | 2.53             | 0.93              | 0.043          |
| 6. BD ( 1) C 2 - C 12  | /271. BD*( 1) C 3 - O 16  | 2.54             | 0.93              | 0.044          |
| 6. BD ( 1) C 2 - C 12  | /274. BD*( 1) C 12 - O 13 | 0.78             | 1.26              | 0.028          |
| 6. BD ( 1) C 2 - C 12  | /277. BD*( 1) O 14 - C 17 | 4.28             | 0.91              | 0.056          |
| 7. BD ( 1) C 2 - O 15  | / 41. RY*( 2) C 1         | 1.95             | 1.75              | 0.052          |
| 7. BD ( 1) C 2 - O 15  | /262. BD*( 1) C 1 - H 6   | 0.73             | 1.24              | 0.027          |
| 7. BD ( 1) C 2 - O 15  | /274. BD*( 1) C 12 - O 13 | 1.02             | 1.44              | 0.034          |
| 7. BD ( 1) C 2 - O 15  | /275. BD*( 2) C 12 - O 13 | 1.14             | 0.84              | 0.029          |
| 8. BD ( 1) C 2 - O 16  | / 75. RY*( 2) C 3         | 1.96             | 1.75              | 0.052          |
| 8. BD ( 1) C 2 - O 16  | /269. BD*( 1) C 3 - H 7   | 0.74             | 1.24              | 0.027          |
| 8. BD ( 1) C 2 - O 16  | /274. BD*( 1) C 12 - O 13 | 1.01             | 1.44              | 0.034          |
| 8. BD ( 1) C 2 - O 16  | /275. BD*( 2) C 12 - O 13 | 1.16             | 0.84              | 0.029          |
| 9. BD ( 1) C 3 - C 4   | /211. RY*( 1) O 16        | 0.64             | 1.51              | 0.028          |
| 9. BD ( 1) C 3 - C 4   | /262. BD*( 1) C 1 - H 6   | 1.65             | 1.03              | 0.037          |
| 9. BD ( 1) C 3 - C 4   | /263. BD*( 1) C 1 - O 15  | 0.52             | 0.90              | 0.019          |
| 10. BD ( 1) C 3 - H 7  | /212. RY*( 2) O 16        | 0.54             | 1.23              | 0.023          |
| 10. BD ( 1) C 3 - H 7  | /260. BD*( 1) C 1 - C 4   | 2.45             | 0.89              | 0.042          |
| 10. BD ( 1) C 3 - H 7  | /267. BD*( 1) C 2 - O 16  | 2.75             | 0.81              | 0.043          |
| 11. BD ( 1) C 3 - H 8  | /271. BD*( 1) C 3 - O 16  | 0.58             | 0.79              | 0.019          |
| 11. BD ( 1) C 3 - H 8  | /272. BD*( 1) C 4 - H 9   | 2.52             | 0.91              | 0.043          |
| 12. BD ( 1) C 3 - O 16 | / 57. RY*( 1) C 2         | 0.63             | 1.72              | 0.029          |
| 12. BD ( 1) C 3 - O 16 | /265. BD*( 1) C 2 - C 12  | 1.52             | 1.13              | 0.038          |
| 12. BD ( 1) C 3 - O 16 | /273. BD*( 1) C 4 - H 10  | 1.07             | 1.19              | 0.032          |
| 13. BD ( 1) C 4 - H 9  | / 41. RY*( 2) C 1         | 0.60             | 1.40              | 0.026          |
| 13. BD ( 1) C 4 - H 9  | / 75. RY*( 2) C 3         | 0.61             | 1.40              | 0.026          |
| 13. BD ( 1) C 4 - H 9  | /261. BD*( 1) C 1 - H 5   | 2.59             | 0.87              | 0.043          |
| 13. BD ( 1) C 4 - H 9  | /270. BD*( 1) C 3 - H 8   | 2.60             | 0.87              | 0.043          |
| 14. BD ( 1) C 4 - H 10 | /263. BD*( 1) C 1 - O 15  | 3.98             | 0.77              | 0.050          |

|                         |                           |       |       |       |
|-------------------------|---------------------------|-------|-------|-------|
| 14. BD ( 1) C 4 - H 10  | /271. BD*( 1) C 3 - 0 16  | 3.97  | 0.77  | 0.050 |
| 15. BD ( 1) C 12 - 0 13 | / 58. RY*( 2) C 2         | 0.64  | 2.29  | 0.034 |
| 15. BD ( 1) C 12 - 0 13 | /143. RY*( 1) C 12        | 1.58  | 2.13  | 0.052 |
| 15. BD ( 1) C 12 - 0 13 | /265. BD*( 1) C 2 - C 12  | 1.02  | 1.44  | 0.035 |
| 16. BD ( 2) C 12 - 0 13 | /178. RY*( 2) O 14        | 0.52  | 1.23  | 0.023 |
| 16. BD ( 2) C 12 - 0 13 | /266. BD*( 1) C 2 - 0 15  | 1.83  | 0.70  | 0.032 |
| 16. BD ( 2) C 12 - 0 13 | /267. BD*( 1) C 2 - 0 16  | 1.85  | 0.70  | 0.032 |
| 16. BD ( 2) C 12 - 0 13 | /275. BD*( 2) C 12 - 0 13 | 0.51  | 0.40  | 0.014 |
| 17. BD ( 1) C 12 - 0 14 | / 58. RY*( 2) C 2         | 0.72  | 2.15  | 0.035 |
| 17. BD ( 1) C 12 - 0 14 | /229. RY*( 2) C 17        | 1.48  | 1.85  | 0.047 |
| 17. BD ( 1) C 12 - 0 14 | /274. BD*( 1) C 12 - 0 13 | 0.59  | 1.56  | 0.027 |
| 18. BD ( 1) O 14 - C 17 | /143. RY*( 1) C 12        | 1.72  | 1.85  | 0.051 |
| 18. BD ( 1) O 14 - C 17 | /148. RY*( 6) C 12        | 0.80  | 1.85  | 0.034 |
| 18. BD ( 1) O 14 - C 17 | /265. BD*( 1) C 2 - C 12  | 2.72  | 1.16  | 0.051 |
| 19. BD ( 1) C 17 - H 18 | /178. RY*( 2) O 14        | 0.64  | 1.35  | 0.026 |
| 19. BD ( 1) C 17 - H 18 | /277. BD*( 1) O 14 - C 17 | 0.73  | 0.78  | 0.021 |
| 20. BD ( 1) C 17 - H 19 | /180. RY*( 4) O 14        | 0.67  | 2.04  | 0.033 |
| 20. BD ( 1) C 17 - H 19 | /276. BD*( 1) C 12 - 0 14 | 2.73  | 0.91  | 0.045 |
| 21. BD ( 1) C 17 - H 20 | /178. RY*( 2) O 14        | 0.64  | 1.35  | 0.026 |
| 21. BD ( 1) C 17 - H 20 | /277. BD*( 1) O 14 - C 17 | 0.73  | 0.78  | 0.021 |
| 22. CR ( 1) C 1         | / 93. RY*( 3) C 4         | 0.82  | 11.18 | 0.086 |
| 22. CR ( 1) C 1         | /263. BD*( 1) C 1 - 0 15  | 1.29  | 10.37 | 0.104 |
| 22. CR ( 1) C 1         | /266. BD*( 1) C 2 - 0 15  | 0.80  | 10.39 | 0.082 |
| 23. CR ( 1) C 2         | /148. RY*( 6) C 12        | 0.51  | 11.20 | 0.068 |
| 23. CR ( 1) C 2         | /263. BD*( 1) C 1 - 0 15  | 0.96  | 10.45 | 0.090 |
| 23. CR ( 1) C 2         | /271. BD*( 1) C 3 - 0 16  | 0.96  | 10.45 | 0.090 |
| 24. CR ( 1) C 3         | / 93. RY*( 3) C 4         | 0.82  | 11.18 | 0.086 |
| 24. CR ( 1) C 3         | /267. BD*( 1) C 2 - 0 16  | 0.80  | 10.39 | 0.082 |
| 24. CR ( 1) C 3         | /271. BD*( 1) C 3 - 0 16  | 1.29  | 10.37 | 0.104 |
| 25. CR ( 1) C 4         | / 46. RY*( 7) C 1         | 0.51  | 11.19 | 0.068 |
| 25. CR ( 1) C 4         | / 80. RY*( 7) C 3         | 0.52  | 11.18 | 0.068 |
| 25. CR ( 1) C 4         | /128. RY*( 1) H 9         | 0.53  | 11.22 | 0.069 |
| 26. CR ( 1) C 12        | / 62. RY*( 6) C 2         | 1.39  | 11.38 | 0.112 |
| 26. CR ( 1) C 12        | /277. BD*( 1) O 14 - C 17 | 1.27  | 10.45 | 0.103 |
| 27. CR ( 1) O 13        | /143. RY*( 1) C 12        | 6.68  | 19.89 | 0.327 |
| 27. CR ( 1) O 13        | /265. BD*( 1) C 2 - C 12  | 0.62  | 19.20 | 0.100 |
| 28. CR ( 1) O 14        | /143. RY*( 1) C 12        | 1.57  | 20.01 | 0.159 |
| 28. CR ( 1) O 14        | /144. RY*( 2) C 12        | 0.67  | 20.84 | 0.106 |
| 28. CR ( 1) O 14        | /146. RY*( 4) C 12        | 0.91  | 20.96 | 0.123 |
| 28. CR ( 1) O 14        | /228. RY*( 1) C 17        | 0.51  | 20.00 | 0.091 |
| 28. CR ( 1) O 14        | /229. RY*( 2) C 17        | 0.68  | 19.88 | 0.104 |
| 28. CR ( 1) O 14        | /274. BD*( 1) C 12 - 0 13 | 0.55  | 19.58 | 0.093 |
| 29. CR ( 1) O 15        | / 40. RY*( 1) C 1         | 0.95  | 19.98 | 0.123 |
| 29. CR ( 1) O 15        | / 57. RY*( 1) C 2         | 1.59  | 19.86 | 0.159 |
| 29. CR ( 1) O 15        | / 58. RY*( 2) C 2         | 0.65  | 20.13 | 0.102 |
| 30. CR ( 1) O 16        | / 57. RY*( 1) C 2         | 1.55  | 19.86 | 0.157 |
| 30. CR ( 1) O 16        | / 58. RY*( 2) C 2         | 0.69  | 20.13 | 0.105 |
| 30. CR ( 1) O 16        | / 74. RY*( 1) C 3         | 0.93  | 19.98 | 0.122 |
| 31. CR ( 1) C 17        | /251. RY*( 2) H 19        | 0.73  | 12.25 | 0.084 |
| 31. CR ( 1) C 17        | /276. BD*( 1) C 12 - 0 14 | 0.78  | 10.49 | 0.083 |
| 31. CR ( 1) C 17        | /277. BD*( 1) O 14 - C 17 | 1.89  | 10.35 | 0.125 |
| 32. LP ( 1) O 13        | /143. RY*( 1) C 12        | 16.20 | 1.75  | 0.150 |
| 32. LP ( 1) O 13        | /159. RY*( 17) C 12       | 1.23  | 4.44  | 0.066 |
| 32. LP ( 1) O 13        | /265. BD*( 1) C 2 - C 12  | 1.86  | 1.06  | 0.040 |
| 32. LP ( 1) O 13        | /276. BD*( 1) C 12 - 0 14 | 1.38  | 1.10  | 0.035 |
| 33. LP ( 2) O 13        | /144. RY*( 2) C 12        | 3.10  | 2.15  | 0.075 |
| 33. LP ( 2) O 13        | /146. RY*( 4) C 12        | 0.69  | 2.27  | 0.037 |
| 33. LP ( 2) O 13        | /265. BD*( 1) C 2 - C 12  | 18.26 | 0.62  | 0.097 |
| 33. LP ( 2) O 13        | /276. BD*( 1) C 12 - 0 14 | 29.91 | 0.67  | 0.128 |
| 33. LP ( 2) O 13        | /279. BD*( 1) C 17 - H 19 | 0.68  | 0.68  | 0.020 |
| 34. LP ( 1) O 14        | /143. RY*( 1) C 12        | 2.48  | 1.61  | 0.057 |
| 34. LP ( 1) O 14        | /146. RY*( 4) C 12        | 2.27  | 2.56  | 0.069 |
| 34. LP ( 1) O 14        | /228. RY*( 1) C 17        | 2.04  | 1.59  | 0.051 |
| 34. LP ( 1) O 14        | /229. RY*( 2) C 17        | 0.54  | 1.47  | 0.025 |
| 34. LP ( 1) O 14        | /265. BD*( 1) C 2 - C 12  | 0.93  | 0.91  | 0.026 |
| 34. LP ( 1) O 14        | /274. BD*( 1) C 12 - 0 13 | 8.38  | 1.18  | 0.089 |
| 34. LP ( 1) O 14        | /278. BD*( 1) C 17 - H 18 | 0.52  | 0.96  | 0.020 |
| 34. LP ( 1) O 14        | /279. BD*( 1) C 17 - H 19 | 2.25  | 0.97  | 0.042 |
| 35. LP ( 2) O 14        | /145. RY*( 3) C 12        | 2.96  | 1.94  | 0.072 |
| 35. LP ( 2) O 14        | /150. RY*( 8) C 12        | 0.54  | 1.89  | 0.030 |
| 35. LP ( 2) O 14        | /230. RY*( 3) C 17        | 1.68  | 1.69  | 0.051 |
| 35. LP ( 2) O 14        | /275. BD*( 2) C 12 - 0 13 | 52.22 | 0.33  | 0.118 |
| 35. LP ( 2) O 14        | /278. BD*( 1) C 17 - H 18 | 4.25  | 0.72  | 0.052 |
| 35. LP ( 2) O 14        | /280. BD*( 1) C 17 - H 20 | 4.29  | 0.72  | 0.053 |

|                          |                          |       |      |       |
|--------------------------|--------------------------|-------|------|-------|
| 36. LP ( 1) 0 15         | / 40. RY*( 1) C 1        | 2.14  | 1.62 | 0.053 |
| 36. LP ( 1) 0 15         | / 42. RY*( 3) C 1        | 0.52  | 2.11 | 0.030 |
| 36. LP ( 1) 0 15         | / 57. RY*( 1) C 2        | 1.80  | 1.50 | 0.047 |
| 36. LP ( 1) 0 15         | / 58. RY*( 2) C 2        | 0.66  | 1.77 | 0.031 |
| 36. LP ( 1) 0 15         | / 61. RY*( 5) C 2        | 0.76  | 2.45 | 0.039 |
| 36. LP ( 1) 0 15         | /260. BD*( 1) C 1 - C 4  | 0.61  | 0.96 | 0.022 |
| 36. LP ( 1) 0 15         | /261. BD*( 1) C 1 - H 5  | 0.80  | 0.96 | 0.025 |
| 36. LP ( 1) 0 15         | /262. BD*( 1) C 1 - H 6  | 2.34  | 0.98 | 0.043 |
| 36. LP ( 1) 0 15         | /264. BD*( 1) C 2 - H 11 | 1.21  | 0.95 | 0.030 |
| 36. LP ( 1) 0 15         | /265. BD*( 1) C 2 - C 12 | 1.85  | 0.92 | 0.037 |
| 36. LP ( 1) 0 15         | /267. BD*( 1) C 2 - O 16 | 0.52  | 0.88 | 0.019 |
| 37. LP ( 2) 0 15         | / 40. RY*( 1) C 1        | 0.53  | 1.35 | 0.024 |
| 37. LP ( 2) 0 15         | / 42. RY*( 3) C 1        | 1.09  | 1.84 | 0.041 |
| 37. LP ( 2) 0 15         | / 60. RY*( 4) C 2        | 0.80  | 2.16 | 0.038 |
| 37. LP ( 2) 0 15         | /260. BD*( 1) C 1 - C 4  | 4.68  | 0.69 | 0.052 |
| 37. LP ( 2) 0 15         | /261. BD*( 1) C 1 - H 5  | 5.18  | 0.69 | 0.054 |
| 37. LP ( 2) 0 15         | /264. BD*( 1) C 2 - H 11 | 5.26  | 0.68 | 0.054 |
| 37. LP ( 2) 0 15         | /267. BD*( 1) C 2 - O 16 | 12.41 | 0.61 | 0.078 |
| 37. LP ( 2) 0 15         | /273. BD*( 1) C 4 - H 10 | 0.57  | 0.71 | 0.018 |
| 38. LP ( 1) 0 16         | / 57. RY*( 1) C 2        | 1.75  | 1.50 | 0.046 |
| 38. LP ( 1) 0 16         | / 58. RY*( 2) C 2        | 0.70  | 1.77 | 0.032 |
| 38. LP ( 1) 0 16         | / 61. RY*( 5) C 2        | 0.76  | 2.45 | 0.039 |
| 38. LP ( 1) 0 16         | / 74. RY*( 1) C 3        | 2.12  | 1.62 | 0.053 |
| 38. LP ( 1) 0 16         | / 76. RY*( 3) C 3        | 0.53  | 2.11 | 0.030 |
| 38. LP ( 1) 0 16         | /264. BD*( 1) C 2 - H 11 | 1.22  | 0.95 | 0.030 |
| 38. LP ( 1) 0 16         | /265. BD*( 1) C 2 - C 12 | 1.84  | 0.92 | 0.037 |
| 38. LP ( 1) 0 16         | /266. BD*( 1) C 2 - O 15 | 0.51  | 0.88 | 0.019 |
| 38. LP ( 1) 0 16         | /268. BD*( 1) C 3 - C 4  | 0.60  | 0.96 | 0.022 |
| 38. LP ( 1) 0 16         | /269. BD*( 1) C 3 - H 7  | 2.34  | 0.98 | 0.043 |
| 38. LP ( 1) 0 16         | /270. BD*( 1) C 3 - H 8  | 0.80  | 0.96 | 0.025 |
| 39. LP ( 2) 0 16         | / 60. RY*( 4) C 2        | 0.80  | 2.16 | 0.038 |
| 39. LP ( 2) 0 16         | / 74. RY*( 1) C 3        | 0.52  | 1.35 | 0.024 |
| 39. LP ( 2) 0 16         | / 76. RY*( 3) C 3        | 1.09  | 1.84 | 0.041 |
| 39. LP ( 2) 0 16         | /264. BD*( 1) C 2 - H 11 | 5.25  | 0.68 | 0.054 |
| 39. LP ( 2) 0 16         | /266. BD*( 1) C 2 - O 15 | 12.43 | 0.61 | 0.078 |
| 39. LP ( 2) 0 16         | /268. BD*( 1) C 3 - C 4  | 4.69  | 0.69 | 0.052 |
| 39. LP ( 2) 0 16         | /270. BD*( 1) C 3 - H 8  | 5.17  | 0.69 | 0.054 |
| 39. LP ( 2) 0 16         | /273. BD*( 1) C 4 - H 10 | 0.58  | 0.71 | 0.018 |
| 275. BD*( 2) C 12 - O 13 | /145. RY*( 3) C 12       | 1.64  | 1.61 | 0.136 |
| 275. BD*( 2) C 12 - O 13 | /161. RY*( 2) O 13       | 1.63  | 0.54 | 0.079 |
| 275. BD*( 2) C 12 - O 13 | /266. BD*( 1) C 2 - O 15 | 1.62  | 0.30 | 0.053 |
| 275. BD*( 2) C 12 - O 13 | /267. BD*( 1) C 2 - O 16 | 1.64  | 0.30 | 0.053 |

### 3-ax

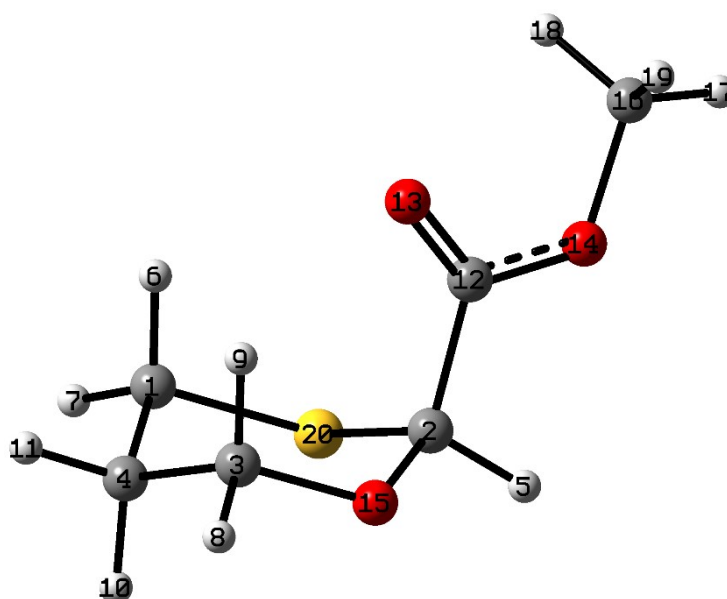

Second Order Perturbation Theory Analysis of Fock Matrix in NBO Basis

Threshold for printing: 0.50 kcal/mol

| Donor NBO (i) |                     | Acceptor NBO (j) |                     | E(2)<br>kcal/mol | E(j)-E(i)<br>a.u. | F(i,j)<br>a.u. |
|---------------|---------------------|------------------|---------------------|------------------|-------------------|----------------|
| =====         |                     |                  |                     |                  |                   |                |
| within unit 1 |                     |                  |                     |                  |                   |                |
| 1.            | BD ( 1) C 1 - C 4   | / 78.            | RY*( 1) C 3         | 1.22             | 1.53              | 0.039          |
| 1.            | BD ( 1) C 1 - C 4   | /270.            | BD*( 1) C 1 - H 7   | 0.55             | 1.03              | 0.021          |
| 1.            | BD ( 1) C 1 - C 4   | /276.            | BD*( 1) C 3 - C 4   | 0.55             | 1.02              | 0.021          |
| 1.            | BD ( 1) C 1 - C 4   | /277.            | BD*( 1) C 3 - H 8   | 1.35             | 1.03              | 0.033          |
| 2.            | BD ( 1) C 1 - H 6   | /247.            | RY*( 1) S 20        | 0.58             | 1.12              | 0.023          |
| 2.            | BD ( 1) C 1 - H 6   | /280.            | BD*( 1) C 4 - H 10  | 2.60             | 0.92              | 0.044          |
| 3.            | BD ( 1) C 1 - H 7   | / 96.            | RY*( 2) C 4         | 0.59             | 1.16              | 0.023          |
| 3.            | BD ( 1) C 1 - H 7   | /248.            | RY*( 2) S 20        | 0.55             | 1.32              | 0.024          |
| 3.            | BD ( 1) C 1 - H 7   | /275.            | BD*( 1) C 2 - S 20  | 1.33             | 0.64              | 0.026          |
| 3.            | BD ( 1) C 1 - H 7   | /276.            | BD*( 1) C 3 - C 4   | 2.82             | 0.90              | 0.045          |
| 4.            | BD ( 1) C 1 - S 20  | / 95.            | RY*( 1) C 4         | 0.97             | 1.36              | 0.033          |
| 4.            | BD ( 1) C 1 - S 20  | /272.            | BD*( 1) C 2 - H 5   | 1.07             | 0.98              | 0.029          |
| 4.            | BD ( 1) C 1 - S 20  | /281.            | BD*( 1) C 4 - H 11  | 2.32             | 0.98              | 0.043          |
| 5.            | BD ( 1) C 2 - H 5   | /199.            | RY*( 2) O 15        | 0.91             | 1.40              | 0.032          |
| 5.            | BD ( 1) C 2 - H 5   | /271.            | BD*( 1) C 1 - S 20  | 1.04             | 0.68              | 0.024          |
| 5.            | BD ( 1) C 2 - H 5   | /279.            | BD*( 1) C 3 - O 15  | 4.43             | 0.80              | 0.053          |
| 5.            | BD ( 1) C 2 - H 5   | /282.            | BD*( 1) C 12 - O 13 | 4.88             | 1.12              | 0.066          |
| 5.            | BD ( 1) C 2 - H 5   | /283.            | BD*( 2) C 12 - O 13 | 0.72             | 0.54              | 0.019          |
| 5.            | BD ( 1) C 2 - H 5   | /284.            | BD*( 1) C 12 - O 14 | 0.76             | 0.90              | 0.024          |
| 6.            | BD ( 1) C 2 - C 12  | /164.            | RY*( 1) O 13        | 1.11             | 1.47              | 0.036          |
| 6.            | BD ( 1) C 2 - C 12  | /181.            | RY*( 1) O 14        | 0.74             | 1.19              | 0.027          |
| 6.            | BD ( 1) C 2 - C 12  | /186.            | RY*( 6) O 14        | 0.54             | 2.12              | 0.030          |
| 6.            | BD ( 1) C 2 - C 12  | /282.            | BD*( 1) C 12 - O 13 | 1.30             | 1.26              | 0.036          |
| 6.            | BD ( 1) C 2 - C 12  | /285.            | BD*( 1) O 14 - C 16 | 4.12             | 0.92              | 0.055          |
| 7.            | BD ( 1) C 2 - O 15  | / 78.            | RY*( 1) C 3         | 0.84             | 1.77              | 0.035          |
| 7.            | BD ( 1) C 2 - O 15  | / 79.            | RY*( 2) C 3         | 0.99             | 1.81              | 0.038          |
| 7.            | BD ( 1) C 2 - O 15  | /284.            | BD*( 1) C 12 - O 14 | 1.04             | 1.24              | 0.033          |
| 8.            | BD ( 1) C 2 - S 20  | / 44.            | RY*( 1) C 1         | 0.60             | 1.39              | 0.026          |
| 8.            | BD ( 1) C 2 - S 20  | /151.            | RY*( 5) C 12        | 0.78             | 1.39              | 0.030          |
| 8.            | BD ( 1) C 2 - S 20  | /198.            | RY*( 1) O 15        | 1.24             | 1.26              | 0.035          |
| 8.            | BD ( 1) C 2 - S 20  | /270.            | BD*( 1) C 1 - H 7   | 1.22             | 0.98              | 0.031          |
| 8.            | BD ( 1) C 2 - S 20  | /283.            | BD*( 2) C 12 - O 13 | 5.52             | 0.58              | 0.053          |
| 9.            | BD ( 1) C 3 - C 4   | / 44.            | RY*( 1) C 1         | 0.99             | 1.43              | 0.034          |
| 9.            | BD ( 1) C 3 - C 4   | /198.            | RY*( 1) O 15        | 0.92             | 1.30              | 0.031          |
| 9.            | BD ( 1) C 3 - C 4   | /268.            | BD*( 1) C 1 - C 4   | 0.67             | 1.00              | 0.023          |
| 9.            | BD ( 1) C 3 - C 4   | /270.            | BD*( 1) C 1 - H 7   | 1.74             | 1.02              | 0.038          |
| 10.           | BD ( 1) C 3 - H 8   | /199.            | RY*( 2) O 15        | 0.52             | 1.37              | 0.024          |
| 10.           | BD ( 1) C 3 - H 8   | /268.            | BD*( 1) C 1 - C 4   | 2.99             | 0.89              | 0.046          |
| 10.           | BD ( 1) C 3 - H 8   | /274.            | BD*( 1) C 2 - O 15  | 3.58             | 0.81              | 0.048          |
| 11.           | BD ( 1) C 3 - H 9   | /279.            | BD*( 1) C 3 - O 15  | 0.56             | 0.78              | 0.019          |
| 11.           | BD ( 1) C 3 - H 9   | /280.            | BD*( 1) C 4 - H 10  | 2.74             | 0.91              | 0.045          |
| 12.           | BD ( 1) C 3 - O 15  | / 61.            | RY*( 1) C 2         | 1.42             | 1.62              | 0.043          |
| 12.           | BD ( 1) C 3 - O 15  | / 62.            | RY*( 2) C 2         | 0.90             | 1.81              | 0.036          |
| 12.           | BD ( 1) C 3 - O 15  | /272.            | BD*( 1) C 2 - H 5   | 0.95             | 1.19              | 0.030          |
| 12.           | BD ( 1) C 3 - O 15  | /281.            | BD*( 1) C 4 - H 11  | 0.90             | 1.19              | 0.029          |
| 13.           | BD ( 1) C 4 - H 10  | /269.            | BD*( 1) C 1 - H 6   | 2.85             | 0.89              | 0.045          |
| 13.           | BD ( 1) C 4 - H 10  | /278.            | BD*( 1) C 3 - H 9   | 2.49             | 0.89              | 0.042          |
| 14.           | BD ( 1) C 4 - H 11  | /271.            | BD*( 1) C 1 - S 20  | 4.91             | 0.64              | 0.050          |
| 14.           | BD ( 1) C 4 - H 11  | /279.            | BD*( 1) C 3 - O 15  | 4.97             | 0.76              | 0.055          |
| 15.           | BD ( 1) C 12 - O 13 | /147.            | RY*( 1) C 12        | 1.64             | 2.02              | 0.052          |
| 15.           | BD ( 1) C 12 - O 13 | /273.            | BD*( 1) C 2 - C 12  | 1.31             | 1.44              | 0.040          |
| 16.           | BD ( 2) C 12 - O 13 | /274.            | BD*( 1) C 2 - O 15  | 0.56             | 0.71              | 0.018          |
| 16.           | BD ( 2) C 12 - O 13 | /275.            | BD*( 1) C 2 - S 20  | 1.73             | 0.53              | 0.027          |
| 16.           | BD ( 2) C 12 - O 13 | /283.            | BD*( 2) C 12 - O 13 | 0.81             | 0.41              | 0.017          |
| 17.           | BD ( 1) C 12 - O 14 | / 62.            | RY*( 2) C 2         | 0.50             | 1.96              | 0.028          |
| 17.           | BD ( 1) C 12 - O 14 | /217.            | RY*( 3) C 16        | 1.36             | 1.82              | 0.044          |
| 17.           | BD ( 1) C 12 - O 14 | /274.            | BD*( 1) C 2 - O 15  | 0.99             | 1.25              | 0.032          |
| 17.           | BD ( 1) C 12 - O 14 | /282.            | BD*( 1) C 12 - O 13 | 0.51             | 1.54              | 0.025          |
| 18.           | BD ( 1) O 14 - C 16 | /147.            | RY*( 1) C 12        | 1.59             | 1.75              | 0.047          |
| 18.           | BD ( 1) O 14 - C 16 | /273.            | BD*( 1) C 2 - C 12  | 2.59             | 1.16              | 0.050          |
| 19.           | BD ( 1) C 16 - H 17 | /284.            | BD*( 1) C 12 - O 14 | 2.82             | 0.89              | 0.046          |
| 20.           | BD ( 1) C 16 - H 18 | /182.            | RY*( 2) O 14        | 0.68             | 1.28              | 0.026          |
| 20.           | BD ( 1) C 16 - H 18 | /285.            | BD*( 1) O 14 - C 16 | 0.72             | 0.78              | 0.021          |
| 21.           | BD ( 1) C 16 - H 19 | /182.            | RY*( 2) O 14        | 0.56             | 1.28              | 0.024          |
| 21.           | BD ( 1) C 16 - H 19 | /285.            | BD*( 1) O 14 - C 16 | 0.69             | 0.78              | 0.021          |
| 22.           | CR ( 1) C 1         | / 97.            | RY*( 3) C 4         | 0.81             | 11.22             | 0.085          |
| 22.           | CR ( 1) C 1         | /271.            | BD*( 1) C 1 - S 20  | 1.21             | 10.22             | 0.100          |



|                  |                           |       |       |       |
|------------------|---------------------------|-------|-------|-------|
| 23. CR ( 1) C 2  | /148. RY*( 2) C 12        | 0.55  | 11.96 | 0.073 |
| 23. CR ( 1) C 2  | /154. RY*( 8) C 12        | 0.53  | 11.40 | 0.069 |
| 23. CR ( 1) C 2  | /272. BD*( 1) C 2 - H 5   | 0.83  | 10.55 | 0.084 |
| 23. CR ( 1) C 2  | /275. BD*( 1) C 2 - S 20  | 0.54  | 10.28 | 0.067 |
| 23. CR ( 1) C 2  | /279. BD*( 1) C 3 - O 15  | 1.12  | 10.43 | 0.097 |
| 23. CR ( 1) C 2  | /282. BD*( 1) C 12 - O 13 | 0.74  | 10.75 | 0.080 |
| 24. CR ( 1) C 3  | / 96. RY*( 2) C 4         | 0.52  | 10.74 | 0.067 |
| 24. CR ( 1) C 3  | / 97. RY*( 3) C 4         | 0.60  | 11.24 | 0.073 |
| 24. CR ( 1) C 3  | /274. BD*( 1) C 2 - O 15  | 0.92  | 10.39 | 0.088 |
| 24. CR ( 1) C 3  | /279. BD*( 1) C 3 - O 15  | 1.47  | 10.36 | 0.111 |
| 25. CR ( 1) C 4  | / 45. RY*( 2) C 1         | 1.06  | 10.82 | 0.096 |
| 26. CR ( 1) C 12 | / 61. RY*( 1) C 2         | 0.68  | 11.02 | 0.077 |
| 26. CR ( 1) C 12 | /285. BD*( 1) O 14 - C 16 | 1.22  | 10.45 | 0.101 |
| 27. CR ( 1) O 13 | /147. RY*( 1) C 12        | 7.01  | 19.78 | 0.334 |
| 27. CR ( 1) O 13 | /273. BD*( 1) C 2 - C 12  | 0.66  | 19.20 | 0.103 |
| 28. CR ( 1) O 14 | /147. RY*( 1) C 12        | 1.51  | 19.91 | 0.155 |
| 28. CR ( 1) O 14 | /148. RY*( 2) C 12        | 0.70  | 20.78 | 0.108 |
| 28. CR ( 1) O 14 | /150. RY*( 4) C 12        | 0.96  | 20.69 | 0.126 |
| 28. CR ( 1) O 14 | /215. RY*( 1) C 16        | 0.55  | 19.98 | 0.094 |
| 28. CR ( 1) O 14 | /217. RY*( 3) C 16        | 0.57  | 19.85 | 0.095 |
| 28. CR ( 1) O 14 | /282. BD*( 1) C 12 - O 13 | 0.54  | 19.57 | 0.092 |
| 29. CR ( 1) O 15 | / 61. RY*( 1) C 2         | 2.23  | 19.77 | 0.188 |
| 29. CR ( 1) O 15 | / 79. RY*( 2) C 3         | 1.30  | 19.89 | 0.143 |
| 30. CR ( 1) C 16 | /284. BD*( 1) C 12 - O 14 | 0.83  | 10.47 | 0.085 |
| 30. CR ( 1) C 16 | /285. BD*( 1) O 14 - C 16 | 1.84  | 10.35 | 0.124 |
| 36. LP ( 1) O 13 | /147. RY*( 1) C 12        | 16.86 | 1.64  | 0.149 |
| 36. LP ( 1) O 13 | /148. RY*( 2) C 12        | 0.56  | 2.51  | 0.033 |
| 36. LP ( 1) O 13 | /163. RY*( 17) C 12       | 0.92  | 5.42  | 0.063 |
| 36. LP ( 1) O 13 | /273. BD*( 1) C 2 - C 12  | 2.16  | 1.05  | 0.043 |
| 36. LP ( 1) O 13 | /284. BD*( 1) C 12 - O 14 | 1.31  | 1.08  | 0.034 |
| 37. LP ( 2) O 13 | /148. RY*( 2) C 12        | 2.84  | 2.08  | 0.071 |
| 37. LP ( 2) O 13 | /150. RY*( 4) C 12        | 1.14  | 2.00  | 0.044 |
| 37. LP ( 2) O 13 | /273. BD*( 1) C 2 - C 12  | 18.85 | 0.62  | 0.098 |
| 37. LP ( 2) O 13 | /284. BD*( 1) C 12 - O 14 | 30.98 | 0.65  | 0.128 |
| 37. LP ( 2) O 13 | /286. BD*( 1) C 16 - H 17 | 0.68  | 0.68  | 0.020 |
| 38. LP ( 1) O 14 | /147. RY*( 1) C 12        | 2.89  | 1.50  | 0.059 |
| 38. LP ( 1) O 14 | /150. RY*( 4) C 12        | 2.18  | 2.29  | 0.064 |
| 38. LP ( 1) O 14 | /215. RY*( 1) C 16        | 2.12  | 1.58  | 0.052 |
| 38. LP ( 1) O 14 | /273. BD*( 1) C 2 - C 12  | 0.68  | 0.92  | 0.023 |
| 38. LP ( 1) O 14 | /274. BD*( 1) C 2 - O 15  | 0.50  | 0.88  | 0.019 |
| 38. LP ( 1) O 14 | /282. BD*( 1) C 12 - O 13 | 8.24  | 1.17  | 0.088 |
| 38. LP ( 1) O 14 | /286. BD*( 1) C 16 - H 17 | 2.24  | 0.97  | 0.042 |
| 38. LP ( 1) O 14 | /287. BD*( 1) C 16 - H 18 | 0.53  | 0.96  | 0.020 |
| 39. LP ( 2) O 14 | /149. RY*( 3) C 12        | 2.68  | 1.94  | 0.068 |
| 39. LP ( 2) O 14 | /153. RY*( 7) C 12        | 0.51  | 1.85  | 0.029 |
| 39. LP ( 2) O 14 | /216. RY*( 2) C 16        | 1.63  | 1.52  | 0.047 |
| 39. LP ( 2) O 14 | /283. BD*( 2) C 12 - O 13 | 48.46 | 0.34  | 0.115 |
| 39. LP ( 2) O 14 | /287. BD*( 1) C 16 - H 18 | 4.22  | 0.72  | 0.052 |
| 39. LP ( 2) O 14 | /288. BD*( 1) C 16 - H 19 | 4.45  | 0.72  | 0.053 |
| 40. LP ( 1) O 15 | / 61. RY*( 1) C 2         | 2.77  | 1.37  | 0.055 |
| 40. LP ( 1) O 15 | / 62. RY*( 2) C 2         | 0.59  | 1.56  | 0.027 |
| 40. LP ( 1) O 15 | / 65. RY*( 5) C 2         | 0.60  | 2.09  | 0.032 |
| 40. LP ( 1) O 15 | / 79. RY*( 2) C 3         | 1.91  | 1.49  | 0.048 |
| 40. LP ( 1) O 15 | / 80. RY*( 3) C 3         | 0.66  | 2.06  | 0.033 |
| 40. LP ( 1) O 15 | /272. BD*( 1) C 2 - H 5   | 3.32  | 0.94  | 0.050 |
| 40. LP ( 1) O 15 | /273. BD*( 1) C 2 - C 12  | 2.04  | 0.89  | 0.038 |
| 40. LP ( 1) O 15 | /275. BD*( 1) C 2 - S 20  | 2.17  | 0.67  | 0.034 |
| 40. LP ( 1) O 15 | /276. BD*( 1) C 3 - C 4   | 0.52  | 0.94  | 0.020 |
| 40. LP ( 1) O 15 | /277. BD*( 1) C 3 - H 8   | 2.59  | 0.95  | 0.045 |
| 40. LP ( 1) O 15 | /278. BD*( 1) C 3 - H 9   | 1.19  | 0.95  | 0.030 |
| 41. LP ( 2) O 15 | / 63. RY*( 3) C 2         | 1.57  | 1.68  | 0.047 |
| 41. LP ( 2) O 15 | / 64. RY*( 4) C 2         | 0.80  | 1.55  | 0.032 |
| 41. LP ( 2) O 15 | / 79. RY*( 2) C 3         | 0.64  | 1.26  | 0.026 |
| 41. LP ( 2) O 15 | / 80. RY*( 3) C 3         | 0.81  | 1.83  | 0.035 |
| 41. LP ( 2) O 15 | /273. BD*( 1) C 2 - C 12  | 6.62  | 0.66  | 0.059 |
| 41. LP ( 2) O 15 | /275. BD*( 1) C 2 - S 20  | 11.99 | 0.44  | 0.065 |
| 41. LP ( 2) O 15 | /276. BD*( 1) C 3 - C 4   | 5.09  | 0.71  | 0.055 |
| 41. LP ( 2) O 15 | /278. BD*( 1) C 3 - H 9   | 4.46  | 0.72  | 0.052 |
| 41. LP ( 2) O 15 | /281. BD*( 1) C 4 - H 11  | 0.52  | 0.71  | 0.017 |
| 42. LP ( 1) S 20 | / 64. RY*( 4) C 2         | 0.68  | 1.88  | 0.032 |
| 42. LP ( 1) S 20 | /268. BD*( 1) C 1 - C 4   | 0.69  | 1.03  | 0.024 |
| 42. LP ( 1) S 20 | /274. BD*( 1) C 2 - O 15  | 1.17  | 0.95  | 0.030 |
| 43. LP ( 2) S 20 | / 61. RY*( 1) C 2         | 0.54  | 1.06  | 0.022 |
| 43. LP ( 2) S 20 | /268. BD*( 1) C 1 - C 4   | 2.37  | 0.62  | 0.035 |

|                          |                           |      |      |       |
|--------------------------|---------------------------|------|------|-------|
| 43. LP ( 2) S 20         | /269. BD*( 1) C 1 - H 6   | 4.44 | 0.64 | 0.048 |
| 43. LP ( 2) S 20         | /273. BD*( 1) C 2 - C 12  | 3.88 | 0.58 | 0.042 |
| 43. LP ( 2) S 20         | /274. BD*( 1) C 2 - O 15  | 4.37 | 0.55 | 0.044 |
| 43. LP ( 2) S 20         | /281. BD*( 1) C 4 - H 11  | 0.71 | 0.64 | 0.019 |
| 43. LP ( 2) S 20         | /283. BD*( 2) C 12 - O 13 | 2.80 | 0.24 | 0.024 |
| 283. BD*( 2) C 12 - O 13 | /149. RY*( 3) C 12        | 1.85 | 1.60 | 0.137 |
| 283. BD*( 2) C 12 - O 13 | /165. RY*( 2) O 13        | 1.44 | 0.55 | 0.072 |
| 283. BD*( 2) C 12 - O 13 | /274. BD*( 1) C 2 - O 15  | 1.12 | 0.30 | 0.043 |
| 283. BD*( 2) C 12 - O 13 | /275. BD*( 1) C 2 - S 20  | 4.15 | 0.12 | 0.050 |
| 283. BD*( 2) C 12 - O 13 | /282. BD*( 1) C 12 - O 13 | 1.24 | 0.59 | 0.065 |

### 3-eq

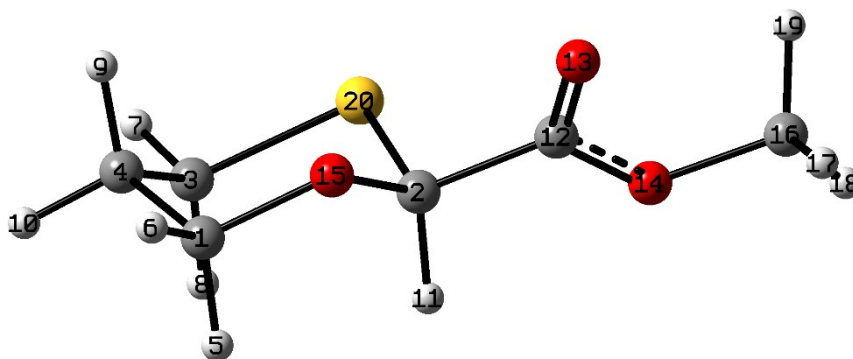

Second Order Perturbation Theory Analysis of Fock Matrix in NBO Basis

Threshold for printing: 0.50 kcal/mol

| Donor NBO (i)         | Acceptor NBO (j)          | E(2)<br>kcal/mol | E(j)-E(i)<br>a.u. | F(i,j)<br>a.u. |
|-----------------------|---------------------------|------------------|-------------------|----------------|
| =====                 |                           |                  |                   |                |
| within unit 1         |                           |                  |                   |                |
| 1. BD ( 1) C 1 - C 4  | / 78. RY*( 1) C 3         | 0.75             | 1.41              | 0.029          |
| 1. BD ( 1) C 1 - C 4  | /198. RY*( 1) O 15        | 0.84             | 1.33              | 0.030          |
| 1. BD ( 1) C 1 - C 4  | /276. BD*( 1) C 3 - C 4   | 0.66             | 1.00              | 0.023          |
| 1. BD ( 1) C 1 - C 4  | /277. BD*( 1) C 3 - H 7   | 1.72             | 1.02              | 0.037          |
| 2. BD ( 1) C 1 - H 5  | /271. BD*( 1) C 1 - O 15  | 0.64             | 0.79              | 0.020          |
| 2. BD ( 1) C 1 - H 5  | /280. BD*( 1) C 4 - H 9   | 2.62             | 0.92              | 0.044          |
| 3. BD ( 1) C 1 - H 6  | /199. RY*( 2) O 15        | 0.58             | 1.35              | 0.025          |
| 3. BD ( 1) C 1 - H 6  | /274. BD*( 1) C 2 - O 15  | 3.07             | 0.82              | 0.045          |
| 3. BD ( 1) C 1 - H 6  | /276. BD*( 1) C 3 - C 4   | 2.91             | 0.89              | 0.046          |
| 4. BD ( 1) C 1 - O 15 | / 61. RY*( 1) C 2         | 1.29             | 1.57              | 0.040          |
| 4. BD ( 1) C 1 - O 15 | /273. BD*( 1) C 2 - C 12  | 1.53             | 1.15              | 0.038          |
| 4. BD ( 1) C 1 - O 15 | /281. BD*( 1) C 4 - H 10  | 0.91             | 1.19              | 0.029          |
| 5. BD ( 1) C 2 - H 11 | /198. RY*( 1) O 15        | 0.55             | 1.24              | 0.023          |
| 5. BD ( 1) C 2 - H 11 | /282. BD*( 1) C 12 - O 13 | 3.59             | 1.14              | 0.057          |
| 5. BD ( 1) C 2 - H 11 | /283. BD*( 2) C 12 - O 13 | 1.93             | 0.54              | 0.030          |
| 6. BD ( 1) C 2 - C 12 | /164. RY*( 1) O 13        | 1.26             | 1.41              | 0.038          |
| 6. BD ( 1) C 2 - C 12 | /181. RY*( 1) O 14        | 0.76             | 1.29              | 0.028          |
| 6. BD ( 1) C 2 - C 12 | /185. RY*( 5) O 14        | 0.69             | 2.20              | 0.035          |
| 6. BD ( 1) C 2 - C 12 | /199. RY*( 2) O 15        | 0.78             | 1.51              | 0.031          |
| 6. BD ( 1) C 2 - C 12 | /271. BD*( 1) C 1 - O 15  | 2.75             | 0.95              | 0.046          |
| 6. BD ( 1) C 2 - C 12 | /282. BD*( 1) C 12 - O 13 | 1.50             | 1.28              | 0.039          |
| 6. BD ( 1) C 2 - C 12 | /285. BD*( 1) O 14 - C 16 | 4.14             | 0.92              | 0.055          |
| 7. BD ( 1) C 2 - O 15 | / 44. RY*( 1) C 1         | 1.11             | 1.80              | 0.040          |
| 7. BD ( 1) C 2 - O 15 | / 45. RY*( 2) C 1         | 0.78             | 1.83              | 0.034          |
| 7. BD ( 1) C 2 - O 15 | / 49. RY*( 6) C 1         | 0.51             | 2.39              | 0.031          |
| 7. BD ( 1) C 2 - O 15 | /147. RY*( 1) C 12        | 0.83             | 1.84              | 0.035          |
| 7. BD ( 1) C 2 - O 15 | /270. BD*( 1) C 1 - H 6   | 0.53             | 1.27              | 0.023          |
| 7. BD ( 1) C 2 - O 15 | /284. BD*( 1) C 12 - O 14 | 1.49             | 1.23              | 0.039          |
| 8. BD ( 1) C 2 - S 20 | / 78. RY*( 1) C 3         | 0.94             | 1.37              | 0.032          |
| 8. BD ( 1) C 2 - S 20 | /151. RY*( 5) C 12        | 0.95             | 1.45              | 0.033          |
| 8. BD ( 1) C 2 - S 20 | /198. RY*( 1) O 15        | 1.50             | 1.28              | 0.039          |
| 8. BD ( 1) C 2 - S 20 | /277. BD*( 1) C 3 - H 7   | 1.30             | 0.98              | 0.032          |
| 8. BD ( 1) C 2 - S 20 | /282. BD*( 1) C 12 - O 13 | 0.81             | 1.18              | 0.028          |

|                         |                           |       |       |       |
|-------------------------|---------------------------|-------|-------|-------|
| 8. BD ( 1) C 2 - S 20   | /283. BD*( 2) C 12 - 0 13 | 5.63  | 0.58  | 0.054 |
| 9. BD ( 1) C 3 - C 4    | / 44. RY*( 1) C 1         | 1.05  | 1.57  | 0.036 |
| 9. BD ( 1) C 3 - C 4    | /268. BD*( 1) C 1 - C 4   | 0.55  | 1.01  | 0.021 |
| 9. BD ( 1) C 3 - C 4    | /270. BD*( 1) C 1 - H 6   | 1.37  | 1.03  | 0.034 |
| 9. BD ( 1) C 3 - C 4    | /277. BD*( 1) C 3 - H 7   | 0.56  | 1.03  | 0.021 |
| 10. BD ( 1) C 3 - H 7   | / 96. RY*( 2) C 4         | 0.56  | 1.17  | 0.023 |
| 10. BD ( 1) C 3 - H 7   | /268. BD*( 1) C 1 - C 4   | 2.86  | 0.90  | 0.045 |
| 10. BD ( 1) C 3 - H 7   | /275. BD*( 1) C 2 - S 20  | 1.15  | 0.63  | 0.024 |
| 11. BD ( 1) C 3 - H 8   | / 95. RY*( 1) C 4         | 0.56  | 1.29  | 0.024 |
| 11. BD ( 1) C 3 - H 8   | /247. RY*( 1) S 20        | 0.58  | 1.16  | 0.023 |
| 11. BD ( 1) C 3 - H 8   | /280. BD*( 1) C 4 - H 9   | 2.61  | 0.92  | 0.044 |
| 12. BD ( 1) C 3 - S 20  | / 62. RY*( 2) C 2         | 0.62  | 1.88  | 0.031 |
| 12. BD ( 1) C 3 - S 20  | / 95. RY*( 1) C 4         | 0.96  | 1.36  | 0.032 |
| 12. BD ( 1) C 3 - S 20  | /273. BD*( 1) C 2 - C 12  | 1.13  | 0.93  | 0.029 |
| 12. BD ( 1) C 3 - S 20  | /281. BD*( 1) C 4 - H 10  | 2.22  | 0.97  | 0.042 |
| 13. BD ( 1) C 4 - H 9   | /269. BD*( 1) C 1 - H 5   | 2.65  | 0.87  | 0.043 |
| 13. BD ( 1) C 4 - H 9   | /278. BD*( 1) C 3 - H 8   | 2.84  | 0.88  | 0.045 |
| 14. BD ( 1) C 4 - H 10  | /271. BD*( 1) C 1 - 0 15  | 4.69  | 0.77  | 0.054 |
| 14. BD ( 1) C 4 - H 10  | /279. BD*( 1) C 3 - S 20  | 5.01  | 0.64  | 0.051 |
| 15. BD ( 1) C 12 - 0 13 | /147. RY*( 1) C 12        | 1.56  | 2.08  | 0.051 |
| 15. BD ( 1) C 12 - 0 13 | /273. BD*( 1) C 2 - C 12  | 1.57  | 1.45  | 0.043 |
| 16. BD ( 2) C 12 - 0 13 | /272. BD*( 1) C 2 - H 11  | 0.73  | 0.78  | 0.021 |
| 16. BD ( 2) C 12 - 0 13 | /275. BD*( 1) C 2 - S 20  | 1.79  | 0.52  | 0.028 |
| 16. BD ( 2) C 12 - 0 13 | /283. BD*( 2) C 12 - 0 13 | 0.74  | 0.41  | 0.016 |
| 17. BD ( 1) C 12 - 0 14 | /217. RY*( 3) C 16        | 1.01  | 1.93  | 0.040 |
| 17. BD ( 1) C 12 - 0 14 | /274. BD*( 1) C 2 - 0 15  | 0.92  | 1.25  | 0.031 |
| 17. BD ( 1) C 12 - 0 14 | /282. BD*( 1) C 12 - 0 13 | 0.58  | 1.55  | 0.027 |
| 18. BD ( 1) 0 14 - C 16 | /147. RY*( 1) C 12        | 1.59  | 1.80  | 0.048 |
| 18. BD ( 1) 0 14 - C 16 | /152. RY*( 6) C 12        | 0.56  | 2.42  | 0.033 |
| 18. BD ( 1) 0 14 - C 16 | /273. BD*( 1) C 2 - C 12  | 2.57  | 1.17  | 0.050 |
| 19. BD ( 1) C 16 - H 17 | /182. RY*( 2) 0 14        | 0.58  | 1.29  | 0.024 |
| 19. BD ( 1) C 16 - H 17 | /285. BD*( 1) 0 14 - C 16 | 0.72  | 0.78  | 0.021 |
| 20. BD ( 1) C 16 - H 18 | /184. RY*( 4) 0 14        | 0.61  | 1.91  | 0.030 |
| 20. BD ( 1) C 16 - H 18 | /284. BD*( 1) C 12 - 0 14 | 2.76  | 0.90  | 0.045 |
| 21. BD ( 1) C 16 - H 19 | /182. RY*( 2) 0 14        | 0.58  | 1.29  | 0.024 |
| 21. BD ( 1) C 16 - H 19 | /285. BD*( 1) 0 14 - C 16 | 0.72  | 0.78  | 0.021 |
| 22. CR ( 1) C 1         | / 96. RY*( 2) C 4         | 0.59  | 10.75 | 0.071 |
| 22. CR ( 1) C 1         | / 97. RY*( 3) C 4         | 0.60  | 11.22 | 0.073 |
| 22. CR ( 1) C 1         | /271. BD*( 1) C 1 - 0 15  | 1.34  | 10.37 | 0.106 |
| 22. CR ( 1) C 1         | /274. BD*( 1) C 2 - 0 15  | 0.95  | 10.41 | 0.089 |
| 23. CR ( 1) C 2         | /148. RY*( 2) C 12        | 0.57  | 11.92 | 0.073 |
| 23. CR ( 1) C 2         | /153. RY*( 7) C 12        | 0.73  | 11.28 | 0.081 |
| 23. CR ( 1) C 2         | /271. BD*( 1) C 1 - 0 15  | 1.09  | 10.44 | 0.096 |
| 23. CR ( 1) C 2         | /272. BD*( 1) C 2 - H 11  | 0.53  | 10.53 | 0.067 |
| 23. CR ( 1) C 2         | /275. BD*( 1) C 2 - S 20  | 0.59  | 10.28 | 0.071 |
| 23. CR ( 1) C 2         | /282. BD*( 1) C 12 - 0 13 | 0.65  | 10.76 | 0.075 |
| 24. CR ( 1) C 3         | / 97. RY*( 3) C 4         | 0.70  | 11.20 | 0.079 |
| 24. CR ( 1) C 3         | /279. BD*( 1) C 3 - S 20  | 1.23  | 10.22 | 0.100 |
| 25. CR ( 1) C 4         | / 79. RY*( 2) C 3         | 1.04  | 10.80 | 0.095 |
| 25. CR ( 1) C 4         | /132. RY*( 1) H 9         | 0.52  | 11.21 | 0.068 |
| 26. CR ( 1) C 12        | / 64. RY*( 4) C 2         | 1.43  | 11.12 | 0.113 |
| 26. CR ( 1) C 12        | /285. BD*( 1) 0 14 - C 16 | 1.21  | 10.44 | 0.101 |
| 27. CR ( 1) 0 13        | /147. RY*( 1) C 12        | 6.90  | 19.83 | 0.332 |
| 27. CR ( 1) 0 13        | /273. BD*( 1) C 2 - C 12  | 0.72  | 19.20 | 0.107 |
| 28. CR ( 1) 0 14        | /147. RY*( 1) C 12        | 1.58  | 19.96 | 0.159 |
| 28. CR ( 1) 0 14        | /148. RY*( 2) C 12        | 0.68  | 20.74 | 0.106 |
| 28. CR ( 1) 0 14        | /150. RY*( 4) C 12        | 0.96  | 20.73 | 0.126 |
| 28. CR ( 1) 0 14        | /215. RY*( 1) C 16        | 0.57  | 19.99 | 0.096 |
| 28. CR ( 1) 0 14        | /282. BD*( 1) C 12 - 0 13 | 0.56  | 19.59 | 0.094 |
| 29. CR ( 1) 0 15        | / 45. RY*( 2) C 1         | 1.19  | 19.90 | 0.138 |
| 29. CR ( 1) 0 15        | / 61. RY*( 1) C 2         | 2.41  | 19.71 | 0.195 |
| 30. CR ( 1) C 16        | /238. RY*( 2) H 18        | 0.51  | 12.11 | 0.070 |
| 30. CR ( 1) C 16        | /284. BD*( 1) C 12 - 0 14 | 0.79  | 10.47 | 0.083 |
| 30. CR ( 1) C 16        | /285. BD*( 1) 0 14 - C 16 | 1.86  | 10.35 | 0.124 |
| 32. CR ( 2) S 20        | / 65. RY*( 5) C 2         | 0.65  | 9.99  | 0.072 |
| 36. LP ( 1) 0 13        | /147. RY*( 1) C 12        | 16.43 | 1.69  | 0.149 |
| 36. LP ( 1) 0 13        | /150. RY*( 4) C 12        | 0.52  | 2.46  | 0.032 |
| 36. LP ( 1) 0 13        | /161. RY*( 15) C 12       | 0.64  | 2.91  | 0.039 |
| 36. LP ( 1) 0 13        | /273. BD*( 1) C 2 - C 12  | 2.07  | 1.06  | 0.042 |
| 36. LP ( 1) 0 13        | /284. BD*( 1) C 12 - 0 14 | 1.53  | 1.08  | 0.037 |
| 37. LP ( 2) 0 13        | /148. RY*( 2) C 12        | 3.07  | 2.04  | 0.073 |
| 37. LP ( 2) 0 13        | /150. RY*( 4) C 12        | 1.28  | 2.03  | 0.047 |
| 37. LP ( 2) 0 13        | /273. BD*( 1) C 2 - C 12  | 19.67 | 0.63  | 0.101 |
| 37. LP ( 2) 0 13        | /284. BD*( 1) C 12 - 0 14 | 31.33 | 0.65  | 0.129 |

|                          |                           |       |      |       |
|--------------------------|---------------------------|-------|------|-------|
| 37. LP ( 2) 0 13         | /287. BD*( 1) C 16 - H 18 | 0.67  | 0.67 | 0.020 |
| 38. LP ( 1) 0 14         | /147. RY*( 1) C 12        | 2.86  | 1.56 | 0.060 |
| 38. LP ( 1) 0 14         | /150. RY*( 4) C 12        | 2.12  | 2.33 | 0.063 |
| 38. LP ( 1) 0 14         | /215. RY*( 1) C 16        | 2.16  | 1.59 | 0.053 |
| 38. LP ( 1) 0 14         | /273. BD*( 1) C 2 - C 12  | 0.71  | 0.93 | 0.023 |
| 38. LP ( 1) 0 14         | /274. BD*( 1) C 2 - O 15  | 0.67  | 0.89 | 0.022 |
| 38. LP ( 1) 0 14         | /282. BD*( 1) C 12 - O 13 | 8.21  | 1.18 | 0.088 |
| 38. LP ( 1) 0 14         | /286. BD*( 1) C 16 - H 17 | 0.51  | 0.96 | 0.020 |
| 38. LP ( 1) 0 14         | /287. BD*( 1) C 16 - H 18 | 2.22  | 0.97 | 0.042 |
| 39. LP ( 2) 0 14         | /149. RY*( 3) C 12        | 2.81  | 1.91 | 0.069 |
| 39. LP ( 2) 0 14         | /216. RY*( 2) C 16        | 1.29  | 1.44 | 0.041 |
| 39. LP ( 2) 0 14         | /217. RY*( 3) C 16        | 0.71  | 1.32 | 0.029 |
| 39. LP ( 2) 0 14         | /283. BD*( 2) C 12 - O 13 | 48.65 | 0.34 | 0.115 |
| 39. LP ( 2) 0 14         | /286. BD*( 1) C 16 - H 17 | 4.32  | 0.72 | 0.053 |
| 39. LP ( 2) 0 14         | /288. BD*( 1) C 16 - H 19 | 4.30  | 0.72 | 0.053 |
| 40. LP ( 1) 0 15         | / 45. RY*( 2) C 1         | 1.96  | 1.52 | 0.049 |
| 40. LP ( 1) 0 15         | / 46. RY*( 3) C 1         | 0.75  | 2.08 | 0.036 |
| 40. LP ( 1) 0 15         | / 61. RY*( 1) C 2         | 2.50  | 1.33 | 0.052 |
| 40. LP ( 1) 0 15         | / 62. RY*( 2) C 2         | 1.14  | 1.86 | 0.041 |
| 40. LP ( 1) 0 15         | /269. BD*( 1) C 1 - H 5   | 1.51  | 0.94 | 0.034 |
| 40. LP ( 1) 0 15         | /270. BD*( 1) C 1 - H 6   | 2.37  | 0.96 | 0.043 |
| 40. LP ( 1) 0 15         | /272. BD*( 1) C 2 - H 11  | 2.14  | 0.94 | 0.040 |
| 40. LP ( 1) 0 15         | /273. BD*( 1) C 2 - C 12  | 1.97  | 0.91 | 0.038 |
| 40. LP ( 1) 0 15         | /275. BD*( 1) C 2 - S 20  | 0.86  | 0.68 | 0.022 |
| 41. LP ( 2) 0 15         | / 45. RY*( 2) C 1         | 0.72  | 1.28 | 0.028 |
| 41. LP ( 2) 0 15         | / 46. RY*( 3) C 1         | 0.87  | 1.84 | 0.037 |
| 41. LP ( 2) 0 15         | / 62. RY*( 2) C 2         | 0.52  | 1.62 | 0.027 |
| 41. LP ( 2) 0 15         | / 63. RY*( 3) C 2         | 1.81  | 1.89 | 0.053 |
| 41. LP ( 2) 0 15         | /268. BD*( 1) C 1 - C 4   | 5.69  | 0.70 | 0.058 |
| 41. LP ( 2) 0 15         | /269. BD*( 1) C 1 - H 5   | 4.01  | 0.70 | 0.048 |
| 41. LP ( 2) 0 15         | /272. BD*( 1) C 2 - H 11  | 4.73  | 0.69 | 0.052 |
| 41. LP ( 2) 0 15         | /275. BD*( 1) C 2 - S 20  | 14.09 | 0.44 | 0.071 |
| 41. LP ( 2) 0 15         | /281. BD*( 1) C 4 - H 10  | 0.60  | 0.71 | 0.019 |
| 42. LP ( 1) S 20         | / 65. RY*( 5) C 2         | 0.60  | 1.84 | 0.030 |
| 42. LP ( 1) S 20         | /276. BD*( 1) C 3 - C 4   | 0.58  | 1.03 | 0.022 |
| 43. LP ( 2) S 20         | / 61. RY*( 1) C 2         | 0.81  | 1.01 | 0.026 |
| 43. LP ( 2) S 20         | / 79. RY*( 2) C 3         | 0.55  | 1.01 | 0.021 |
| 43. LP ( 2) S 20         | /272. BD*( 1) C 2 - H 11  | 3.12  | 0.62 | 0.039 |
| 43. LP ( 2) S 20         | /274. BD*( 1) C 2 - O 15  | 6.48  | 0.55 | 0.054 |
| 43. LP ( 2) S 20         | /276. BD*( 1) C 3 - C 4   | 2.79  | 0.62 | 0.038 |
| 43. LP ( 2) S 20         | /278. BD*( 1) C 3 - H 8   | 4.11  | 0.63 | 0.046 |
| 43. LP ( 2) S 20         | /281. BD*( 1) C 4 - H 10  | 0.64  | 0.63 | 0.018 |
| 283. BD*( 2) C 12 - O 13 | /149. RY*( 3) C 12        | 1.65  | 1.56 | 0.133 |
| 283. BD*( 2) C 12 - O 13 | /165. RY*( 2) O 13        | 1.07  | 0.66 | 0.070 |
| 283. BD*( 2) C 12 - O 13 | /272. BD*( 1) C 2 - H 11  | 0.59  | 0.37 | 0.036 |
| 283. BD*( 2) C 12 - O 13 | /275. BD*( 1) C 2 - S 20  | 3.92  | 0.11 | 0.049 |
| 283. BD*( 2) C 12 - O 13 | /282. BD*( 1) C 12 - O 13 | 0.88  | 0.60 | 0.058 |

#### 4-ax

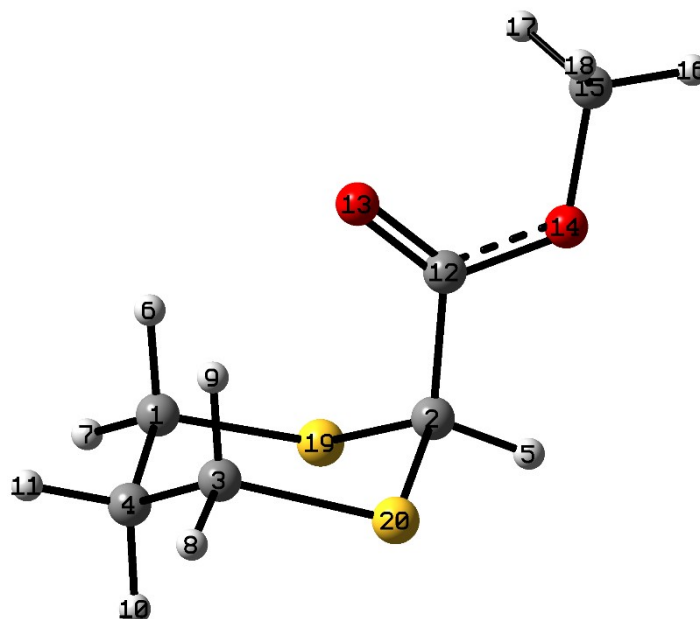

Second Order Perturbation Theory Analysis of Fock Matrix in NBO Basis

Threshold for printing: 0.50 kcal/mol

| Donor NBO (i)         | Acceptor NBO (j)          | E(2)<br>kcal/mol | E(j)-E(i)<br>a.u. | F(i,j)<br>a.u. |
|-----------------------|---------------------------|------------------|-------------------|----------------|
| within unit 1         |                           |                  |                   |                |
| 1. BD ( 1) C 1 - C 4  | / 82. RY*( 1) C 3         | 1.25             | 1.41              | 0.038          |
| 1. BD ( 1) C 1 - C 4  | /278. BD*( 1) C 1 - H 7   | 0.53             | 1.02              | 0.021          |
| 1. BD ( 1) C 1 - C 4  | /284. BD*( 1) C 3 - C 4   | 0.72             | 1.01              | 0.024          |
| 1. BD ( 1) C 1 - C 4  | /285. BD*( 1) C 3 - H 8   | 1.46             | 1.02              | 0.035          |
| 2. BD ( 1) C 1 - H 6  | /234. RY*( 1) S 19        | 0.61             | 1.02              | 0.022          |
| 2. BD ( 1) C 1 - H 6  | /288. BD*( 1) C 4 - H 10  | 2.70             | 0.91              | 0.044          |
| 3. BD ( 1) C 1 - H 7  | /100. RY*( 2) C 4         | 0.59             | 1.18              | 0.024          |
| 3. BD ( 1) C 1 - H 7  | /235. RY*( 2) S 19        | 0.79             | 1.35              | 0.029          |
| 3. BD ( 1) C 1 - H 7  | /282. BD*( 1) C 2 - S 19  | 1.69             | 0.65              | 0.030          |
| 3. BD ( 1) C 1 - H 7  | /284. BD*( 1) C 3 - C 4   | 3.13             | 0.89              | 0.047          |
| 4. BD ( 1) C 1 - S 19 | / 66. RY*( 2) C 2         | 0.64             | 1.45              | 0.027          |
| 4. BD ( 1) C 1 - S 19 | / 99. RY*( 1) C 4         | 1.02             | 1.29              | 0.033          |
| 4. BD ( 1) C 1 - S 19 | /280. BD*( 1) C 2 - H 5   | 1.31             | 0.98              | 0.032          |
| 4. BD ( 1) C 1 - S 19 | /289. BD*( 1) C 4 - H 11  | 1.96             | 0.98              | 0.039          |
| 5. BD ( 1) C 2 - H 5  | /154. RY*( 4) C 12        | 0.51             | 2.14              | 0.030          |
| 5. BD ( 1) C 2 - H 5  | /235. RY*( 2) S 19        | 0.54             | 1.38              | 0.025          |
| 5. BD ( 1) C 2 - H 5  | /256. RY*( 2) S 20        | 0.56             | 1.37              | 0.025          |
| 5. BD ( 1) C 2 - H 5  | /279. BD*( 1) C 1 - S 19  | 1.34             | 0.69              | 0.027          |
| 5. BD ( 1) C 2 - H 5  | /287. BD*( 1) C 3 - S 20  | 1.36             | 0.69              | 0.027          |
| 5. BD ( 1) C 2 - H 5  | /290. BD*( 1) C 12 - O 13 | 5.60             | 1.13              | 0.071          |
| 5. BD ( 1) C 2 - H 5  | /292. BD*( 1) C 12 - O 14 | 1.10             | 0.90              | 0.029          |
| 6. BD ( 1) C 2 - C 12 | /168. RY*( 1) O 13        | 1.24             | 1.44              | 0.038          |
| 6. BD ( 1) C 2 - C 12 | /185. RY*( 1) O 14        | 0.54             | 1.19              | 0.023          |
| 6. BD ( 1) C 2 - C 12 | /290. BD*( 1) C 12 - O 13 | 1.74             | 1.28              | 0.042          |
| 6. BD ( 1) C 2 - C 12 | /293. BD*( 1) O 14 - C 15 | 4.07             | 0.93              | 0.055          |
| 7. BD ( 1) C 2 - S 19 | / 48. RY*( 1) C 1         | 0.89             | 1.39              | 0.032          |
| 7. BD ( 1) C 2 - S 19 | /155. RY*( 5) C 12        | 0.83             | 1.28              | 0.029          |
| 7. BD ( 1) C 2 - S 19 | /278. BD*( 1) C 1 - H 7   | 0.96             | 1.00              | 0.028          |
| 7. BD ( 1) C 2 - S 19 | /291. BD*( 2) C 12 - O 13 | 3.72             | 0.60              | 0.045          |
| 7. BD ( 1) C 2 - S 19 | /292. BD*( 1) C 12 - O 14 | 1.06             | 0.97              | 0.029          |
| 8. BD ( 1) C 2 - S 20 | / 82. RY*( 1) C 3         | 0.89             | 1.40              | 0.032          |
| 8. BD ( 1) C 2 - S 20 | /155. RY*( 5) C 12        | 0.81             | 1.29              | 0.029          |
| 8. BD ( 1) C 2 - S 20 | /285. BD*( 1) C 3 - H 8   | 0.95             | 1.01              | 0.028          |
| 8. BD ( 1) C 2 - S 20 | /291. BD*( 2) C 12 - O 13 | 2.77             | 0.61              | 0.039          |
| 8. BD ( 1) C 2 - S 20 | /292. BD*( 1) C 12 - O 14 | 1.49             | 0.97              | 0.035          |
| 9. BD ( 1) C 3 - C 4  | / 48. RY*( 1) C 1         | 1.25             | 1.41              | 0.038          |
| 9. BD ( 1) C 3 - C 4  | /276. BD*( 1) C 1 - C 4   | 0.72             | 1.01              | 0.024          |
| 9. BD ( 1) C 3 - C 4  | /278. BD*( 1) C 1 - H 7   | 1.46             | 1.02              | 0.035          |
| 9. BD ( 1) C 3 - C 4  | /285. BD*( 1) C 3 - H 8   | 0.53             | 1.02              | 0.021          |
| 10. BD ( 1) C 3 - H 8 | /100. RY*( 2) C 4         | 0.59             | 1.18              | 0.024          |

|     |    |      |   |    |   |   |    |       |          |   |        |       |       |       |       |
|-----|----|------|---|----|---|---|----|-------|----------|---|--------|-------|-------|-------|-------|
| 10. | BD | ( 1) | C | 3  | - | H | 8  | /256. | RY*( 2)  | S | 20     | 0.79  | 1.35  | 0.029 |       |
| 10. | BD | ( 1) | C | 3  | - | H | 8  | /276. | BD*( 1)  | C | 1 - C  | 4     | 3.14  | 0.89  | 0.047 |
| 10. | BD | ( 1) | C | 3  | - | H | 8  | /283. | BD*( 1)  | C | 2 - S  | 20    | 1.70  | 0.65  | 0.030 |
| 11. | BD | ( 1) | C | 3  | - | H | 9  | / 99. | RY*( 1)  | C | 4      | 0.51  | 1.22  | 0.022 |       |
| 11. | BD | ( 1) | C | 3  | - | H | 9  | /255. | RY*( 1)  | S | 20     | 0.61  | 1.02  | 0.022 |       |
| 11. | BD | ( 1) | C | 3  | - | H | 9  | /288. | BD*( 1)  | C | 4 - H  | 10    | 2.70  | 0.91  | 0.044 |
| 12. | BD | ( 1) | C | 3  | - | S | 20 | / 66. | RY*( 2)  | C | 2      | 0.58  | 1.45  | 0.026 |       |
| 12. | BD | ( 1) | C | 3  | - | S | 20 | / 99. | RY*( 1)  | C | 4      | 1.01  | 1.29  | 0.032 |       |
| 12. | BD | ( 1) | C | 3  | - | S | 20 | /280. | BD*( 1)  | C | 2 - H  | 5     | 1.32  | 0.98  | 0.032 |
| 12. | BD | ( 1) | C | 3  | - | S | 20 | /283. | BD*( 1)  | C | 2 - S  | 20    | 0.50  | 0.72  | 0.017 |
| 12. | BD | ( 1) | C | 3  | - | S | 20 | /289. | BD*( 1)  | C | 4 - H  | 11    | 1.96  | 0.98  | 0.039 |
| 13. | BD | ( 1) | C | 4  | - | H | 10 | /277. | BD*( 1)  | C | 1 - H  | 6     | 2.76  | 0.89  | 0.044 |
| 13. | BD | ( 1) | C | 4  | - | H | 10 | /286. | BD*( 1)  | C | 3 - H  | 9     | 2.76  | 0.90  | 0.044 |
| 14. | BD | ( 1) | C | 4  | - | H | 11 | /279. | BD*( 1)  | C | 1 - S  | 19    | 5.50  | 0.64  | 0.053 |
| 14. | BD | ( 1) | C | 4  | - | H | 11 | /287. | BD*( 1)  | C | 3 - S  | 20    | 5.50  | 0.64  | 0.053 |
| 15. | BD | ( 1) | C | 12 | - | O | 13 | / 66. | RY*( 2)  | C | 2      | 0.50  | 1.97  | 0.028 |       |
| 15. | BD | ( 1) | C | 12 | - | O | 13 | /151. | RY*( 1)  | C | 12     | 1.71  | 1.96  | 0.052 |       |
| 15. | BD | ( 1) | C | 12 | - | O | 13 | /281. | BD*( 1)  | C | 2 - C  | 12    | 1.77  | 1.45  | 0.046 |
| 16. | BD | ( 2) | C | 12 | - | O | 13 | /186. | RY*( 2)  | O | 14     | 0.57  | 1.06  | 0.022 |       |
| 16. | BD | ( 2) | C | 12 | - | O | 13 | /282. | BD*( 1)  | C | 2 - S  | 19    | 1.28  | 0.53  | 0.024 |
| 16. | BD | ( 2) | C | 12 | - | O | 13 | /283. | BD*( 1)  | C | 2 - S  | 20    | 1.03  | 0.54  | 0.021 |
| 16. | BD | ( 2) | C | 12 | - | O | 13 | /291. | BD*( 2)  | C | 12 - O | 13    | 0.90  | 0.40  | 0.018 |
| 17. | BD | ( 1) | C | 12 | - | O | 14 | / 66. | RY*( 2)  | C | 2      | 0.61  | 1.81  | 0.030 |       |
| 17. | BD | ( 1) | C | 12 | - | O | 14 | /204. | RY*( 3)  | C | 15     | 1.61  | 1.73  | 0.047 |       |
| 17. | BD | ( 1) | C | 12 | - | O | 14 | /282. | BD*( 1)  | C | 2 - S  | 19    | 0.59  | 1.08  | 0.023 |
| 17. | BD | ( 1) | C | 12 | - | O | 14 | /283. | BD*( 1)  | C | 2 - S  | 20    | 0.82  | 1.08  | 0.027 |
| 18. | BD | ( 1) | O | 14 | - | C | 15 | /151. | RY*( 1)  | C | 12     | 1.66  | 1.68  | 0.047 |       |
| 18. | BD | ( 1) | O | 14 | - | C | 15 | /157. | RY*( 7)  | C | 12     | 0.53  | 1.75  | 0.027 |       |
| 18. | BD | ( 1) | O | 14 | - | C | 15 | /281. | BD*( 1)  | C | 2 - C  | 12    | 2.87  | 1.17  | 0.053 |
| 19. | BD | ( 1) | C | 15 | - | H | 16 | /292. | BD*( 1)  | C | 12 - O | 14    | 2.84  | 0.89  | 0.046 |
| 20. | BD | ( 1) | C | 15 | - | H | 17 | /186. | RY*( 2)  | O | 14     | 0.64  | 1.19  | 0.025 |       |
| 20. | BD | ( 1) | C | 15 | - | H | 17 | /293. | BD*( 1)  | O | 14 - C | 15    | 0.72  | 0.78  | 0.021 |
| 21. | BD | ( 1) | C | 15 | - | H | 18 | /186. | RY*( 2)  | O | 14     | 0.59  | 1.19  | 0.024 |       |
| 21. | BD | ( 1) | C | 15 | - | H | 18 | /293. | BD*( 1)  | O | 14 - C | 15    | 0.71  | 0.78  | 0.021 |
| 22. | CR | ( 1) | C | 1  |   |   |    | /101. | RY*( 3)  | C | 4      | 0.91  | 10.86 | 0.089 |       |
| 22. | CR | ( 1) | C | 1  |   |   |    | /279. | BD*( 1)  | C | 1 - S  | 19    | 1.28  | 10.22 | 0.103 |
| 23. | CR | ( 1) | C | 2  |   |   |    | /116. | RY*( 1)  | H | 5      | 0.60  | 11.39 | 0.074 |       |
| 23. | CR | ( 1) | C | 2  |   |   |    | /152. | RY*( 2)  | C | 12     | 0.77  | 11.91 | 0.086 |       |
| 23. | CR | ( 1) | C | 2  |   |   |    | /157. | RY*( 7)  | C | 12     | 0.72  | 11.07 | 0.079 |       |
| 23. | CR | ( 1) | C | 2  |   |   |    | /280. | BD*( 1)  | C | 2 - H  | 5     | 0.87  | 10.53 | 0.086 |
| 23. | CR | ( 1) | C | 2  |   |   |    | /282. | BD*( 1)  | C | 2 - S  | 19    | 0.50  | 10.27 | 0.065 |
| 23. | CR | ( 1) | C | 2  |   |   |    | /283. | BD*( 1)  | C | 2 - S  | 20    | 0.52  | 10.27 | 0.066 |
| 23. | CR | ( 1) | C | 2  |   |   |    | /290. | BD*( 1)  | C | 12 - O | 13    | 0.82  | 10.73 | 0.084 |
| 24. | CR | ( 1) | C | 3  |   |   |    | /101. | RY*( 3)  | C | 4      | 0.88  | 10.86 | 0.087 |       |
| 24. | CR | ( 1) | C | 3  |   |   |    | /287. | BD*( 1)  | C | 3 - S  | 20    | 1.28  | 10.22 | 0.103 |
| 25. | CR | ( 1) | C | 4  |   |   |    | / 49. | RY*( 2)  | C | 1      | 1.02  | 10.81 | 0.094 |       |
| 25. | CR | ( 1) | C | 4  |   |   |    | / 83. | RY*( 2)  | C | 3      | 1.01  | 10.82 | 0.093 |       |
| 26. | CR | ( 1) | C | 12 |   |   |    | / 65. | RY*( 1)  | C | 2      | 1.45  | 10.89 | 0.112 |       |
| 26. | CR | ( 1) | C | 12 |   |   |    | /293. | BD*( 1)  | O | 14 - C | 15    | 1.19  | 10.44 | 0.100 |
| 27. | CR | ( 1) | O | 13 |   |   |    | /151. | RY*( 1)  | C | 12     | 7.17  | 19.71 | 0.337 |       |
| 27. | CR | ( 1) | O | 13 |   |   |    | /281. | BD*( 1)  | C | 2 - C  | 12    | 0.71  | 19.20 | 0.106 |
| 28. | CR | ( 1) | O | 14 |   |   |    | /151. | RY*( 1)  | C | 12     | 1.58  | 19.84 | 0.159 |       |
| 28. | CR | ( 1) | O | 14 |   |   |    | /152. | RY*( 2)  | C | 12     | 0.66  | 20.76 | 0.105 |       |
| 28. | CR | ( 1) | O | 14 |   |   |    | /154. | RY*( 4)  | C | 12     | 1.04  | 20.58 | 0.131 |       |
| 28. | CR | ( 1) | O | 14 |   |   |    | /202. | RY*( 1)  | C | 15     | 0.55  | 19.99 | 0.094 |       |
| 28. | CR | ( 1) | O | 14 |   |   |    | /204. | RY*( 3)  | C | 15     | 0.64  | 19.76 | 0.100 |       |
| 28. | CR | ( 1) | O | 14 |   |   |    | /290. | BD*( 1)  | C | 12 - O | 13    | 0.54  | 19.57 | 0.092 |
| 29. | CR | ( 1) | C | 15 |   |   |    | /292. | BD*( 1)  | C | 12 - O | 14    | 0.84  | 10.46 | 0.086 |
| 29. | CR | ( 1) | C | 15 |   |   |    | /293. | BD*( 1)  | O | 14 - C | 15    | 1.85  | 10.35 | 0.124 |
| 31. | CR | ( 2) | S | 19 |   |   |    | / 67. | RY*( 3)  | C | 2      | 1.20  | 9.44  | 0.095 |       |
| 31. | CR | ( 2) | S | 19 |   |   |    | /283. | BD*( 1)  | C | 2 - S  | 20    | 0.52  | 8.93  | 0.062 |
| 36. | CR | ( 2) | S | 20 |   |   |    | / 67. | RY*( 3)  | C | 2      | 1.06  | 9.44  | 0.089 |       |
| 36. | CR | ( 2) | S | 20 |   |   |    | /282. | BD*( 1)  | C | 2 - S  | 19    | 0.53  | 8.93  | 0.062 |
| 40. | LP | ( 1) | O | 13 |   |   |    | /151. | RY*( 1)  | C | 12     | 17.27 | 1.57  | 0.147 |       |
| 40. | LP | ( 1) | O | 13 |   |   |    | /152. | RY*( 2)  | C | 12     | 0.54  | 2.49  | 0.033 |       |
| 40. | LP | ( 1) | O | 13 |   |   |    | /154. | RY*( 4)  | C | 12     | 0.61  | 2.31  | 0.034 |       |
| 40. | LP | ( 1) | O | 13 |   |   |    | /167. | RY*( 17) | C | 12     | 0.88  | 5.84  | 0.064 |       |
| 40. | LP | ( 1) | O | 13 |   |   |    | /281. | BD*( 1)  | C | 2 - C  | 12    | 2.33  | 1.06  | 0.045 |
| 40. | LP | ( 1) | O | 13 |   |   |    | /292. | BD*( 1)  | C | 12 - O | 14    | 1.31  | 1.07  | 0.034 |
| 41. | LP | ( 2) | O | 13 |   |   |    | /152. | RY*( 2)  | C | 12     | 2.85  | 2.06  | 0.071 |       |
| 41. | LP | ( 2) | O | 13 |   |   |    | /154. | RY*( 4)  | C | 12     | 1.23  | 1.88  | 0.045 |       |
| 41. | LP | ( 2) | O | 13 |   |   |    | /281. | BD*( 1)  | C | 2 - C  | 12    | 18.25 | 0.63  | 0.097 |
| 41. | LP | ( 2) | O | 13 |   |   |    | /292. | BD*( 1)  | C | 12 - O | 14    | 31.55 | 0.64  | 0.129 |
| 41. | LP | ( 2) | O | 13 |   |   |    | /294. | BD*( 1)  | C | 15 - H | 16    | 0.69  | 0.67  | 0.020 |

|                          |                           |       |      |       |
|--------------------------|---------------------------|-------|------|-------|
| 42. LP ( 1) O 14         | /151. RY*( 1) C 12        | 3.19  | 1.44 | 0.061 |
| 42. LP ( 1) O 14         | /154. RY*( 4) C 12        | 2.21  | 2.18 | 0.062 |
| 42. LP ( 1) O 14         | /202. RY*( 1) C 15        | 2.10  | 1.59 | 0.052 |
| 42. LP ( 1) O 14         | /290. BD*( 1) C 12 - O 13 | 8.23  | 1.17 | 0.088 |
| 42. LP ( 1) O 14         | /294. BD*( 1) C 15 - H 16 | 2.22  | 0.97 | 0.042 |
| 42. LP ( 1) O 14         | /295. BD*( 1) C 15 - H 17 | 0.52  | 0.96 | 0.020 |
| 43. LP ( 2) O 14         | /153. RY*( 3) C 12        | 2.82  | 1.94 | 0.070 |
| 43. LP ( 2) O 14         | /203. RY*( 2) C 15        | 1.80  | 1.54 | 0.050 |
| 43. LP ( 2) O 14         | /291. BD*( 2) C 12 - O 13 | 49.72 | 0.33 | 0.116 |
| 43. LP ( 2) O 14         | /295. BD*( 1) C 15 - H 17 | 4.26  | 0.72 | 0.052 |
| 43. LP ( 2) O 14         | /296. BD*( 1) C 15 - H 18 | 4.37  | 0.72 | 0.053 |
| 44. LP ( 1) S 19         | / 67. RY*( 3) C 2         | 0.78  | 1.29 | 0.029 |
| 44. LP ( 1) S 19         | /276. BD*( 1) C 1 - C 4   | 0.75  | 1.03 | 0.025 |
| 44. LP ( 1) S 19         | /283. BD*( 1) C 2 - S 20  | 2.13  | 0.78 | 0.037 |
| 45. LP ( 2) S 19         | / 65. RY*( 1) C 2         | 0.58  | 0.93 | 0.021 |
| 45. LP ( 2) S 19         | /276. BD*( 1) C 1 - C 4   | 3.16  | 0.63 | 0.040 |
| 45. LP ( 2) S 19         | /277. BD*( 1) C 1 - H 6   | 3.97  | 0.65 | 0.046 |
| 45. LP ( 2) S 19         | /281. BD*( 1) C 2 - C 12  | 4.54  | 0.59 | 0.046 |
| 45. LP ( 2) S 19         | /283. BD*( 1) C 2 - S 20  | 4.77  | 0.38 | 0.038 |
| 45. LP ( 2) S 19         | /289. BD*( 1) C 4 - H 11  | 0.62  | 0.64 | 0.018 |
| 45. LP ( 2) S 19         | /291. BD*( 2) C 12 - O 13 | 1.81  | 0.24 | 0.019 |
| 46. LP ( 1) S 20         | / 67. RY*( 3) C 2         | 0.64  | 1.29 | 0.026 |
| 46. LP ( 1) S 20         | /281. BD*( 1) C 2 - C 12  | 0.62  | 0.99 | 0.023 |
| 46. LP ( 1) S 20         | /282. BD*( 1) C 2 - S 19  | 2.10  | 0.78 | 0.036 |
| 46. LP ( 1) S 20         | /284. BD*( 1) C 3 - C 4   | 0.73  | 1.03 | 0.024 |
| 47. LP ( 2) S 20         | / 65. RY*( 1) C 2         | 0.58  | 0.93 | 0.021 |
| 47. LP ( 2) S 20         | /281. BD*( 1) C 2 - C 12  | 4.74  | 0.59 | 0.047 |
| 47. LP ( 2) S 20         | /282. BD*( 1) C 2 - S 19  | 5.07  | 0.38 | 0.039 |
| 47. LP ( 2) S 20         | /284. BD*( 1) C 3 - C 4   | 3.18  | 0.63 | 0.041 |
| 47. LP ( 2) S 20         | /286. BD*( 1) C 3 - H 9   | 3.96  | 0.65 | 0.046 |
| 47. LP ( 2) S 20         | /289. BD*( 1) C 4 - H 11  | 0.62  | 0.64 | 0.018 |
| 47. LP ( 2) S 20         | /291. BD*( 2) C 12 - O 13 | 1.19  | 0.24 | 0.016 |
| 291. BD*( 2) C 12 - O 13 | /153. RY*( 3) C 12        | 1.86  | 1.61 | 0.135 |
| 291. BD*( 2) C 12 - O 13 | /169. RY*( 2) O 13        | 1.98  | 0.52 | 0.080 |
| 291. BD*( 2) C 12 - O 13 | /282. BD*( 1) C 2 - S 19  | 3.42  | 0.14 | 0.050 |
| 291. BD*( 2) C 12 - O 13 | /283. BD*( 1) C 2 - S 20  | 2.99  | 0.14 | 0.047 |

#### 4-eq

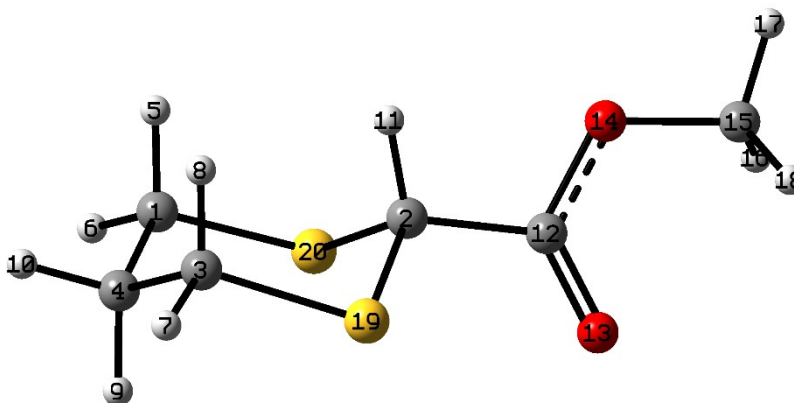

Second Order Perturbation Theory Analysis of Fock Matrix in NBO Basis

Threshold for printing: 0.50 kcal/mol

| Donor NBO (i)        | Acceptor NBO (j)        | E(2)<br>kcal/mol | E(j)-E(i)<br>a.u. | F(i,j)<br>a.u. |
|----------------------|-------------------------|------------------|-------------------|----------------|
| -----                |                         |                  |                   |                |
| within unit 1        |                         |                  |                   |                |
| 1. BD ( 1) C 1 - C 4 | / 82. RY*( 1) C 3       | 1.01             | 1.41              | 0.034          |
| 1. BD ( 1) C 1 - C 4 | /278. BD*( 1) C 1 - H 6 | 0.55             | 1.03              | 0.021          |
| 1. BD ( 1) C 1 - C 4 | /284. BD*( 1) C 3 - C 4 | 0.72             | 1.01              | 0.024          |
| 1. BD ( 1) C 1 - C 4 | /285. BD*( 1) C 3 - H 7 | 1.45             | 1.03              | 0.034          |
| 2. BD ( 1) C 1 - H 5 | / 99. RY*( 1) C 4       | 0.52             | 1.20              | 0.022          |
| 2. BD ( 1) C 1 - H 5 | /255. RY*( 1) S 20      | 0.57             | 1.03              | 0.022          |
| 2. BD ( 1) C 1 - H 5 | /288. BD*( 1) C 4 - H 9 | 2.66             | 0.92              | 0.044          |
| 3. BD ( 1) C 1 - H 6 | /100. RY*( 2) C 4       | 0.58             | 1.17              | 0.023          |

|     |    |      |   |        |    |       |         |   |        |      |       |       |       |
|-----|----|------|---|--------|----|-------|---------|---|--------|------|-------|-------|-------|
| 3.  | BD | ( 1) | C | 1 - H  | 6  | /256. | RY*( 2) | S | 20     | 0.76 | 1.33  | 0.028 |       |
| 3.  | BD | ( 1) | C | 1 - H  | 6  | /283. | BD*( 1) | C | 2 - S  | 20   | 1.34  | 0.64  | 0.026 |
| 3.  | BD | ( 1) | C | 1 - H  | 6  | /284. | BD*( 1) | C | 3 - C  | 4    | 3.17  | 0.89  | 0.048 |
| 4.  | BD | ( 1) | C | 1 - S  | 20 | / 67. | RY*( 3) | C | 2      | 0.99 | 1.68  | 0.037 |       |
| 4.  | BD | ( 1) | C | 1 - S  | 20 | / 99. | RY*( 1) | C | 4      | 1.06 | 1.27  | 0.033 |       |
| 4.  | BD | ( 1) | C | 1 - S  | 20 | /281. | BD*( 1) | C | 2 - C  | 12   | 1.46  | 0.93  | 0.033 |
| 4.  | BD | ( 1) | C | 1 - S  | 20 | /289. | BD*( 1) | C | 4 - H  | 10   | 1.93  | 0.98  | 0.039 |
| 5.  | BD | ( 1) | C | 2 - H  | 11 | /154. | RY*( 4) | C | 12     | 0.57 | 2.15  | 0.031 |       |
| 5.  | BD | ( 1) | C | 2 - H  | 11 | /290. | BD*( 1) | C | 12 - 0 | 13   | 5.23  | 1.14  | 0.069 |
| 5.  | BD | ( 1) | C | 2 - H  | 11 | /292. | BD*( 1) | C | 12 - 0 | 14   | 1.05  | 0.91  | 0.028 |
| 6.  | BD | ( 1) | C | 2 - C  | 12 | /168. | RY*( 1) | O | 13     | 1.17 | 1.40  | 0.036 |       |
| 6.  | BD | ( 1) | C | 2 - C  | 12 | /186. | RY*( 2) | O | 14     | 0.81 | 1.33  | 0.030 |       |
| 6.  | BD | ( 1) | C | 2 - C  | 12 | /290. | BD*( 1) | C | 12 - 0 | 13   | 1.86  | 1.29  | 0.044 |
| 6.  | BD | ( 1) | C | 2 - C  | 12 | /293. | BD*( 1) | O | 14 - C | 15   | 4.08  | 0.93  | 0.055 |
| 7.  | BD | ( 1) | C | 2 - S  | 19 | / 82. | RY*( 1) | C | 3      | 1.33 | 1.38  | 0.038 |       |
| 7.  | BD | ( 1) | C | 2 - S  | 19 | /155. | RY*( 5) | C | 12     | 0.82 | 1.40  | 0.030 |       |
| 7.  | BD | ( 1) | C | 2 - S  | 19 | /285. | BD*( 1) | C | 3 - H  | 7    | 1.10  | 1.00  | 0.030 |
| 7.  | BD | ( 1) | C | 2 - S  | 19 | /291. | BD*( 2) | C | 12 - 0 | 13   | 3.05  | 0.60  | 0.040 |
| 7.  | BD | ( 1) | C | 2 - S  | 19 | /292. | BD*( 1) | C | 12 - 0 | 14   | 1.73  | 0.97  | 0.037 |
| 8.  | BD | ( 1) | C | 2 - S  | 20 | / 48. | RY*( 1) | C | 1      | 1.32 | 1.38  | 0.038 |       |
| 8.  | BD | ( 1) | C | 2 - S  | 20 | /155. | RY*( 5) | C | 12     | 1.06 | 1.39  | 0.034 |       |
| 8.  | BD | ( 1) | C | 2 - S  | 20 | /278. | BD*( 1) | C | 1 - H  | 6    | 1.10  | 1.00  | 0.030 |
| 8.  | BD | ( 1) | C | 2 - S  | 20 | /291. | BD*( 2) | C | 12 - 0 | 13   | 4.08  | 0.59  | 0.046 |
| 8.  | BD | ( 1) | C | 2 - S  | 20 | /292. | BD*( 1) | C | 12 - 0 | 14   | 1.05  | 0.96  | 0.029 |
| 9.  | BD | ( 1) | C | 3 - C  | 4  | / 48. | RY*( 1) | C | 1      | 1.00 | 1.41  | 0.034 |       |
| 9.  | BD | ( 1) | C | 3 - C  | 4  | /276. | BD*( 1) | C | 1 - C  | 4    | 0.72  | 1.01  | 0.024 |
| 9.  | BD | ( 1) | C | 3 - C  | 4  | /278. | BD*( 1) | C | 1 - H  | 6    | 1.45  | 1.03  | 0.034 |
| 9.  | BD | ( 1) | C | 3 - C  | 4  | /285. | BD*( 1) | C | 3 - H  | 7    | 0.56  | 1.03  | 0.021 |
| 10. | BD | ( 1) | C | 3 - H  | 7  | /100. | RY*( 2) | C | 4      | 0.58 | 1.17  | 0.023 |       |
| 10. | BD | ( 1) | C | 3 - H  | 7  | /235. | RY*( 2) | S | 19     | 0.75 | 1.32  | 0.028 |       |
| 10. | BD | ( 1) | C | 3 - H  | 7  | /276. | BD*( 1) | C | 1 - C  | 4    | 3.18  | 0.89  | 0.048 |
| 10. | BD | ( 1) | C | 3 - H  | 7  | /282. | BD*( 1) | C | 2 - S  | 19   | 1.34  | 0.65  | 0.026 |
| 11. | BD | ( 1) | C | 3 - H  | 8  | / 99. | RY*( 1) | C | 4      | 0.52 | 1.20  | 0.022 |       |
| 11. | BD | ( 1) | C | 3 - H  | 8  | /234. | RY*( 1) | S | 19     | 0.58 | 1.03  | 0.022 |       |
| 11. | BD | ( 1) | C | 3 - H  | 8  | /288. | BD*( 1) | C | 4 - H  | 9    | 2.67  | 0.92  | 0.044 |
| 12. | BD | ( 1) | C | 3 - S  | 19 | / 67. | RY*( 3) | C | 2      | 0.96 | 1.68  | 0.036 |       |
| 12. | BD | ( 1) | C | 3 - S  | 19 | / 99. | RY*( 1) | C | 4      | 1.06 | 1.27  | 0.033 |       |
| 12. | BD | ( 1) | C | 3 - S  | 19 | /281. | BD*( 1) | C | 2 - C  | 12   | 1.51  | 0.93  | 0.034 |
| 12. | BD | ( 1) | C | 3 - S  | 19 | /289. | BD*( 1) | C | 4 - H  | 10   | 1.94  | 0.98  | 0.039 |
| 13. | BD | ( 1) | C | 4 - H  | 9  | /277. | BD*( 1) | C | 1 - H  | 5    | 2.84  | 0.88  | 0.045 |
| 13. | BD | ( 1) | C | 4 - H  | 9  | /286. | BD*( 1) | C | 3 - H  | 8    | 2.85  | 0.88  | 0.045 |
| 14. | BD | ( 1) | C | 4 - H  | 10 | /279. | BD*( 1) | C | 1 - S  | 20   | 5.48  | 0.64  | 0.053 |
| 14. | BD | ( 1) | C | 4 - H  | 10 | /287. | BD*( 1) | C | 3 - S  | 19   | 5.46  | 0.64  | 0.053 |
| 15. | BD | ( 1) | C | 12 - 0 | 13 | /151. | RY*( 1) | C | 12     | 1.64 | 2.00  | 0.051 |       |
| 15. | BD | ( 1) | C | 12 - 0 | 13 | /281. | BD*( 1) | C | 2 - C  | 12   | 1.81  | 1.46  | 0.047 |
| 16. | BD | ( 2) | C | 12 - 0 | 13 | /282. | BD*( 1) | C | 2 - S  | 19   | 0.83  | 0.54  | 0.019 |
| 16. | BD | ( 2) | C | 12 - 0 | 13 | /283. | BD*( 1) | C | 2 - S  | 20   | 1.20  | 0.53  | 0.023 |
| 16. | BD | ( 2) | C | 12 - 0 | 13 | /291. | BD*( 2) | C | 12 - 0 | 13   | 0.79  | 0.40  | 0.017 |
| 17. | BD | ( 1) | C | 12 - 0 | 14 | /204. | RY*( 3) | C | 15     | 1.68 | 1.72  | 0.048 |       |
| 17. | BD | ( 1) | C | 12 - 0 | 14 | /282. | BD*( 1) | C | 2 - S  | 19   | 0.81  | 1.08  | 0.027 |
| 17. | BD | ( 1) | C | 12 - 0 | 14 | /283. | BD*( 1) | C | 2 - S  | 20   | 0.56  | 1.08  | 0.022 |
| 18. | BD | ( 1) | O | 14 - C | 15 | /151. | RY*( 1) | C | 12     | 1.63 | 1.71  | 0.047 |       |
| 18. | BD | ( 1) | O | 14 - C | 15 | /281. | BD*( 1) | C | 2 - C  | 12   | 2.87  | 1.17  | 0.052 |
| 19. | BD | ( 1) | C | 15 - H | 16 | /293. | BD*( 1) | O | 14 - C | 15   | 0.73  | 0.77  | 0.021 |
| 20. | BD | ( 1) | C | 15 - H | 17 | /188. | RY*( 4) | O | 14     | 0.60 | 1.82  | 0.030 |       |
| 20. | BD | ( 1) | C | 15 - H | 17 | /292. | BD*( 1) | C | 12 - 0 | 14   | 2.80  | 0.89  | 0.046 |
| 21. | BD | ( 1) | C | 15 - H | 18 | /185. | RY*( 1) | O | 14     | 0.60 | 1.03  | 0.022 |       |
| 21. | BD | ( 1) | C | 15 - H | 18 | /293. | BD*( 1) | O | 14 - C | 15   | 0.73  | 0.77  | 0.021 |
| 22. | CR | ( 1) | C | 1      |    | /101. | RY*( 3) | C | 4      | 0.89 | 10.84 | 0.088 |       |
| 22. | CR | ( 1) | C | 1      |    | /279. | BD*( 1) | C | 1 - S  | 20   | 1.27  | 10.23 | 0.102 |
| 23. | CR | ( 1) | C | 2      |    | /146. | RY*( 1) | H | 11     | 0.53 | 11.17 | 0.068 |       |
| 23. | CR | ( 1) | C | 2      |    | /152. | RY*( 2) | C | 12     | 0.63 | 11.88 | 0.077 |       |
| 23. | CR | ( 1) | C | 2      |    | /157. | RY*( 7) | C | 12     | 0.81 | 10.93 | 0.084 |       |
| 23. | CR | ( 1) | C | 2      |    | /280. | BD*( 1) | C | 2 - H  | 11   | 0.63  | 10.53 | 0.073 |
| 23. | CR | ( 1) | C | 2      |    | /282. | BD*( 1) | C | 2 - S  | 19   | 0.55  | 10.27 | 0.068 |
| 23. | CR | ( 1) | C | 2      |    | /283. | BD*( 1) | C | 2 - S  | 20   | 0.55  | 10.26 | 0.068 |
| 23. | CR | ( 1) | C | 2      |    | /290. | BD*( 1) | C | 12 - 0 | 13   | 0.78  | 10.73 | 0.082 |
| 24. | CR | ( 1) | C | 3      |    | /101. | RY*( 3) | C | 4      | 0.90 | 10.84 | 0.088 |       |
| 24. | CR | ( 1) | C | 3      |    | /287. | BD*( 1) | C | 3 - S  | 19   | 1.26  | 10.23 | 0.102 |
| 25. | CR | ( 1) | C | 4      |    | / 49. | RY*( 2) | C | 1      | 1.00 | 10.77 | 0.093 |       |
| 25. | CR | ( 1) | C | 4      |    | / 83. | RY*( 2) | C | 3      | 1.00 | 10.77 | 0.092 |       |
| 26. | CR | ( 1) | C | 12     |    | / 68. | RY*( 4) | C | 2      | 1.47 | 10.99 | 0.114 |       |
| 26. | CR | ( 1) | C | 12     |    | /293. | BD*( 1) | O | 14 - C | 15   | 1.20  | 10.44 | 0.100 |
| 27. | CR | ( 1) | O | 13     |    | /151. | RY*( 1) | C | 12     | 7.07 | 19.74 | 0.335 |       |



|                          |                           |       |       |       |
|--------------------------|---------------------------|-------|-------|-------|
| 27. CR ( 1) O 13         | /281. BD*( 1) C 2 - C 12  | 0.70  | 19.21 | 0.105 |
| 28. CR ( 1) O 14         | /151. RY*( 1) C 12        | 1.55  | 19.87 | 0.157 |
| 28. CR ( 1) O 14         | /152. RY*( 2) C 12        | 0.68  | 20.73 | 0.106 |
| 28. CR ( 1) O 14         | /154. RY*( 4) C 12        | 1.11  | 20.59 | 0.135 |
| 28. CR ( 1) O 14         | /202. RY*( 1) C 15        | 0.56  | 20.00 | 0.095 |
| 28. CR ( 1) O 14         | /204. RY*( 3) C 15        | 0.60  | 19.75 | 0.097 |
| 28. CR ( 1) O 14         | /290. BD*( 1) C 12 - O 13 | 0.55  | 19.58 | 0.093 |
| 29. CR ( 1) C 15         | /292. BD*( 1) C 12 - O 14 | 0.81  | 10.47 | 0.084 |
| 29. CR ( 1) C 15         | /293. BD*( 1) O 14 - C 15 | 1.87  | 10.35 | 0.125 |
| 31. CR ( 2) S 19         | / 65. RY*( 1) C 2         | 0.81  | 9.55  | 0.079 |
| 31. CR ( 2) S 19         | / 66. RY*( 2) C 2         | 0.64  | 9.41  | 0.069 |
| 36. CR ( 2) S 20         | / 66. RY*( 2) C 2         | 1.38  | 9.41  | 0.102 |
| 40. LP ( 1) O 13         | /151. RY*( 1) C 12        | 17.14 | 1.60  | 0.148 |
| 40. LP ( 1) O 13         | /154. RY*( 4) C 12        | 0.62  | 2.32  | 0.034 |
| 40. LP ( 1) O 13         | /167. RY*( 17) C 12       | 1.31  | 3.32  | 0.059 |
| 40. LP ( 1) O 13         | /281. BD*( 1) C 2 - C 12  | 2.14  | 1.06  | 0.043 |
| 40. LP ( 1) O 13         | /292. BD*( 1) C 12 - O 14 | 1.39  | 1.08  | 0.035 |
| 41. LP ( 2) O 13         | /152. RY*( 2) C 12        | 3.06  | 2.03  | 0.073 |
| 41. LP ( 2) O 13         | /154. RY*( 4) C 12        | 1.20  | 1.89  | 0.044 |
| 41. LP ( 2) O 13         | /281. BD*( 1) C 2 - C 12  | 18.38 | 0.63  | 0.098 |
| 41. LP ( 2) O 13         | /292. BD*( 1) C 12 - O 14 | 31.59 | 0.65  | 0.129 |
| 41. LP ( 2) O 13         | /295. BD*( 1) C 15 - H 17 | 0.70  | 0.68  | 0.020 |
| 42. LP ( 1) O 14         | /151. RY*( 1) C 12        | 3.15  | 1.47  | 0.061 |
| 42. LP ( 1) O 14         | /154. RY*( 4) C 12        | 2.32  | 2.19  | 0.064 |
| 42. LP ( 1) O 14         | /202. RY*( 1) C 15        | 2.09  | 1.60  | 0.052 |
| 42. LP ( 1) O 14         | /281. BD*( 1) C 2 - C 12  | 0.51  | 0.93  | 0.020 |
| 42. LP ( 1) O 14         | /290. BD*( 1) C 12 - O 13 | 8.27  | 1.18  | 0.088 |
| 42. LP ( 1) O 14         | /295. BD*( 1) C 15 - H 17 | 2.20  | 0.97  | 0.042 |
| 43. LP ( 2) O 14         | /153. RY*( 3) C 12        | 3.01  | 1.93  | 0.072 |
| 43. LP ( 2) O 14         | /160. RY*( 10) C 12       | 0.51  | 1.84  | 0.029 |
| 43. LP ( 2) O 14         | /203. RY*( 2) C 15        | 1.77  | 1.54  | 0.049 |
| 43. LP ( 2) O 14         | /291. BD*( 2) C 12 - O 13 | 50.44 | 0.33  | 0.116 |
| 43. LP ( 2) O 14         | /294. BD*( 1) C 15 - H 16 | 4.24  | 0.72  | 0.052 |
| 43. LP ( 2) O 14         | /296. BD*( 1) C 15 - H 18 | 4.28  | 0.72  | 0.053 |
| 44. LP ( 1) S 19         | /280. BD*( 1) C 2 - H 11  | 0.76  | 1.03  | 0.025 |
| 44. LP ( 1) S 19         | /283. BD*( 1) C 2 - S 20  | 1.13  | 0.77  | 0.027 |
| 44. LP ( 1) S 19         | /286. BD*( 1) C 3 - H 8   | 0.67  | 1.03  | 0.024 |
| 45. LP ( 2) S 19         | / 66. RY*( 2) C 2         | 0.52  | 0.85  | 0.019 |
| 45. LP ( 2) S 19         | / 83. RY*( 2) C 3         | 0.59  | 0.98  | 0.022 |
| 45. LP ( 2) S 19         | /280. BD*( 1) C 2 - H 11  | 3.24  | 0.64  | 0.041 |
| 45. LP ( 2) S 19         | /283. BD*( 1) C 2 - S 20  | 7.09  | 0.38  | 0.046 |
| 45. LP ( 2) S 19         | /284. BD*( 1) C 3 - C 4   | 3.70  | 0.63  | 0.044 |
| 45. LP ( 2) S 19         | /286. BD*( 1) C 3 - H 8   | 3.53  | 0.64  | 0.043 |
| 45. LP ( 2) S 19         | /289. BD*( 1) C 4 - H 10  | 0.65  | 0.64  | 0.018 |
| 46. LP ( 1) S 20         | / 66. RY*( 2) C 2         | 0.52  | 1.25  | 0.023 |
| 46. LP ( 1) S 20         | /277. BD*( 1) C 1 - H 5   | 0.67  | 1.03  | 0.024 |
| 46. LP ( 1) S 20         | /280. BD*( 1) C 2 - H 11  | 0.72  | 1.04  | 0.025 |
| 46. LP ( 1) S 20         | /282. BD*( 1) C 2 - S 19  | 1.10  | 0.78  | 0.026 |
| 47. LP ( 2) S 20         | / 49. RY*( 2) C 1         | 0.58  | 0.98  | 0.022 |
| 47. LP ( 2) S 20         | /276. BD*( 1) C 1 - C 4   | 3.70  | 0.63  | 0.044 |
| 47. LP ( 2) S 20         | /277. BD*( 1) C 1 - H 5   | 3.50  | 0.64  | 0.043 |
| 47. LP ( 2) S 20         | /280. BD*( 1) C 2 - H 11  | 3.16  | 0.64  | 0.041 |
| 47. LP ( 2) S 20         | /282. BD*( 1) C 2 - S 19  | 6.90  | 0.38  | 0.046 |
| 47. LP ( 2) S 20         | /289. BD*( 1) C 4 - H 10  | 0.65  | 0.64  | 0.018 |
| 291. BD*( 2) C 12 - O 13 | /153. RY*( 3) C 12        | 1.63  | 1.59  | 0.131 |
| 291. BD*( 2) C 12 - O 13 | /160. RY*( 10) C 12       | 0.68  | 1.51  | 0.083 |
| 291. BD*( 2) C 12 - O 13 | /169. RY*( 2) O 13        | 0.74  | 0.89  | 0.066 |
| 291. BD*( 2) C 12 - O 13 | /282. BD*( 1) C 2 - S 19  | 2.46  | 0.14  | 0.044 |
| 291. BD*( 2) C 12 - O 13 | /283. BD*( 1) C 2 - S 20  | 3.13  | 0.14  | 0.048 |

Table S4: Dipole moment of the compounds 1-4 optimized at CBS-QB3 level.

|             | Dipole Moment<br>(debye) |             | Dipole Moment<br>(debye) |
|-------------|--------------------------|-------------|--------------------------|
| <b>1-ax</b> | 2.4                      | <b>1-eq</b> | 2.4                      |
| <b>2-ax</b> | 3.4                      | <b>2-eq</b> | 4.7                      |
| <b>3-ax</b> | 1.4                      | <b>3-eq</b> | 4.5                      |
| <b>4-ax</b> | 1.4                      | <b>4-eq</b> | 3.7                      |

**Table S5: Cartesian Co-ordinates of optimization at CBS-QB3 method with SMD(chloroform) solvation model:**

| <u>1-ax</u>   |                         |           |           | <u>1-eq</u>   |                         |           |           |
|---------------|-------------------------|-----------|-----------|---------------|-------------------------|-----------|-----------|
| Atomic Number | Coordinates (Angstroms) |           |           | Atomic Number | Coordinates (Angstroms) |           |           |
|               | X                       | Y         | Z         |               | X                       | Y         | Z         |
| 6             | 1.398203                | 1.431121  | -0.562750 | 6             | -2.381455               | -1.045966 | -0.524781 |
| 6             | 0.107024                | -0.126004 | 1.003598  | 6             | -0.055191               | -0.049176 | -0.332624 |
| 6             | 1.960059                | -1.041985 | -0.509026 | 6             | -2.107042               | 1.411822  | 0.035832  |
| 6             | 2.506942                | 0.379185  | -0.704260 | 6             | -2.969280               | 0.156668  | 0.225794  |
| 1             | -0.272418               | -0.177379 | 2.031815  | 1             | -2.439884               | -0.861990 | -1.605378 |
| 1             | 0.679568                | 1.316825  | -1.384990 | 1             | -2.978094               | -1.942714 | -0.328815 |
| 1             | 1.815674                | 2.439146  | -0.654737 | 1             | -2.509145               | 2.242144  | 0.625478  |
| 1             | 2.777598                | -1.769565 | -0.547088 | 1             | -2.146667               | 1.724962  | -1.015347 |
| 1             | 1.283231                | -1.287665 | -1.334020 | 1             | -3.029794               | -0.080188 | 1.295773  |
| 1             | 3.285351                | 0.576226  | 0.044973  | 1             | -3.993225               | 0.348563  | -0.111176 |
| 1             | 2.987888                | 0.465855  | -1.684285 | 1             | -0.023021               | 0.207427  | -1.396580 |
| 6             | -1.111188               | -0.419164 | 0.135763  | 6             | 1.371572                | -0.276381 | 0.122383  |
| 8             | -1.275525               | -1.402847 | -0.549894 | 8             | 1.711218                | -0.972423 | 1.052764  |
| 8             | -2.044626               | 0.546555  | 0.253745  | 8             | 2.245358                | 0.432571  | -0.620638 |
| 6             | -3.266337               | 0.347241  | -0.485477 | 6             | 3.631982                | 0.345339  | -0.231936 |
| 1             | -3.887818               | 1.211838  | -0.260235 | 1             | 3.982488                | -0.686574 | -0.286354 |
| 1             | -3.064019               | 0.296792  | -1.556700 | 1             | 4.173320                | 0.965713  | -0.943624 |
| 1             | -3.763763               | -0.570005 | -0.165542 | 1             | 3.771654                | 0.724147  | 0.782129  |
| 6             | 0.667808                | 1.298486  | 0.780639  | 6             | -0.920757               | -1.303730 | -0.130868 |
| 1             | 1.372722                | 1.509378  | 1.593244  | 1             | -0.866580               | -1.603228 | 0.921036  |
| 1             | -0.136875               | 2.031968  | 0.859465  | 1             | -0.511329               | -2.134109 | -0.715249 |
| 6             | 1.204578                | -1.189058 | 0.821131  | 6             | -0.645869               | 1.161750  | 0.432205  |
| 1             | 0.769145                | -2.188288 | 0.897974  | 1             | -0.040426               | 2.051914  | 0.236481  |
| 1             | 1.912393                | -1.083733 | 1.651611  | 1             | -0.585667               | 0.960793  | 1.508583  |

| <u>2-ax</u>   |                         |           |           | <u>2-eq</u>   |                         |           |           |
|---------------|-------------------------|-----------|-----------|---------------|-------------------------|-----------|-----------|
| Atomic Number | Coordinates (Angstroms) |           |           | Atomic Number | Coordinates (Angstroms) |           |           |
|               | X                       | Y         | Z         |               | X                       | Y         | Z         |
| 6             | 1.262442                | 1.424046  | -0.411442 | 6             | 1.916412                | 1.399809  | 0.110017  |
| 6             | 0.224482                | -0.179691 | 0.987941  | 6             | 0.135237                | -0.060134 | -0.348894 |
| 6             | 1.839421                | -0.985594 | -0.553974 | 6             | 2.276842                | -0.988403 | -0.476569 |
| 6             | 2.380929                | 0.431764  | -0.711578 | 6             | 2.837326                | 0.198198  | 0.302756  |
| 1             | -0.064046               | -0.308718 | 2.034221  | 1             | 1.958475                | 1.761466  | -0.927552 |
| 1             | 0.483533                | 1.382062  | -1.185917 | 1             | 2.171456                | 2.225607  | 0.774444  |
| 1             | 1.626455                | 2.449975  | -0.353829 | 1             | 2.797272                | -1.916978 | -0.242167 |
| 1             | 2.632814                | -1.732740 | -0.580422 | 1             | 2.350819                | -0.812504 | -1.559588 |
| 1             | 1.118205                | -1.220801 | -1.345200 | 1             | 2.884803                | -0.055783 | 1.365657  |
| 1             | 3.204248                | 0.591045  | -0.008819 | 1             | 3.849351                | 0.434841  | -0.040093 |
| 1             | 2.760864                | 0.581420  | -1.726912 | 1             | 0.164563                | 0.213461  | -1.416953 |
| 6             | -1.054859               | -0.446192 | 0.145834  | 6             | -1.308403               | -0.354784 | 0.069007  |
| 8             | -1.303719               | -1.489367 | -0.406166 | 8             | -1.656492               | -1.262450 | 0.777707  |
| 8             | -1.880056               | 0.605537  | 0.185447  | 8             | -2.126333               | 0.559238  | -0.465340 |
| 8             | 0.684169                | 1.143344  | 0.875419  | 8             | 0.560267                | 1.039309  | 0.428152  |
| 8             | 1.210118                | -1.138918 | 0.733970  | 8             | 0.899466                | -1.208260 | -0.125769 |
| 6             | -3.157637               | 0.434213  | -0.468899 | 6             | -3.523413               | 0.444819  | -0.115275 |
| 1             | -3.679557               | 1.379645  | -0.338648 | 1             | -3.655208               | 0.551131  | 0.962410  |

|   |           |           |           |   |           |           |           |
|---|-----------|-----------|-----------|---|-----------|-----------|-----------|
| 1 | -3.017818 | 0.219576  | -1.529248 | 1 | -4.021286 | 1.257269  | -0.639921 |
| 1 | -3.717459 | -0.377516 | -0.001877 | 1 | -3.919516 | -0.518240 | -0.440492 |

**3-ax**

| Atomic<br>Number | Coordinates (Angstroms) |           |           |
|------------------|-------------------------|-----------|-----------|
|                  | X                       | Y         | Z         |
| 6                | -1.752959               | 0.799084  | 1.045295  |
| 6                | 0.043320                | 0.023075  | -0.934919 |
| 6                | -1.695592               | -1.465180 | -0.090122 |
| 6                | -2.572832               | -0.361817 | 0.487060  |
| 1                | 0.449711                | 0.314854  | -1.902596 |
| 1                | -1.104726               | 0.477081  | 1.863780  |
| 1                | -2.394118               | 1.599805  | 1.418225  |
| 1                | -2.309137               | -2.247818 | -0.537505 |
| 1                | -1.071136               | -1.911416 | 0.686675  |
| 1                | -3.259225               | 0.007321  | -0.280980 |
| 1                | -3.175012               | -0.797316 | 1.292555  |
| 6                | 1.208994                | -0.366935 | -0.025459 |
| 8                | 1.151582                | -1.130168 | 0.910659  |
| 8                | 2.322484                | 0.272497  | -0.407041 |
| 8                | -0.861024               | -1.011519 | -1.180083 |
| 6                | 3.492843                | 0.068999  | 0.416260  |
| 1                | 4.280895                | 0.653939  | -0.052620 |
| 1                | 3.308145                | 0.423834  | 1.431384  |
| 1                | 3.763518                | -0.987366 | 0.437967  |
| 16               | -0.733494               | 1.577328  | -0.270866 |

**3-eq**

| Atomic<br>Number | Coordinates (Angstroms) |           |           |
|------------------|-------------------------|-----------|-----------|
|                  | X                       | Y         | Z         |
| 6                | -2.070477               | 1.353013  | 0.420001  |
| 6                | 0.017930                | 0.244585  | 0.361780  |
| 6                | -2.336626               | -1.155502 | 0.170638  |
| 6                | -2.898747               | 0.221115  | -0.178935 |
| 1                | -2.067330               | 1.292770  | 1.518110  |
| 1                | -2.472516               | 2.324562  | 0.131839  |
| 1                | -2.890314               | -1.952420 | -0.328827 |
| 1                | -2.382368               | -1.338167 | 1.247947  |
| 1                | -2.942271               | 0.341352  | -1.265087 |
| 1                | -3.921609               | 0.299371  | 0.207019  |
| 1                | -0.026518               | 0.125395  | 1.451547  |
| 6                | 1.469349                | 0.447031  | -0.059882 |
| 8                | 1.855033                | 1.307027  | -0.807121 |
| 8                | 2.253334                | -0.467390 | 0.526588  |
| 8                | -0.716826               | 1.350216  | -0.056881 |
| 6                | 3.659219                | -0.406532 | 0.196692  |
| 1                | 4.077771                | 0.555803  | 0.494529  |
| 1                | 4.122915                | -1.213098 | 0.760046  |
| 1                | 3.805858                | -0.556923 | -0.873716 |
| 16               | -0.592489               | -1.351233 | -0.381616 |

**4-ax**

| Atomic<br>Number | Coordinates (Angstroms) |           |           |
|------------------|-------------------------|-----------|-----------|
|                  | X                       | Y         | Z         |
| 6                | -1.638527               | 1.334427  | 0.751996  |
| 6                | 0.219148                | -0.047302 | -0.878068 |
| 6                | -1.791216               | -1.227015 | 0.740146  |
| 6                | -2.543208               | 0.102789  | 0.768802  |
| 1                | 0.664260                | -0.067828 | -1.871883 |
| 1                | -0.940816               | 1.325965  | 1.590730  |
| 1                | -2.234208               | 2.247722  | 0.816948  |
| 1                | -2.492604               | -2.063077 | 0.784513  |
| 1                | -1.105313               | -1.312991 | 1.583487  |
| 1                | -3.254612               | 0.149691  | -0.060984 |
| 1                | -3.124191               | 0.132636  | 1.698805  |
| 6                | 1.329795                | -0.083182 | 0.159377  |
| 8                | 1.172445                | -0.165052 | 1.356300  |
| 8                | 2.527905                | 0.003844  | -0.434402 |
| 6                | 3.677725                | 0.010915  | 0.442499  |
| 1                | 4.538670                | 0.130188  | -0.211298 |
| 1                | 3.614245                | 0.841854  | 1.146221  |
| 1                | 3.742064                | -0.930459 | 0.990229  |
| 16               | -0.682451               | 1.549615  | -0.800898 |
| 16               | -0.850836               | -1.531355 | -0.808506 |

**4-eq**

| Atomic<br>Number | Coordinates (Angstroms) |           |           |
|------------------|-------------------------|-----------|-----------|
|                  | X                       | Y         | Z         |
| 6                | -2.298249               | 1.285744  | 0.180029  |
| 6                | 0.118795                | -0.000103 | 0.542759  |
| 6                | -2.298343               | -1.285631 | 0.180027  |
| 6                | -2.903909               | 0.000080  | -0.384350 |
| 1                | -2.407934               | 1.329600  | 1.267402  |
| 1                | -2.801547               | 2.160355  | -0.237140 |
| 1                | -2.801730               | -2.160204 | -0.237111 |
| 1                | -2.408004               | -1.329455 | 1.267404  |
| 1                | -2.826839               | 0.000081  | -1.475162 |
| 1                | -3.971907               | 0.000115  | -0.132559 |
| 1                | -0.183362               | -0.000033 | 1.589269  |
| 6                | 1.637989                | -0.000080 | 0.537236  |
| 8                | 2.305554                | 0.000030  | 1.542612  |
| 8                | 2.133837                | -0.000154 | -0.703429 |
| 6                | 3.575562                | 0.000086  | -0.818107 |
| 1                | 3.992324                | -0.892991 | -0.350889 |
| 1                | 3.778094                | 0.000701  | -1.886525 |
| 1                | 3.992114                | 0.892670  | -0.349789 |
| 16               | -0.527165               | -1.535481 | -0.237311 |
| 16               | -0.527047               | 1.535454  | -0.237309 |

**Table S6: Cartesian Co-ordinates of optimization at B3LYP/6-311+G(d,p)/SMD(chloroform):**

| <u>1-ax</u>   |                         |           |           | <u>1-eq</u>   |                         |           |           |
|---------------|-------------------------|-----------|-----------|---------------|-------------------------|-----------|-----------|
| Atomic Number | Coordinates (Angstroms) |           |           | Atomic Number | Coordinates (Angstroms) |           |           |
|               | X                       | Y         | Z         |               | X                       | Y         | Z         |
| 6             | -1.026984               | -1.726036 | 0.027972  | 6             | -2.069589               | -1.709369 | 0.616602  |
| 6             | -0.722543               | 0.800855  | 0.281205  | 6             | -0.250682               | -0.247275 | -0.373329 |
| 6             | -2.986096               | -0.300057 | 0.777024  | 6             | -2.390336               | 0.803659  | 0.514014  |
| 6             | -2.299308               | -1.668712 | 0.885017  | 6             | -2.707441               | -0.484251 | 1.285578  |
| 1             | -0.018164               | 1.539450  | 0.684238  | 1             | -2.545137               | -1.879126 | -0.358191 |
| 1             | -1.298938               | -1.654507 | -1.033651 | 1             | -2.256740               | -2.607332 | 1.214411  |
| 1             | -0.525369               | -2.691148 | 0.155306  | 1             | -2.798929               | 1.672526  | 1.040629  |
| 1             | -3.847323               | -0.255878 | 1.452046  | 1             | -2.882658               | 0.771643  | -0.466567 |
| 1             | -3.377651               | -0.169072 | -0.237395 | 1             | -2.326351               | -0.393620 | 2.311032  |
| 1             | -2.034129               | -1.862727 | 1.932961  | 1             | -3.791407               | -0.618254 | 1.364545  |
| 1             | -2.992605               | -2.461988 | 0.586000  | 1             | -0.683215               | -0.329291 | -1.376314 |
| 6             | -0.939292               | 1.237780  | -1.162222 | 6             | 1.238031                | -0.027383 | -0.542635 |
| 8             | -1.973192               | 1.663370  | -1.630090 | 8             | 2.098749                | -0.368785 | 0.240249  |
| 8             | 0.196312                | 1.143935  | -1.882875 | 8             | 1.511703                | 0.640378  | -1.681819 |
| 6             | 0.128744                | 1.567368  | -3.260389 | 6             | 2.895854                | 0.969438  | -1.925727 |
| 1             | 1.132686                | 1.425868  | -3.656464 | 1             | 3.494516                | 0.061783  | -2.017211 |
| 1             | -0.585405               | 0.956600  | -3.814976 | 1             | 2.902338                | 1.520466  | -2.864250 |
| 1             | -0.158594               | 2.617902  | -3.326069 | 1             | 3.290952                | 1.590237  | -1.120216 |
| 6             | -2.023353               | 0.852884  | 1.103107  | 6             | -0.557905               | -1.527632 | 0.420346  |
| 1             | -2.521618               | 1.814436  | 0.955990  | 1             | -0.062646               | -1.469809 | 1.395518  |
| 1             | -1.744777               | 0.798156  | 2.162166  | 1             | -0.135598               | -2.395806 | -0.095955 |
| 6             | -0.057214               | -0.592077 | 0.388103  | 6             | -0.880335               | 0.991532  | 0.313113  |
| 1             | 0.275469                | -0.720296 | 1.424769  | 1             | -0.686450               | 1.886549  | -0.285317 |
| 1             | 0.836545                | -0.630867 | -0.237900 | 1             | -0.395660               | 1.141060  | 1.285518  |

  

| <u>2-ax</u>   |                         |           |           | <u>2-eq</u>   |                         |           |           |
|---------------|-------------------------|-----------|-----------|---------------|-------------------------|-----------|-----------|
| Atomic Number | Coordinates (Angstroms) |           |           | Atomic Number | Coordinates (Angstroms) |           |           |
|               | X                       | Y         | Z         |               | X                       | Y         | Z         |
| 6             | -1.946109               | -1.480990 | -0.156235 | 6             | -1.942415               | -1.650765 | 0.815799  |
| 6             | -0.350962               | 0.234300  | 0.218029  | 6             | -0.409479               | -0.409036 | -0.455440 |
| 6             | -2.503134               | 0.523006  | 1.198453  | 6             | -2.287261               | 0.765700  | 0.318945  |
| 6             | -2.773527               | -0.966132 | 1.015660  | 6             | -2.565467               | -0.351996 | 1.319470  |
| 1             | 0.703240                | 0.347855  | 0.483512  | 1             | -2.467945               | -2.018218 | -0.076406 |
| 1             | -2.300971               | -1.056674 | -1.105927 | 1             | -1.955898               | -2.434410 | 1.573326  |
| 1             | -1.975645               | -2.567533 | -0.237953 | 1             | -2.553900               | 1.746413  | 0.712644  |
| 1             | -2.918205               | 0.903666  | 2.131690  | 1             | -2.840081               | 0.603528  | -0.616697 |
| 1             | -2.924233               | 1.105299  | 0.371456  | 1             | -2.134879               | -0.090672 | 2.290421  |
| 1             | -2.497757               | -1.509157 | 1.924735  | 1             | -3.644894               | -0.479649 | 1.448289  |
| 1             | -3.838681               | -1.132594 | 0.827662  | 1             | -0.942064               | -0.674418 | -1.381125 |
| 6             | -0.560021               | 1.053131  | -1.089962 | 6             | 1.077008                | -0.264568 | -0.794953 |
| 8             | -1.077561               | 2.143109  | -1.141766 | 8             | 1.510530                | -0.423911 | -1.913363 |
| 8             | -0.010174               | 0.427589  | -2.134259 | 8             | 1.807556                | 0.049923  | 0.269211  |
| 8             | -0.558367               | -1.143813 | 0.033070  | 8             | -0.553612               | -1.442279 | 0.488163  |
| 8             | -1.082842               | 0.768922  | 1.283095  | 8             | -0.877364               | 0.827880  | 0.024225  |
| 6             | -0.034838               | 1.132468  | -3.397597 | 6             | 3.229966                | 0.208036  | 0.056717  |
| 1             | 0.458165                | 0.470577  | -4.106197 | 1             | 3.418421                | 1.010204  | -0.657836 |

|   |           |          |           |   |          |           |           |
|---|-----------|----------|-----------|---|----------|-----------|-----------|
| 1 | -1.063377 | 1.322081 | -3.707128 | 1 | 3.638671 | 0.464125  | 1.031585  |
| 1 | 0.506969  | 2.075554 | -3.314727 | 1 | 3.664228 | -0.724495 | -0.305873 |

**3-ax**

**3-eq**

| Atomic<br>Number | Coordinates (Angstroms) |           |           |
|------------------|-------------------------|-----------|-----------|
|                  | X                       | Y         | Z         |
| 6                | -2.404509               | -1.657629 | -0.012590 |
| 6                | -0.303087               | 0.174896  | 0.005229  |
| 6                | -2.383767               | 0.548994  | 1.234729  |
| 6                | -2.811788               | -0.912607 | 1.256053  |
| 1                | 0.765611                | 0.268679  | 0.194367  |
| 1                | -2.871012               | -1.224985 | -0.900852 |
| 1                | -2.682277               | -2.711864 | 0.035602  |
| 1                | -2.627973               | 1.034792  | 2.179842  |
| 1                | -2.880381               | 1.088502  | 0.425673  |
| 1                | -2.390238               | -1.413762 | 2.132791  |
| 1                | -3.903418               | -0.938160 | 1.351682  |
| 6                | -0.619917               | 0.881647  | -1.313263 |
| 8                | -1.689291               | 1.357199  | -1.622199 |
| 8                | 0.463249                | 0.893362  | -2.101132 |
| 8                | -0.950447               | 0.720303  | 1.116213  |
| 6                | 0.296703                | 1.450750  | -3.424995 |
| 1                | 1.263413                | 1.336121  | -3.910446 |
| 1                | -0.471253               | 0.902773  | -3.972595 |
| 1                | 0.026466                | 2.505462  | -3.360684 |
| 16               | -0.574115               | -1.653808 | -0.217813 |

| Atomic<br>Number | Coordinates (Angstroms) |           |           |
|------------------|-------------------------|-----------|-----------|
|                  | X                       | Y         | Z         |
| 6                | -2.200808               | -1.581085 | 0.169896  |
| 6                | -0.170218               | -0.379513 | -0.039436 |
| 6                | -2.407594               | 0.790799  | 1.044026  |
| 6                | -2.852987               | -0.661608 | 1.196432  |
| 1                | -2.478776               | -1.283920 | -0.851257 |
| 1                | -2.508366               | -2.616050 | 0.321572  |
| 1                | -2.823131               | 1.420862  | 1.832156  |
| 1                | -2.722734               | 1.203297  | 0.081418  |
| 1                | -2.623980               | -1.019490 | 2.204270  |
| 1                | -3.939485               | -0.717308 | 1.062557  |
| 1                | -0.498436               | -0.023884 | -1.023231 |
| 6                | 1.343146                | -0.564242 | -0.049864 |
| 8                | 1.930015                | -1.485953 | 0.458226  |
| 8                | 1.928290                | 0.448667  | -0.700389 |
| 8                | -0.766731               | -1.597007 | 0.278841  |
| 6                | 3.374552                | 0.442235  | -0.742690 |
| 1                | 3.734990                | -0.453328 | -1.249949 |
| 1                | 3.649573                | 1.333296  | -1.302694 |
| 1                | 3.781738                | 0.487818  | 0.268168  |
| 16               | -0.577937               | 0.967810  | 1.189049  |

**4-ax**

**4-eq**

| Atomic<br>Number | Coordinates (Angstroms) |           |           |
|------------------|-------------------------|-----------|-----------|
|                  | X                       | Y         | Z         |
| 6                | -2.472774               | -1.634881 | 0.067975  |
| 6                | -0.145867               | -0.016251 | -0.150298 |
| 6                | -2.504561               | 0.605313  | 1.317925  |
| 6                | -2.880000               | -0.875312 | 1.329354  |
| 1                | 0.940391                | -0.043255 | -0.077518 |
| 1                | -2.908711               | -1.183466 | -0.824843 |
| 1                | -2.809903               | -2.672220 | 0.121054  |
| 1                | -2.855008               | 1.095417  | 2.228724  |
| 1                | -2.947011               | 1.120736  | 0.464356  |
| 1                | -2.459721               | -1.362995 | 2.214025  |
| 1                | -3.972126               | -0.937120 | 1.412086  |
| 6                | -0.532292               | 0.671494  | -1.448374 |
| 8                | -1.663659               | 0.915967  | -1.804298 |
| 8                | 0.559612                | 0.967340  | -2.168585 |
| 6                | 0.339151                | 1.599791  | -3.451173 |
| 1                | 1.330544                | 1.737607  | -3.877427 |
| 1                | -0.264771               | 0.956102  | -4.091951 |
| 1                | -0.156379               | 2.562265  | -3.318299 |
| 16               | -0.653188               | -1.782819 | -0.172850 |
| 16               | -0.691757               | 0.926953  | 1.325726  |

| Atomic<br>Number | Coordinates (Angstroms) |           |           |
|------------------|-------------------------|-----------|-----------|
|                  | X                       | Y         | Z         |
| 6                | -2.408099               | -1.582935 | -0.038504 |
| 6                | -0.012060               | -0.216262 | 0.203925  |
| 6                | -2.433342               | 0.663614  | 1.210251  |
| 6                | -2.996559               | -0.752947 | 1.102242  |
| 1                | -2.563516               | -1.093792 | -1.004404 |
| 1                | -2.886432               | -2.563400 | -0.084317 |
| 1                | -2.929645               | 1.211697  | 2.013552  |
| 1                | -2.589346               | 1.223053  | 0.283210  |
| 1                | -2.867359               | -1.279319 | 2.052128  |
| 1                | -4.075609               | -0.665346 | 0.922767  |
| 1                | -0.340962               | 0.281787  | -0.707468 |
| 6                | 1.505806                | -0.222937 | 0.243035  |
| 8                | 2.172544                | -0.613774 | 1.171583  |
| 8                | 2.009493                | 0.262895  | -0.897830 |
| 6                | 3.453322                | 0.307155  | -0.998513 |
| 1                | 3.869396                | -0.697284 | -0.912526 |
| 1                | 3.658923                | 0.721470  | -1.982930 |
| 1                | 3.865492                | 0.950052  | -0.219995 |
| 16               | -0.646117               | 0.736358  | 1.645510  |
| 16               | -0.614809               | -1.958693 | 0.145384  |

## References :

1. P. Politzer and D. G. Truhlar, *Chemical Applications of Atomic and Molecular Electrostatic Potentials: Reactivity, Structure, Scattering, and Energetics of Organic, Inorganic, and Biological Systems*, Springer US, 1981.
2. P. Politzer and J. S. Murray, *Reviews in computational chemistry*, 1991, 273-312.
3. S. R. Gadre and R. N. Shirsat, *Electrostatics of atoms and molecules*, Universities Press, 2000.
